1 Title (117 characters): **Transmission of West Nile and other temperate mosquito-borne**  
2 **viruses peaks at intermediate environmental temperatures**

3 Marta S. Shocket<sup>1,2\*</sup> (mshocket@stanford.edu), Anna B. Verwillow<sup>1</sup> (anna19@stanford.edu),  
4 Mailo G. Numazu<sup>1</sup> (mnumazu@stanford.edu), Hani Slamani<sup>3</sup> (hanisl@vt.edu), Jeremy M.  
5 Cohen<sup>4,5</sup> (jcohen39@wisc.edu), Fadoua El Moustaid<sup>6</sup> (fadoua@vt.edu), Jason Rohr<sup>4,7</sup>  
6 (jasonrohr@gmail.com), Leah R. Johnson<sup>3,6</sup> (lrjohn@vt.edu), and Erin A. Mordecai<sup>1</sup>  
7 (emordeca@stanford.edu)

8  
9 <sup>1</sup>Department of Biology, Stanford University, Stanford, CA, USA

10 <sup>2</sup>Department of Ecology and Evolutionary Biology, University of California Los Angeles, Los  
11 Angeles, CA, USA

12 <sup>3</sup>Department of Statistics, Virginia Polytechnic Institute and State University (Virginia Tech),  
13 Blacksburg, Virginia, USA

14 <sup>4</sup>Department of Integrative Biology, University of South Florida, Tampa, FL, USA

15 <sup>5</sup>Department of Forest and Wildlife Ecology, University of Wisconsin, Madison, WI, USA

16 <sup>6</sup>Department of Biological Sciences, Virginia Polytechnic Institute and State University (Virginia  
17 Tech), Blacksburg, Virginia, USA

18 <sup>7</sup>Department of Biological Sciences, Eck Institute of Global Health, Environmental Change  
19 Initiative, University of Notre Dame, South Bend, IN, USA

20  
21 **Keywords:** *Culex pipiens*, *Culex tarsalis*, *Culex quinquefasciatus*, West Nile virus, Western  
22 Equine Encephalitis virus, Eastern Equine encephalitis virus, St. Louis Encephalitis virus, Rift  
23 Valley Fever virus, Sindbis virus, Ockelbo disease, mosquito-borne disease, infectious disease,

24 temperature

25 \* Corresponding Author: Marta S. Shocket, [mshocket@stanford.edu](mailto:mshocket@stanford.edu), phone: 650-723-5923

26

27 *Availability of data and material*: Upon acceptance, all data and code will be submitted to Dryad  
28 repository and the appropriate web link will be listed here for publication.

29 *Authors' contributions*: EAM, LRJ, and MSS conceived of and designed the study. MN, AV, HS,  
30 FEM, and MSS collected trait data. MN and MSS fit models. JC compiled West Nile virus case  
31 data and climate data. JC and MSS analyzed West Nile virus case data. MSS wrote the first draft  
32 of the manuscript. All authors revised and approved the manuscript.

33 **ABSTRACT (150 WORDS = LIMIT)**

34 The temperature-dependence of many important mosquito-borne diseases has never been  
35 quantified. These relationships are critical for understanding current distributions and predicting  
36 future shifts from climate change. We used trait-based models to characterize temperature-  
37 dependent transmission of 10 vector–pathogen pairs of mosquitoes (*Culex pipiens*, *Cx.*  
38 *quinquefasciatus*, *Cx. tarsalis*, and others) and viruses (West Nile, Eastern and Western Equine  
39 Encephalitis, St. Louis Encephalitis, Sindbis, and Rift Valley Fever viruses), most with  
40 substantial transmission in temperate regions. Transmission is optimized at intermediate  
41 temperatures (23–26°C) and often has wider thermal breadths (due to cooler lower thermal  
42 limits) compared to pathogens with predominately tropical distributions (in previous studies).  
43 The incidence of human West Nile virus cases across US counties responded unimodally to  
44 average summer temperature and peaked at 24°C, matching model-predicted optima (24–25°C).  
45 Climate warming will likely shift transmission of these diseases, increasing it in cooler locations  
46 while decreasing it in warmer locations.

## 47 **INTRODUCTION**

48           Temperature is a key driver of transmission of mosquito-borne diseases because the  
49 mosquitoes and pathogens are ectotherms whose physiology and life histories depend strongly on  
50 environmental temperature [1–8]. These temperature-dependent traits drive the biological  
51 processes required for transmission. For example, temperature-dependent fecundity,  
52 development, and mortality of mosquitoes determine whether vectors are present in sufficient  
53 numbers for transmission. Temperature also affects the mosquito biting rate on hosts and  
54 probability of becoming infectious.

55           Mechanistic models based on these traits and guided by principles of thermal biology  
56 predict that the thermal response of transmission is unimodal: transmission peaks at intermediate  
57 temperatures and declines at extreme cold and hot temperatures [2–12]. This unimodal response  
58 is predicted consistently across mosquito-borne diseases [2–8] and supported by independent  
59 empirical evidence for positive relationships between temperature and human cases in many  
60 settings [5,13–16], but negative relationships at extremely high temperatures in other studies  
61 [2,16–19]. Accordingly, we expect increasing temperatures due to climate change to shift disease  
62 distributions geographically and seasonally, as warming increases transmission in cooler settings  
63 but decreases it in settings near or above the optimal temperature for transmission [20–23]. Thus,  
64 mechanistic models have provided a powerful and general rule describing how temperature  
65 affects the transmission of mosquito-borne disease. However, thermal responses vary among  
66 mosquito and pathogen species and drive important differences in how predicted transmission  
67 responds to temperature, including the specific temperatures of the optimum and thermal limits  
68 for each vector–pathogen pair [2–7]. We currently lack a framework to describe or predict this  
69 variation among vectors and pathogens.

70 Filling this gap requires comparing mechanistic, temperature-dependent transmission  
71 models for many vector–pathogen pairs. However, models that incorporate all relevant traits are  
72 not yet available for many important pairs for several reasons. First, the number of relevant  
73 vector–pathogen pairs is large because many mosquitoes transmit multiple pathogens and many  
74 pathogens are transmitted by multiple vectors. Second, empirical data are costly to produce, and  
75 existing data are often insufficient because experiments or data reporting were not designed for  
76 this purpose. Here, we address these challenges by systematically compiling data and building  
77 models for understudied mosquito-borne disease systems, including important pathogens with  
78 substantial transmission in temperate areas like West Nile virus (WNV) and Eastern Equine  
79 Encephalitis virus (EEEV). Accurately characterizing the thermal limits and optima for these  
80 systems is critical for understanding where and when temperature currently promotes or  
81 suppresses transmission and where and when climate change will increase, decrease, or have  
82 minimal effects on transmission.

83 In this study, we model the effects of temperature on an overlapping suite of widespread,  
84 important mosquito vectors and viruses that currently lack complete temperature-dependent  
85 models. These viruses include: West Nile virus (WNV), St. Louis Encephalitis virus (SLEV),  
86 Eastern and Western Equine Encephalitis viruses (EEEV and WEEV), Sindbis virus (SINV), and  
87 Rift Valley fever virus (RVFV) [24–28] (summarized in Table 1). All but RVFV sustain  
88 substantial transmission in temperate regions [24–28]. We selected this group because many of  
89 the viruses share common vector species and several vector species transmit multiple viruses  
90 (Table 1, Fig 1). All the viruses cause febrile illness and severe disease symptoms, including  
91 long-term arthralgia and neuroinvasive syndromes with a substantial risk of mortality in severe  
92 cases [24–28]. Since invading North America in 1999, WNV is now distributed worldwide

93 [21,24] and is the most common mosquito-borne disease in the US, Canada, and Europe. SLEV,  
94 EEEV, and WEEV occur in the Western hemisphere (Table 1), with cases in North, Central, and  
95 South America [28–30]. For EEEV, the North American strains are genetically distinct and more  
96 virulent than the Central and South American strains [28]. An unusually large outbreak of EEEV  
97 in the United States last year (2019) has yielded incidence four times higher than average (31  
98 cases, resulting in 9 fatalities) and brought renewed attention to this disease [31]. SINV occurs  
99 across Europe, Africa, Asia, and Australia, with substantial transmission in northern Europe and  
100 southern Africa [26,28]. RVFV originated in eastern Africa and now also occurs across Africa  
101 and the Middle East [27]. These pathogens primarily circulate and amplify in wild bird reservoir  
102 hosts (except RVFV, which primarily circulates in livestock). For all six viruses, humans are  
103 dead-end or unimportant reservoir hosts [28,32], in contrast to pathogens like malaria, dengue  
104 virus, yellow fever virus, and Ross River virus, which sustain infection cycles between humans  
105 and mosquitoes [28,33,34]. Most transmission of RVFV to humans occurs through direct contact  
106 with infected livestock (that are infected by mosquitoes), and to a lesser extent via the mosquito-  
107 borne transmission from infected vectors [32].

| Vector / Pathogen            | WNV      | SLEV | EEEV    | WEEV    | SINV    | RVFV    |
|------------------------------|----------|------|---------|---------|---------|---------|
| <i>Cx. pipiens</i>           | hatched  |      |         |         | hatched | grey    |
| <i>Cx. quinquefasciatus</i>  | PDR only | grey |         |         |         | grey    |
| <i>Cx. tarsalis</i>          | hatched  | grey |         | hatched |         |         |
| <i>Cx. univittatus</i>       | hatched  |      |         |         | grey    |         |
| <i>Cx. torrentium</i>        |          |      |         |         | grey    |         |
| <i>Cx. theileri</i>          |          |      |         |         | grey    | grey    |
| <i>Cx. poicilipes</i>        |          |      |         |         |         | grey    |
| <i>Cx. tritaeniorhynchus</i> |          |      |         |         | grey    |         |
| <i>Ae. taeniorhynchus</i>    |          |      |         |         | hatched | hatched |
| <i>Ae. triseratus</i>        |          |      | hatched |         |         |         |
| <i>Ae. sollicitans</i>       |          |      | grey    |         |         |         |
| <i>Ae. vexans</i>            |          |      |         |         |         | grey    |
| <i>Ae. mcintoshi</i>         |          |      |         |         |         |         |
| <i>Ae. ochraceus</i>         |          |      |         |         |         | grey    |
| <i>Cq. perturbans</i>        |          |      |         |         | grey    | grey    |
| <i>Cu. melanura</i>          |          |      | grey    | grey    |         |         |

108

109 **Figure 1: Viruses transmitted by a community of vectors.** The six viruses in this study (WNV  
110 = West Nile virus, SLEV = St. Louis Encephalitis virus, EEEV = Eastern Equine Encephalitis  
111 virus, WEEV = Western Equine Encephalitis virus, SINV = Sindbis virus, RVFV = Rift Valley  
112 Fever virus) and the *Culex* (*Cx.*), *Aedes* (*Ae.*), *Coquillettidia* (*Cq.*), and *Culiseta* (*Cs.*) vectors  
113 that are important for sustaining transmission to humans. Grey shading indicates an important  
114 vector-virus pair; hatching indicates available temperature-dependent data for infection traits  
115 (parasite development rate [*PDR*] and vector competence [*bc* or *b* and *c*]). The importance of  
116 each vector for transmission may vary over the geographic range of the virus. Infection data were  
117 available for SINV and RVFV in *Ae. taeniorhynchus*, although this North American mosquito  
118 does not occur in the endemic range of these pathogens. Data sources: [25–27,32,76].

TABLE 1:

| Virus ( <i>genus</i> )                                                                   | Primary vector <i>spp.</i>                                                                                                                       | Geographic range                                                              | Presentation & mortality                                                                                                                                       | Epidemiology & Ecology                                                                                                                                                                                                                                                                                                                                                                                                                                               |
|------------------------------------------------------------------------------------------|--------------------------------------------------------------------------------------------------------------------------------------------------|-------------------------------------------------------------------------------|----------------------------------------------------------------------------------------------------------------------------------------------------------------|----------------------------------------------------------------------------------------------------------------------------------------------------------------------------------------------------------------------------------------------------------------------------------------------------------------------------------------------------------------------------------------------------------------------------------------------------------------------|
| West Nile virus (WNV, <i>Flavivirus</i> )                                                | <i>Cx. pipiens</i> , <i>Cx. quinquefasciatus</i> , <i>Cx. tarsalis</i>                                                                           | Globally distributed                                                          | Febrile illness and encephalitis. 10% mortality in neuro-invasive cases. Long-term physical & cognitive disabilities.                                          | The most common mosquito-borne disease in North America. Since invading in 1999, 7 million estimated infections, 22,999 neuro-invasive cases, and 2,163 deaths in US; 5,614 reported cases in Canada. Typically 100-300 cases annually in Europe, but over 1500 in 2018. Poor surveillance in Africa, but seroprevalence ~80% in some areas. Birds are main reservoir/amplification hosts.                                                                           |
| St. Louis Encephalitis virus (SLEV, <i>Flavivirus</i> )                                  | <i>Cx. quinquefasciatus</i> , <i>Cx. tarsalis</i>                                                                                                | Western hemisphere; western, midwestern, & southern US                        | Encephalitis. 5-15% mortality in diagnosed cases.                                                                                                              | 92 cases and 6 deaths recorded in US from 2009-2018. Birds are main reservoir/amplification hosts.                                                                                                                                                                                                                                                                                                                                                                   |
| Eastern Equine Encephalitis virus (EEEV, <i>Alphavirus</i> )                             | <i>Ae. triseriatus</i> , <i>Cs. melanura</i>                                                                                                     | Western hemisphere; eastern & midwestern US                                   | Febrile illness and encephalitis. 33% mortality in diagnosed cases. Long-term cognitive disabilities.                                                          | 73 cases and 30 deaths recorded in US from 2009-2018. Birds are main reservoir/amplification hosts.                                                                                                                                                                                                                                                                                                                                                                  |
| Western Equine Encephalitis virus (WEEV, <i>Alphavirus</i> )                             | <i>Cx. tarsalis</i>                                                                                                                              | Western hemisphere; western & midwestern US                                   | Febrile illness and encephalitis. Low mortality, except in infants.                                                                                            | The CDC does not report WEEV infection. Birds are main reservoir/amplification hosts. WEEV is derived from a recombinant event between the ancestors of EEEV and SINV.                                                                                                                                                                                                                                                                                               |
| Sindbis virus (SINV, <i>Alphavirus</i> ), also called Pogosta, Ockelbo, & Karelian Fever | <i>Cx. torrentium</i> , <i>Cx. pipiens</i> , <i>Cx. univittatus</i>                                                                              | Europe, Africa, Asia & Australia, primarily northern Europe & southern Africa | Febrile illness, rash, and joint pain. No mortality, but long-term disability.                                                                                 | Poor surveillance except in Finland, where annual incidence is 2-26 per 100,000 people and seroprevalence can reach ~40%. Birds are main reservoir/amplification hosts. Long-distance migratory birds may spread the virus between temperate zones in Northern and Southern hemispheres.                                                                                                                                                                             |
| Rift Valley Fever virus (RVFV, <i>Phlebovirus</i> )                                      | <i>Ae. mcintoshi</i> , <i>Ae. ochraceus</i> , <i>Ae. vexans</i> , <i>Cx. pipiens</i> , <i>Cx. poicilipes</i> , <i>Cx. theileri</i> and many more | Africa & the Middle East                                                      | Febrile illness and encephalitis. <1% mortality in total cases. 50% mortality in hemorrhagic cases, permanent blindness in 50% of ocular cases (<2% of cases). | Livestock are main reservoir/amplification hosts, and suffer mortality and abortion after being infected by mosquitoes. Most transmission to humans occurs via direct contact with infected livestock. Vertical transmission in vectors (via dormant eggs) can initiate epidemics. In eastern and southern Africa, there are large epidemics every 5-15 years driven by rainfall and blooms of <i>Ae. spp.</i> from low-lying flooded areas known as <i>dambos</i> . |

119  
 120 **Table 1: Properties of six viruses transmitted by an overlapping network of mosquito**  
 121 **vectors.** Sources: WNV [24,25,140,147–150]; SLEV [25,29]; EEEV [25,30]; WEEV [25]; SINV  
 122 [26]; RVFV [27,32,76,151].



123 We primarily focus on *Culex pipiens*, *Cx. quinquefasciatus*, and *Cx. tarsalis*, well-studied  
124 species that are important vectors for many of the viruses and for which appropriate temperature-  
125 dependent data exist for nearly all traits relevant to transmission. Although the closely-related  
126 *Cx. pipiens* and *Cx. quinquefasciatus* overlap in their home ranges in Africa, they have expanded  
127 into distinct regions globally (Fig 2) [35]. *Cx. pipiens* occurs in higher-latitude temperate areas in  
128 the Northern and Southern hemisphere, while *Cx. quinquefasciatus* occurs in lower-latitude  
129 temperate and tropical areas (Fig 2A). By contrast, *Cx. tarsalis* is limited to North America but  
130 spans the tropical-temperate gradient (Fig 2B). In this system of shared pathogens and vectors  
131 with distinct geographical distributions, we also test the hypothesis that differences in thermal  
132 performance underlie variation in vector and pathogen geographic distributions, since temperate  
133 environments have cooler temperatures and a broader range of temperatures than tropical  
134 environments. We also include thermal responses from other relevant vector or laboratory model  
135 species in some models: *Aedes taeniorhynchus* (SINV and RVFV), *Ae. triseriatus* (EEEV), *Ae.*  
136 *vexans* (RVFV), *Cx. theileri* (RVFV), and *Culiseta melanura* (EEEV). Additionally, we compare  
137 our results to previously published models [2–4,6,7] for transmission of more tropical diseases  
138 by the following vectors: *Ae. aegypti*, *Ae. albopictus*, *Anopheles* spp., and *Cx. annulirostris*.

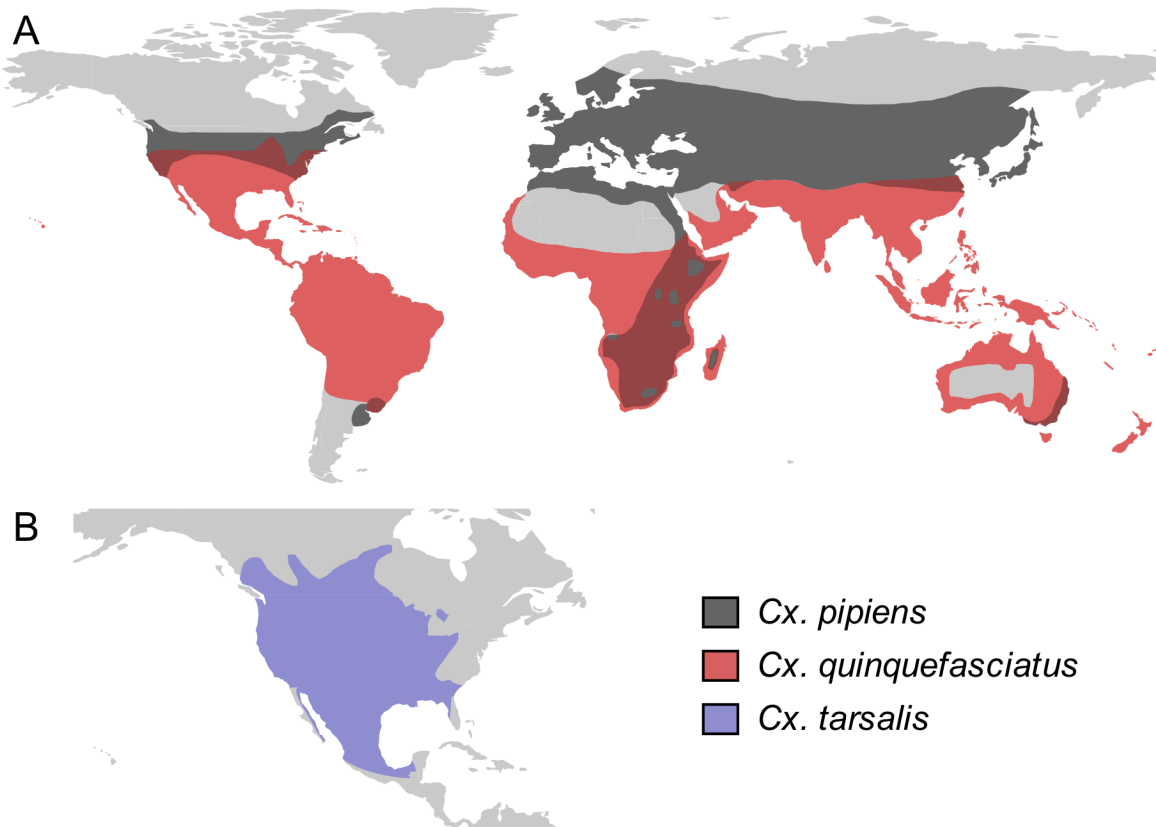

139

140 **Figure 2: *Culex* spp. vectors of West Nile and other viruses have distinct but overlapping**

141 **geographic distributions.** The geographic distribution of the primary vectors of West Nile

142 virus: (A) *Culex pipiens* (dark grey) and *Cx. quinquefasciatus* (red), adapted from [35,83]; (B)

143 *Cx. tarsalis* (blue), northern boundary from [84], southern boundary based on data from the

144 Global Biodiversity Information Facility. Figure created by Michelle Evans for this paper.

145

146 We use a mechanistic approach to characterize the effects of temperature on vector–virus

147 pairs in this network using the thermal responses of traits that drive transmission. Specifically,

148 we use experimental data to measure the thermal responses of the following traits: vector

149 survival, biting rate, fecundity, development rate, competence for acquiring and transmitting

150 each virus, and the extrinsic incubation rate of the virus within the vector. We ask: (1) Do these

151 vectors have qualitatively similar trait thermal responses to each other, and to vectors from

152 previous studies? (2) Is transmission of disease by these vectors predicted to be optimized and  
153 limited at similar temperatures, compared to each other and to other mosquito-borne diseases in  
154 previous studies? (3) How do the thermal responses of transmission vary across vectors that  
155 transmit the same virus and across viruses that share a vector? (4) Which traits limit transmission  
156 at low, intermediate, and high temperatures? Broadly, we hypothesize that variation in thermal  
157 responses is predictable based on vectors' and viruses' geographic ranges.

158         Mechanistic models allow us to incorporate nonlinear effects of temperature on multiple  
159 traits, measured in controlled laboratory experiments across a wide thermal gradient, to  
160 understand their combined effect on disease transmission. This approach is critical when making  
161 predictions for future climate regimes because thermal responses are almost always nonlinear,  
162 and therefore current temperature–transmission relationships may not extend into temperatures  
163 beyond those currently observed in the field. We use Bayesian inference to quantify uncertainty  
164 and to rigorously incorporate prior knowledge of mosquito thermal physiology to constrain  
165 uncertainty when data are sparse [3]. The mechanistic modeling approach also provides an  
166 independently-generated, *a priori* prediction for the relationship between temperature and  
167 transmission to test with observational field data on human cases, allowing us to connect data  
168 across scales, from individual-level laboratory experiments, to population-level patterns of  
169 disease transmission, to climate-driven geographic variation across populations. Using this  
170 approach, we build mechanistic models for 10 vector–virus pairs by estimating thermal  
171 responses of the traits that drive transmission. We validate the models using observations of  
172 human cases in the US over space (county-level) and time (month-of-onset). The validation  
173 focuses on WNV because it is the most common of the diseases we investigated and has the most  
174 complete temperature-dependent trait data.

## 175 **MODEL OVERVIEW**

176 To understand the effect of temperature on transmission and to compare the responses  
177 across vector and virus species, we used  $R_0$ —the basic reproduction number [36]. We use  $R_0$  as a  
178 static, relative metric of temperature suitability for transmission that incorporates the nonlinear  
179 effects of temperature on multiple traits [1,8,37] and is comparable across systems, rather than  
180 focusing on its more traditional interpretation as a threshold for disease invasion into a  
181 susceptible population. Temperature variation creates additional nonlinear effects on  
182 transmission [38–41] that are not well-captured by  $R_0$ , [10,36,42–44] but could be incorporated  
183 in future work by integrating the thermal performance curves fit here over the observed  
184 temperature regime.

185 The basic  $R_0$  model (eq. 1) [37] includes the following traits that depend on temperature  
186 ( $T$ ): adult mosquito mortality ( $\mu$ , the inverse of lifespan [ $l$ ]), biting rate ( $a$ , proportional to the  
187 inverse of the gonotrophic [oviposition] cycle duration), pathogen development rate ( $PDR$ , the  
188 inverse of the extrinsic incubation period: the time required for exposed mosquitoes to become  
189 infectious), and vector competence ( $bc$ , the proportion of exposed mosquitoes that become  
190 infectious). Vector competence is the product of infection efficiency ( $c$ , the proportion of  
191 exposed mosquitoes that develop a disseminated infection) and transmission efficiency ( $b$ , the  
192 proportion of infected mosquitoes that become infectious, with virus present in saliva). Three  
193 parameters do not depend on temperature: mosquito density ( $M$ ), human density ( $N$ ), the rate at  
194 which infected hosts recover and become immune ( $r$ ).

$$195 \quad \text{Basic } R_0: R_0(T) = \left( \frac{a(T)^2 bc(T) e^{-\frac{\mu(T)}{PDR(T)}} M}{N r \mu(T)} \right)^{1/2} \quad \text{eq. 1}$$

196 As in previous work [2–4,6–8,10], we extend the basic  $R_0$  model to account for the effects of  
197 temperature on mosquito density ( $M$ ) via additional temperature-sensitive life history traits (eq.  
198 2): fecundity (as eggs per female per day,  $EFD$ ), egg viability (proportion of eggs hatching into  
199 larvae,  $EV$ ), proportion of larvae surviving to adulthood ( $pLA$ ), and mosquito development rate  
200 ( $MDR$ , the inverse of the development period).

201 Full  $R_0$ :  $R_0(T) = \left( \frac{a(T)^2 bc(T) e^{-\frac{\mu(T)}{PDR(T)}} EFD(T) EV(T) pLA(T) MDR(T)}{N r \mu(T)^3} \right)^{1/2}$  eq. 2

202 Fecundity data were only available as eggs per female per gonotrophic cycle ( $EFGC$ ; for *Cx.*  
203 *pipiens*) or eggs per raft ( $ER$ ; for *Cx. quinquefasciatus*). Thus, we further modified the model to  
204 obtain the appropriate units for fecundity: we added an additional biting rate term to the model  
205 (to divide by the length of the gonotrophic cycle, eqs. S1 and S2) and for *Cx. quinquefasciatus*  
206 we also added a term for the proportion of females ovipositing ( $pO$ ; eq. S2).

207 We parameterized a temperature-dependent  $R_0$  model for each relevant vector–virus pair  
208 using previously published data. We conducted a literature survey to identify studies that  
209 measured the focal traits at three or more constant temperatures in a controlled laboratory  
210 experiment. From these data, we fit thermal responses for each trait using Bayesian inference.  
211 This approach allowed us to quantify uncertainty and formally incorporate prior data [3] to  
212 constrain fits when data for the focal species were sparse or only measured on a limited portion  
213 of the temperature range (see *Material and Methods* for details).

214 For each combination of trait and species, we selected the most appropriate of three  
215 functional forms for the thermal response. As in previous work [2–4,6–8], we fit traits with a  
216 symmetrical unimodal thermal response with a quadratic function (eq. 3) and traits with an  
217 asymmetrical unimodal thermal response with a Brière function [45] (eq. 4). For some

218 asymmetrical responses (e.g., *PDR* for most vector–virus pairs), we did not directly observe a  
219 decrease in trait values at high temperatures due to a limited temperature range. In these cases,  
220 we chose to fit a Brière function based on previous studies with wider temperature ranges [2,4–6]  
221 and thermal biology theory [46]; the upper thermal limit for these fits did not limit transmission  
222 in the  $R_0$  models, and therefore did not impact the results. Unlike in previous work, lifespan data  
223 for all vectors here exhibited a monotonically decreasing thermal response over the range of  
224 experimental temperatures available. We fit these data using a linear function (eq. 5) that  
225 plateaued at coldest observed data point to be conservative. To overwinter, *Cx. pipiens* and *Cx.*  
226 *tarsalis* enter reproductive diapause and hibernate [47,48], and *Cx. pipiens* can survive  
227 temperatures at or near freezing (0°C) for several months [47]. *Cx. quinquefasciatus* enters a  
228 non-diapause quiescent state [48,49] and is likely less tolerant of cold stress, but we wanted a  
229 consistent approach across models and other traits constrained the lower thermal limit of the *Cx.*  
230 *quinquefasciatus*  $R_0$  model to realistic temperatures.

231 Quadratic function:  $f(T) = -q(T - T_{min})(T - T_{max})$  eq. 3

232 Brière function:  $f(T) = q \cdot T(T - T_{min})\sqrt{(T_{max} - T)}$  eq. 4

233 Linear function:  $f(T) = -mT + z$  eq. 5

234 In the quadratic and Brière functions of temperature ( $T$ ), the trait values depend on a lower  
235 thermal limit ( $T_{min}$ ), an upper thermal limit ( $T_{max}$ ), and a scaling coefficient ( $q$ ). In the linear  
236 function, the trait values depend on a slope ( $m$ ) and intercept ( $z$ ).

237 The fitting via Bayesian inference produced posterior distributions for each parameter in  
238 the thermal response functions (eqs. 3–5) for each trait–species combination. These posterior  
239 distributions represent the estimated uncertainty in the parameters. We used these parameter  
240 distributions to calculate distributions of expected mean functions for each trait over a

241 temperature gradient (from 1–45°C by 0.1°C increments). Then we substituted these samples  
242 from the distributions of the mean thermal responses for each trait into eq. 2 to calculate the  
243 posterior distributions of predicted  $R_0$  over this same temperature gradient for each vector–virus  
244 pair (see *Material and Methods* and S1 Text for details). Thus, the estimated uncertainty in the  
245 thermal response of each trait is propagated through to  $R_0$  and combined to produce the estimated  
246 response of  $R_0$  to temperature, including the uncertainty in  $R_0(T)$ .

247 Because the magnitude of realized  $R_0$  depends on system-specific factors like breeding  
248 habitat availability, reservoir and human host availability, vector control, species interactions,  
249 and additional climate factors, we focused on the relative relationship between  $R_0$  and  
250 temperature [8]. We rescaled the  $R_0$  model results to range from 0 to 1 (i.e., ‘relative  $R_0$ ’),  
251 preserving the temperature-dependence (including the absolute thermal limits and thermal  
252 optima) while making each model span the same scale. To compare trait responses and  $R_0$   
253 models, we quantify three key temperature values: the optimal temperature for transmission  
254 ( $T_{opt}$ ) and the lower and upper thermal limits ( $T_{min}$  and  $T_{max}$ , respectively) where temperature is  
255 predicted to prohibit transmission ( $R_0 = 0$ ).

256

## 257 **RESULTS**

### 258 *Trait thermal responses*

259 We fit thermal response functions from empirical data for most of the vector and virus  
260 traits that affect transmission (Table S1 and Fig 1). All mosquito traits were temperature-  
261 sensitive (three main *Culex* species: Fig 3, Fig 4; *Ae. taeniorhynchus*, *Ae. triseriatus*, *Ae. vexans*,  
262 *Cx. theileri*, and *Culiseta melanura*: Fig S1). For most species, the extensive data for larval traits  
263 (mosquito development rate [MDR] and survival [ $pLA$ ]) produced clear unimodal thermal

264 responses with relatively low uncertainty (Fig 3A,B, Fig S1A,B). For biting rate ( $a$ ) and  
265 fecundity traits ( $pO$ ,  $EFGC$ ,  $ER$ ,  $EV$ ), trait data were often more limited and fits were more  
266 uncertain, but still consistent with the expected unimodal thermal responses based on previous  
267 studies [2,4–6] and theory [46] (Fig 3C, Fig 4, Fig S1C-F). However, adult lifespan ( $lf$ ) data  
268 clearly contrasted with expectations from previous studies of more tropical mosquitoes. Lifespan  
269 decreased linearly over the entire temperature range of available data (coldest treatments: 14–  
270 16°C, Fig 3D; 22°C, Fig S1D) instead of peaking at intermediate temperatures (e.g., previously  
271 published optima for more tropical species: 22.2–23.4°C) [2–4,6,7].

272 In general, the adult mosquito traits (biting rate, lifespan, and fecundity [ $a$ ,  $lf$ ,  $pO$ ,  $EFGC$ ,  
273  $ER$ ,  $EV$ ]) varied more among species than the larval traits (development rate and survival [ $MDR$   
274 and  $pLA$ ]), although the high degree of uncertainty resulted in overlapping 95% credible intervals  
275 (CIs) between species for most traits (Fig 3, Fig 4, Fig S1), with two exceptions. First, the  
276 thermal response for lifespan ( $lf$ ) for *Cx. tarsalis* was significantly less steep than the response  
277 for *Cx. pipiens* (Fig 3D; 95% CIs for slope coefficients: *Cx. tarsalis* = 1.12–2.24, *Cx. pipiens* =  
278 3.83–5.84). Second, the symmetry of the unimodal functional form was generally consistent for  
279 each trait across species, with the exceptions that the thermal responses for the proportion  
280 ovipositing ( $pO$ ) and egg viability ( $EV$ ) were symmetrical for *Cx. pipiens* and asymmetrical for  
281 *Cx. quinquefasciatus* (Fig 4 A,C). The lifespan pattern (thermal response of *Cx. tarsalis* less  
282 steep than *Cx. pipiens*) did not match any *a priori* prediction, but the differences for  $pO$  and  $EV$   
283 matched predictions based on the geographic ranges of the vectors: lower-latitude *Cx.*  
284 *quinquefasciatus* performed better at warmer temperatures for  $pO$  (Fig 3A), and higher-latitude



285 *Cx. pipiens* performed better at cooler temperatures for *EV* (Fig 3C).

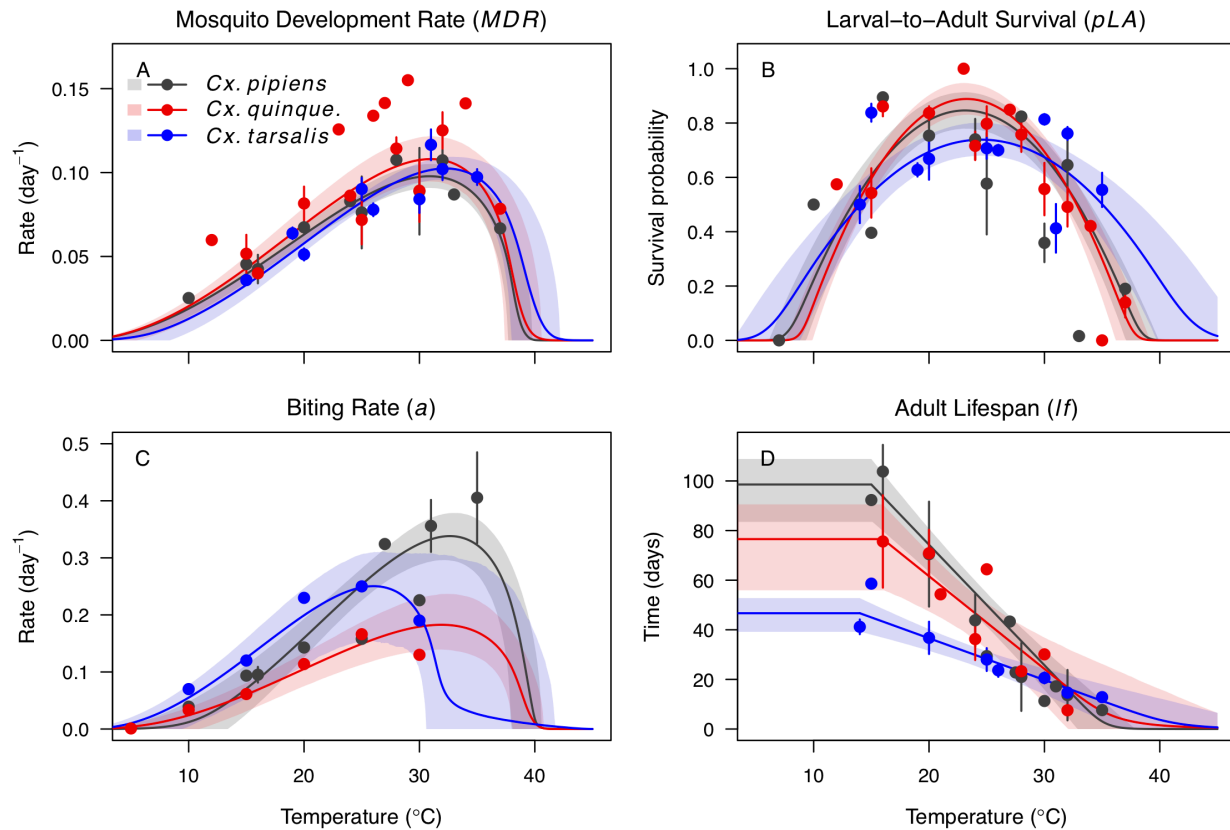

286

287 **Figure 3: *Culex* spp. mosquito traits respond strongly and consistently to temperature.** The  
288 thermal responses of mosquito traits for the North American vectors of West Nile virus: *Culex*  
289 *pipiens* (dark grey), *Cx. quinquefasciatus* (red), and *Cx. tarsalis* (blue). (A) Mosquito  
290 development rate (*MDR*), (B) larval-to-adult survival (*pLA*), (C) biting rate (*a*), and (D) adult  
291 lifespan (*lf*). Points without error bars are reported means from single studies; points with error  
292 bars are averages of means from multiple studies (+/- standard error, for visual clarity only;  
293 thermal responses were fit to reported means, see Figs S2–5). Solid lines are posterior means;  
294 shaded areas are 95% credible intervals of the trait mean. See Fig S1 for thermal responses for  
295 *Aedes taeniorhynchus*, *Aedes triseriatus*, *Ae. vexans*, *Culiseta melanura*.

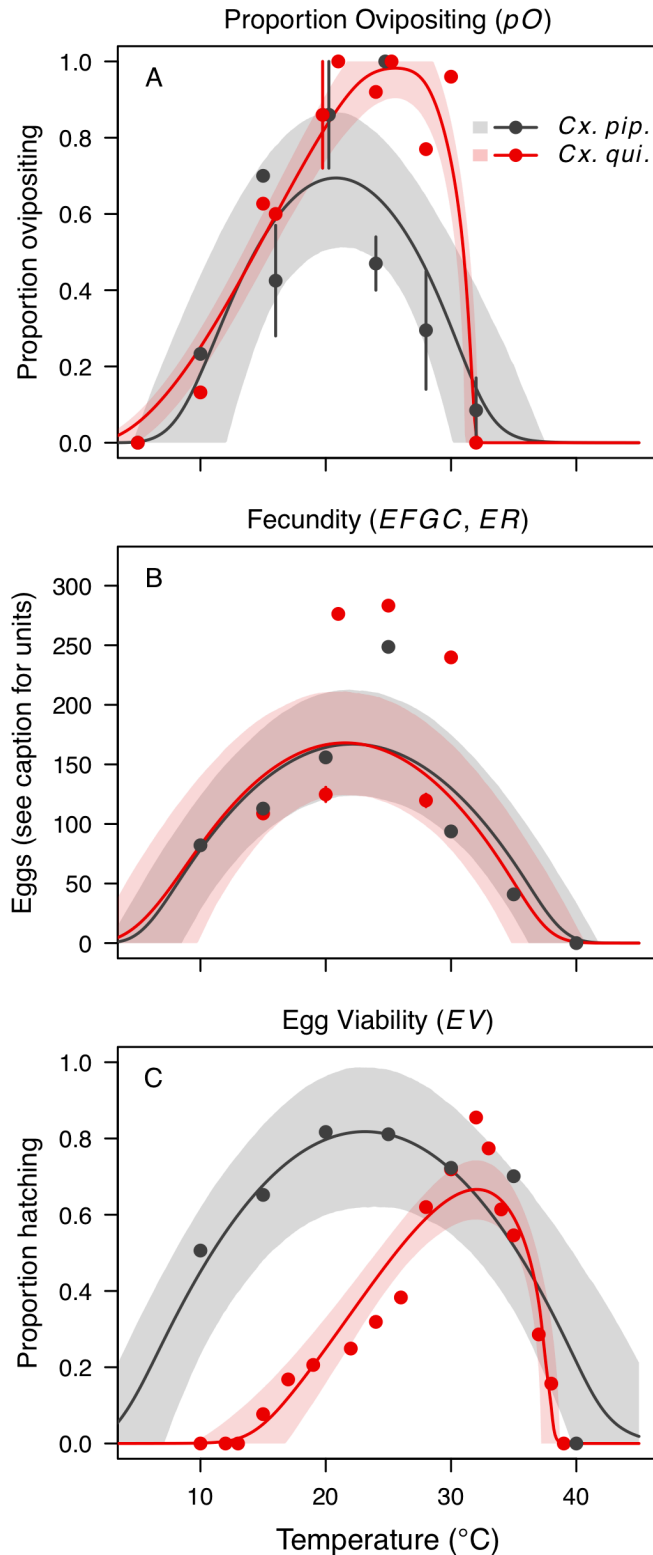

**Figure 4: *Culex pipiens* and *Cx. quinquefasciatus* fecundity traits respond strongly to temperature but with different functional forms.** The thermal responses of mosquito traits for the primary vectors of West Nile virus: *Culex pipiens* (dark grey) and *Cx. quinquefasciatus* (red). (A) Proportion ovipositing ( $pO$ ), (B) fecundity (eggs per female per gonotrophic cycle,  $EFGC$ , or eggs per raft,  $ER$ ), and (C) egg viability ( $EV$ ). Points without error bars are reported means from single studies; points with error bars are averages of means from multiple studies ( $\pm$  standard error, for visual clarity only; thermal responses were fit to reported means, see Fig S6). Solid lines are posterior distribution means; shaded areas are 95% credible intervals of the trait mean. See Fig S1 for thermal responses for *Ae. vexans*, *Cx. theileri*, and *Culiseta melanura*.

525

324           The thermal responses for pathogen development rate were similar among most vector–  
325 virus pairs (Fig 5), with a few notable exceptions: WNV in *Cx. quinquefasciatus* had a warmer  
326 lower thermal limit (Fig 5A); WNV in *Cx. univittatus* had a cooler optimum and upper thermal  
327 limit (Fig 5A); and SINV in *Ae. taeniorhynchus* had limited data that indicated very little  
328 response to temperature (Fig 5C). By contrast, the thermal response of vector competence varied  
329 substantially across vectors and viruses (Fig 6). For example, infection efficiency (*c*) of *Cx.*  
330 *pipiens* peaked at warmer temperatures for WNV than for SINV (Fig 6A,G; 95% CIs: SINV =  
331 14.1–30.5°C, WNV = 31.9–36.1°C), transmission efficiency (*b*) of *Cx. tarsalis* peaked at warmer  
332 temperatures for WNV and SLEV than for WEEV (Fig 6B,E,H; CIs: WEEV = 19.2–23.2°C,  
333 SLEV = 23.5–29.7°C, WNV = 23.9–29.3°C), and the lower thermal limit for vector competence  
334 (*bc*) for WNV was much warmer in *Cx. pipiens* than in *Cx. univittatus* (Fig 6C; CIs: *Cx.*  
335 *univittatus* = 1.5–7.1°C, *Cx. pipiens* = 15.0–17.9°C). Infection data for RVFV were only  
336 available in *Ae. taeniorhynchus*, a New World species that is not a known vector for the virus in  
337 nature.

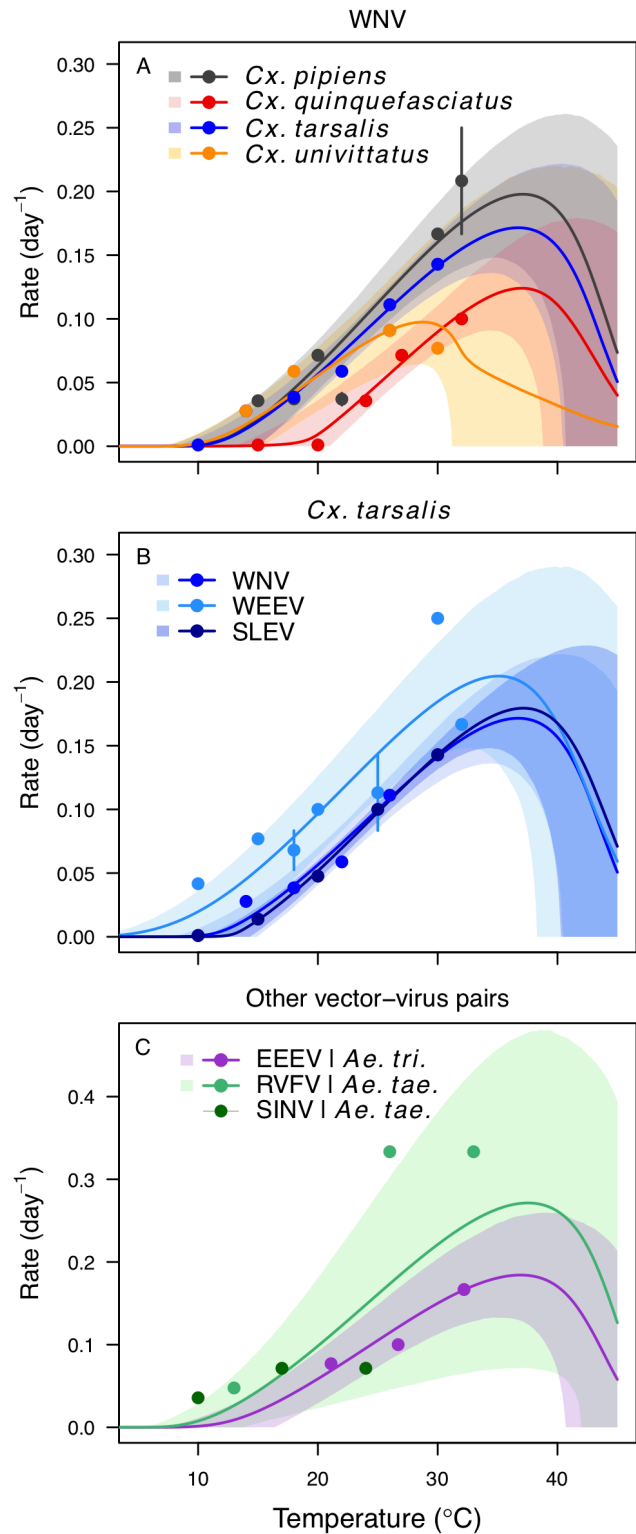

**Figure 5: Pathogen development rates**

**have high thermal optima.** Thermal responses of pathogen development rate (PDR). (A) West Nile virus in *Culex pipiens* (dark grey), *Cx. quinquefasciatus* (red), *Cx. tarsalis* (blue), and *Cx. univittatus* (orange). (B) Three viruses in *Cx. tarsalis*: West Nile virus (same as in A, blue), Western Equine Encephalitis virus (light blue), and St. Louis Encephalitis virus (dark blue). (C) Eastern Equine Encephalitis virus in *Aedes triseriatus* (violet), Rift Valley Fever virus in *Ae. taeniorhynchus* (light green), Sindbis virus in *Ae. taeniorhynchus* (dark green). We did not fit a thermal response for Sindbis virus in *Ae. taeniorhynchus* because the limited data responded weakly to temperature and did not match our priors. We used informative priors based on thermal biology theory and data from other systems to fit the decrease at high temperatures (see *Model Overview*); other traits determined the upper limits of the  $R_0$  models. Points without error bars are reported means from single studies; points with error bars are averages of means from multiple studies (+/- standard error, for visual clarity only; thermal responses were fit to reported means, see Fig S7). Solid lines are posterior distribution

367 means; shaded areas are 95% credible intervals of the trait mean.

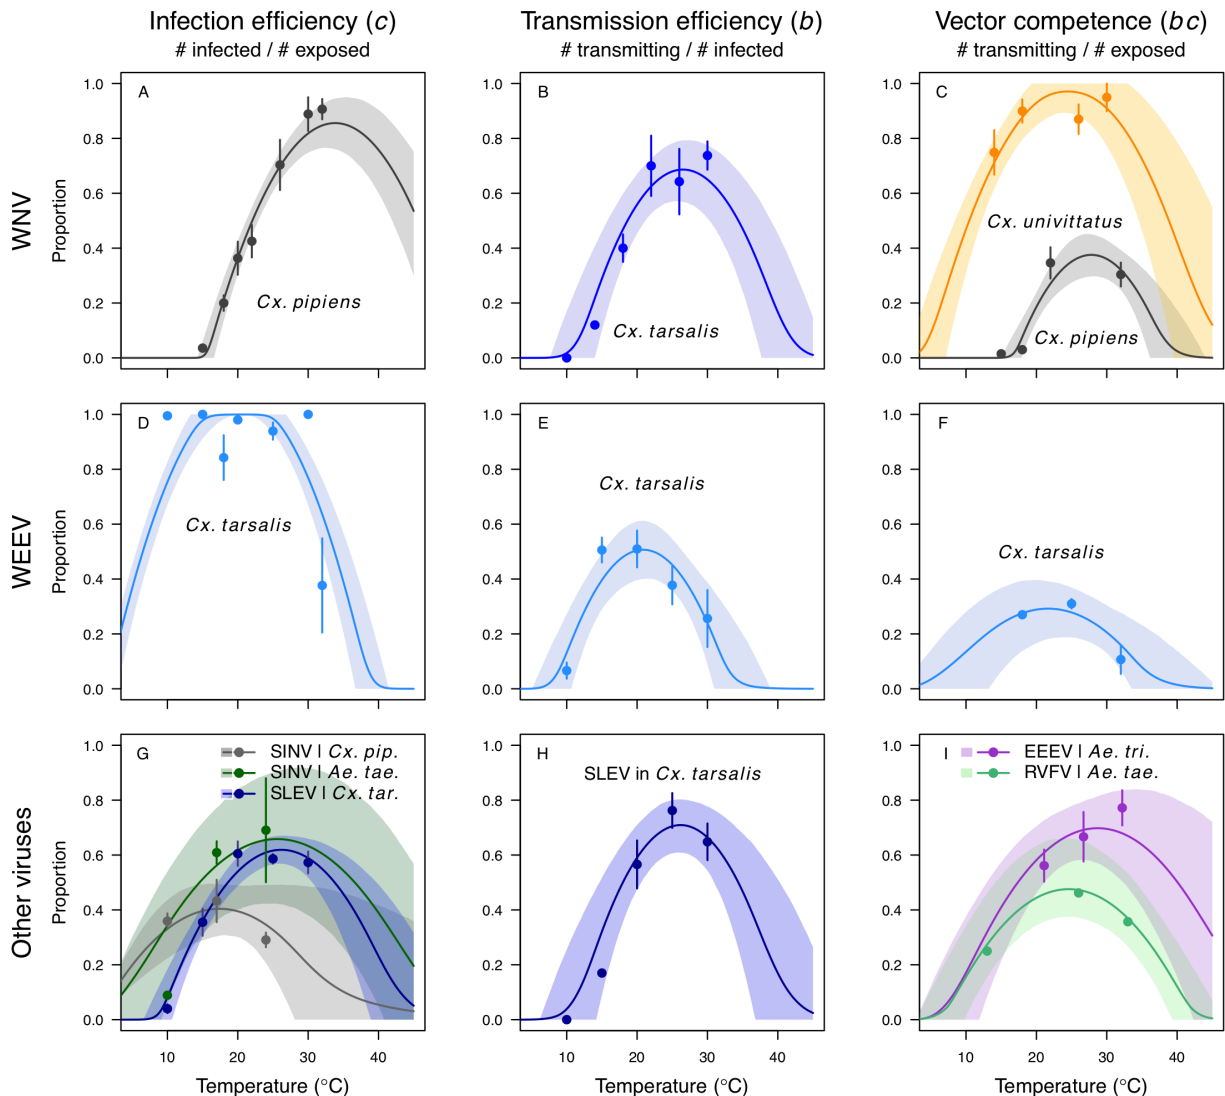

368  
 369 **Figure 6: Vector competence responds strongly to temperature and varies across vector**  
 370 **and virus species.** Thermal responses of infection efficiency (*c*, # infected / # exposed; first  
 371 column), transmission efficiency (*b*, # transmitting / # infected; second column) or vector  
 372 competence (*bc*, # infected / # exposed; third column) for vector–virus pairs. First row (A,B,C):  
 373 West Nile virus in *Culex pipiens* (dark grey), *Cx. tarsalis* (blue), and *Cx. univittatus*  
 374 (yellow/orange). Second row: (D,E,F) Western Equine Encephalitis virus in *Cx. tarsalis* (light  
 375 blue). Third row (G,H,I): Sindbis virus in *Aedes taeniorhynchus* (dark green), Sindbis virus in  
 376 *Cx. pipiens* (light gray), St. Louis Encephalitis virus in *Cx. tarsalis* (dark blue), Eastern Equine  
 377 Encephalitis virus in *Ae. triseriatus* (violet), and Rift Valley Fever virus in *Ae. taeniorhynchus*  
 378 (light green). Points are means of replicates from single or multiple studies (+/- standard error,  
 379 for visual clarity only; thermal responses were fit to replicate-level data, see Fig S8, Fig S9).  
 380 Solid lines are posterior distribution means; shaded areas are 95% credible intervals of the trait  
 381 mean.

## 382 *Temperature-dependent $R_0$ models*

383           Relative  $R_0$  responded unimodally to temperature for all the vector–virus pairs, with  
384 many peaking at fairly cool temperatures (medians: 22.7–26.0°C, see Table 2 for CIs; Fig 7). The  
385 lower thermal limits (medians: 8.7–19.0°C, see Table 2 for CIs; Fig 7) were more variable than  
386 the optima or the upper thermal limits (medians: 31.9–37.8°C, see Table 2 for CIs; Fig 7),  
387 although confidence intervals overlapped in most cases because lower thermal limits also had  
388 higher uncertainty (Fig 7). The *Ae. taeniorhynchus* models were clear outliers, with much  
389 warmer distributions for the upper thermal limits, and optima that trended warmer as well.

390           Differences in relative  $R_0$  stemmed from variation both in vector traits (e.g., in Fig 7A,  
391 with WNV in different vector species) and in virus infection traits (e.g., in Fig 7B, with different  
392 viruses in *Cx. tarsalis*). The upper thermal limit was warmer for WNV transmitted by *Cx. pipiens*  
393 (34.9°C [CI: 32.9–37.5°C]) than by *Cx. quinquefasciatus* (31.8°C [CI: 31.1–32.2°C]), counter to  
394 the *a priori* prediction based on vector geographic ranges. This result implies that warming from  
395 climate change may differentially impact transmission by these two vectors. Additionally, the  
396 lower thermal limit for WNV varied widely (but with slightly overlapping 95% CIs) across  
397 different vector species (Fig 7D), from 19.0°C (14.2–21.0°C) in *Cx. quinquefasciatus* to 16.8°C  
398 (14.9–17.8°C) in *Cx. pipiens* to 12.2°C (9.7–15.3°C) in *Cx. tarsalis* to 11.1°C (8.1–15.4°C) in *Cx.*  
399 *univittatus* (an African and Eurasian vector; Table 2). Based on these trends in the thermal limits  
400 of  $R_0$ , the seasonality of transmission and the upper latitudinal and elevational limits could vary  
401 for WNV transmitted by these different species.

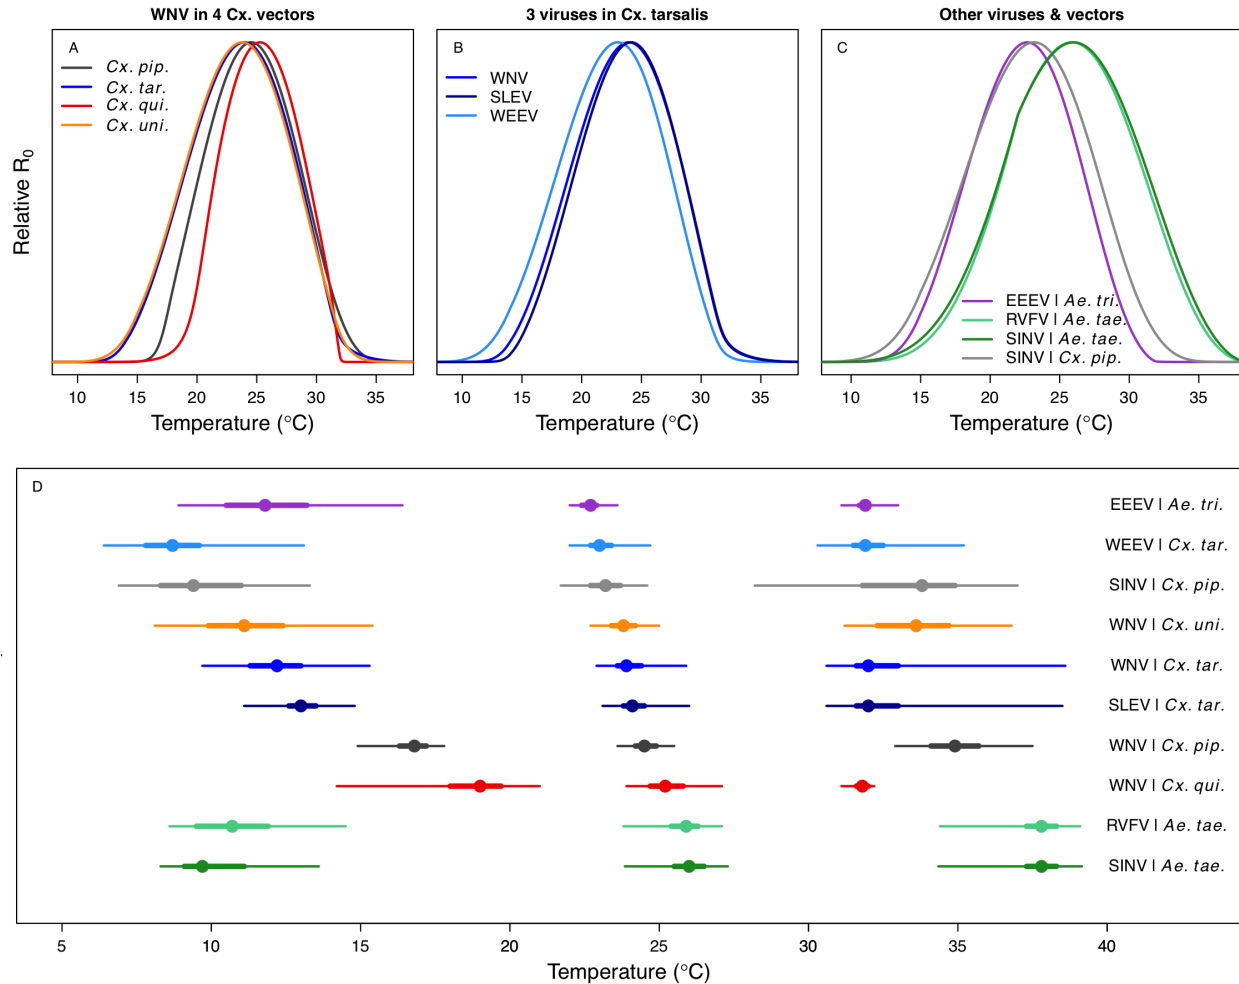

402

403 **Figure 7: Unimodal thermal responses of transmission (relative  $R_0$ ) for ten vector-virus**  
 404 **pairs.** Posterior mean relative  $R_0$  for (A) West Nile virus (WNV) in *Culex pipiens* (dark grey),  
 405 *Cx. tarsalis* (blue), *Cx. quinquefasciatus* (red), and *Cx. univittatus* (orange); (B) three viruses in  
 406 *Cx. tarsalis*: WNV (same as in A, blue), Western Equine Encephalitis virus (WEEV, light blue),  
 407 and St. Louis Encephalitis virus (SLEV, dark blue); (C) Sindbis virus (SINV) in *Aedes*  
 408 *taeniorhynchus* (dark green) and *Cx. pipiens* (light grey), Rift Valley Fever virus (RVFV) in *Ae.*  
 409 *taeniorhynchus* (light green), and Eastern Equine Encephalitis virus (EEEV) in *Ae. triseriatus*  
 410 (violet). (D) Posterior median and uncertainty estimates for the lower thermal limit, optimum,  
 411 and upper thermal limit. Points show medians, thick lines show middle 50% density, thin lines  
 412 show 95% credible intervals. Models are ordered by increasing median optimal temperature.



TABLE 2:

| $R_0$ Model                        | $T_{min}$ (°C)     | Optimum (°C)       | $T_{max}$ (°C)     | Thermal breadth (°C) |
|------------------------------------|--------------------|--------------------|--------------------|----------------------|
| <i>From this study:</i>            |                    |                    |                    |                      |
| EEEV in <i>Ae. triseriatus</i>     | 11.7 (8.8 – 16.3)  | 22.7 (22.0 – 23.6) | 31.9 (31.1 – 33.0) | 20.0 (15.4 – 23.0)   |
| WEEV in <i>Cx. tarsalis</i>        | 8.6 (6.3 – 13.0)   | 23.0 (22.0 – 24.7) | 31.9 (30.3 – 35.2) | 23.3 (18.2 – 27.0)   |
| SINV in <i>Cx. pipiens</i>         | 9.4 (6.9 – 13.3)   | 23.2 (21.7 – 24.6) | 33.8 (28.2 – 37.0) | 23.8 (17.3 – 28.6)   |
| WNV in <i>Cx. univittatus</i>      | 11.0 (8.0 – 15.3)  | 23.8 (22.7 – 25.0) | 33.6 (31.2 – 36.9) | 22.5 (18.2 – 26.3)   |
| WNV in <i>Cx. tarsalis</i>         | 12.1 (9.6 – 15.2)  | 23.9 (22.9 – 25.9) | 32.0 (30.6 – 38.6) | 20.1 (16.3 – 26.7)   |
| SLEV in <i>Cx. tarsalis</i>        | 12.9 (11.0 – 14.8) | 24.1 (23.1 – 26.0) | 32.0 (30.6 – 38.5) | 19.2 (16.5 – 25.6)   |
| WNV in <i>Cx. pipiens</i>          | 16.8 (14.9 – 17.8) | 24.5 (23.6 – 25.5) | 34.9 (32.9 – 37.6) | 18.2 (15.8 – 21.2)   |
| WNV in <i>Cx. quinquefasciatus</i> | 19.0 (14.1 – 20.9) | 25.2 (23.9 – 27.1) | 31.8 (31.1 – 32.2) | 12.7 (10.6 – 17.6)   |
| RVFV in <i>Ae. taeniorhynchus</i>  | 10.6 (8.6 – 14.4)  | 25.9 (23.8 – 27.1) | 37.8 (34.4 – 39.1) | 27.0 (21.8 – 29.7)   |
| SINV in <i>Ae. taeniorhynchus</i>  | 9.7 (8.3 – 13.6)   | 26.0 (23.9 – 27.3) | 37.8 (34.4 – 39.2) | 27.7 (22.6 – 30.0)   |
| <i>From previous studies:</i>      |                    |                    |                    |                      |
| Falciparum malaria [3]             | 19.1 (16.0 – 23.2) | 25.4 (23.9 – 27.0) | 32.6 (29.4 – 34.3) | 13.2 (8.3 – 17.1)    |
| DENV in <i>Ae. albopictus</i> [4]  | 16.2 (13.0 – 19.8) | 26.4 (25.4 – 27.6) | 31.4 (29.5 – 34.0) | 15.2 (11.2 – 19.3)   |
| Ross River virus [6]               | 17.0 (15.8 – 18.0) | 26.4 (26.0 – 26.6) | 31.4 (30.4 – 33.0) | 14.2 (12.8 – 16.2)   |
| ZIKV in <i>Ae. aegypti</i> [7]     | 22.8 (20.5 – 23.8) | 28.9 (28.2 – 29.6) | 34.5 (34.1 – 36.2) | 11.7 (10.4 – 14.5)   |
| DENV in <i>Ae. aegypti</i> [4]     | 17.8 (14.6 – 21.2) | 29.1 (28.4 – 29.8) | 34.5 (34.1 – 35.8) | 16.7 (13.2 – 20.2)   |

413

414 **Table 2: Thermal optima and limits for transmission of mosquito-borne pathogens.** Median  
 415 temperature of the lower thermal limit ( $T_{min}$ ), optimum, and upper thermal limit ( $T_{max}$ ), with 95%  
 416 credible intervals in parentheses.

417

418 Different traits determined the lower and upper thermal limits and optimum for  
 419 transmission across vector–virus pairs. The lower thermal limit for transmission was most often  
 420 determined by parasite development rate ( $PDR$ ; WNV and SLEV in *Cx. tarsalis*, WNV in *Cx.*  
 421 *quinquefasciatus*) or biting rate ( $a$ ; WNV in *Cx. univittatus*, WEEV in *Cx. tarsalis*, EEEV in *Ae.*  
 422 *triseriatus*, RVFV and SINV in *Ae. taeniorhynchus*, SINV in *Cx. pipiens*; Figs S12–20), which  
 423 tend to respond asymmetrically to temperature, with high optima. However, vector competence  
 424 ( $bc$ ) determined the lower limit for WNV in *Cx. pipiens* (Fig S11). The upper thermal limit was  
 425 determined by biting rate ( $a$ ) for the three *Cx. tarsalis* models and by adult lifespan ( $lf$ ) for all  
 426 others, although proportion ovipositing ( $pO$ ) was also important for WNV in *Cx.*  
 427 *quinquefasciatus* (Figs S11–S20). In all models, lifespan ( $lf$ ) and biting rate ( $a$ ) had the strongest  
 428 impact on the optimal temperature for transmission, with biting rate increasing transmission at



429 low temperatures and lifespan decreasing transmission at high temperatures (Figs S11-S20). This  
430 result is consistent with previous mechanistic models of tropical mosquito-borne diseases,  
431 despite the qualitative difference in the shape of the lifespan thermal response between those  
432 tropical mosquitoes and the more temperate mosquitoes investigated here [2–4,6,7].

433

#### 434 *Model validation with human case data*

435 We validated the  $R_0$  models for WNV with independent data on human cases because the  
436 temperature-dependent trait data for those models were relatively high quality and because  
437 human case data were available from the Centers for Disease Control and Prevention across a  
438 wide climatic gradient in the contiguous United States. We averaged county-level incidence and  
439 mean summer temperatures from 2001–2016 to estimate the impact of temperature over space,  
440 while ignoring interannual variation in disease that is largely driven by changes in host immunity  
441 and drought [5]. We used generalized additive models (GAMs, which produce flexible,  
442 smoothed responses) to ask: does average incidence respond unimodally to mean summer  
443 temperature? If so, what is the estimated optimal temperature for transmission? Can we detect  
444 upper or lower thermal limits for transmission? Incidence of human neuroinvasive West Nile  
445 disease responded unimodally to average summer temperature and peaked at 24°C (23.5–24.2°C  
446 depending on the spline settings; Fig 8, Fig S24), closely matching the optima from the  
447 mechanistic models for the three North American *Culex* species (23.9–25.2°C; Table 2).  
448 However, the human disease data did not show evidence for lower or upper thermal limits: mean  
449 incidence remained positive and with relatively flat slopes below ~19°C and above ~28°C,  
450 although sample size was very low above 28°C and below 15°C resulting in wide confidence  
451 intervals (Fig 8, Fig S24).

452 We used national month-of-onset data for WNV, EEEV, and SLEV to ask: is the  
453 seasonality of incidence consistent with our models for temperature-dependent transmission?  
454 The month-of-onset for cases of WNV was consistent with predicted transmission,  $R_0(T)$  (Fig 9).  
455 As expected (based on previous studies and the time required for mosquito populations to  
456 increase, become infectious, and bite humans, and for humans to present symptoms and seek  
457 medical care [4,6]), there was a two-month lag between initial increases in  $R_0(T)$  and incidence:  
458 cases began rising in June to the peak in August. The dramatic decline in transmission between  
459 September and October corresponds also closely to the predicted decline in relative  $R_0$ , but  
460 without the expected lag. In general, the seasonal patterns of SLEV and EEEV incidence were  
461 similar to WNV, but differed by three orders of magnitude from ~20,000 cases of WNV to ~40-  
462 50 cases of EEEV and SLEV during the peak month (Fig 9). However, transmission of SLEV  
463 and EEEV are predicted to begin increasing one month earlier than WNV (March versus April,  
464 Fig 9), because the mechanistic models predict that the lower thermal limits for SLEV and EEEV  
465 are cooler than those for WNV in two of the three North American vectors (*Cx. pipiens* and *Cx.*  
466 *quinquefasciatus*, Fig 7). The month-of-onset data partially support this prediction, as cases of  
467 SLEV (but not EEEV) disease begin to increase earlier in the year than WNV, relative to the  
468 summer peak.

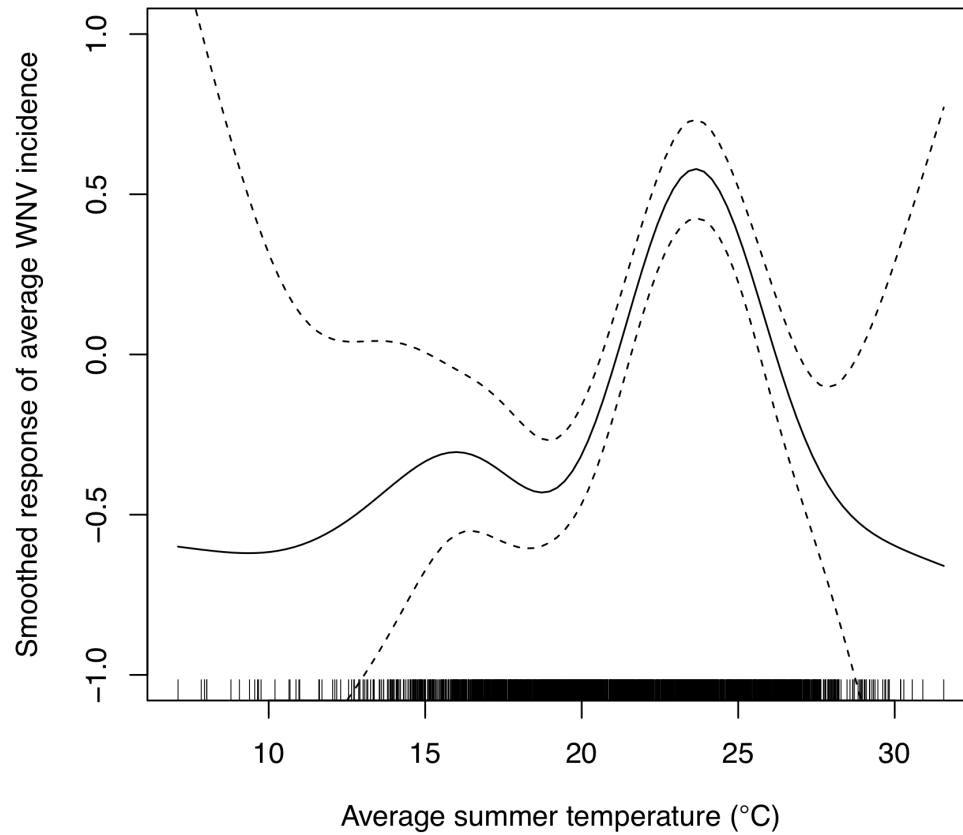

469

470 **Figure 8: Incidence of human neuro-invasive West Nile disease across US counties**  
471 **responds unimodally to temperature, peaking at 24°C.** A generalized additive model (GAM)  
472 was fit to county-level data ( $n = 3,109$ ) of mean temperature from May-September and incidence  
473 of neuro-invasive West Nile disease, both averaged from 2001-2016. See Fig S24 for fits across  
474 a range of smoothing parameters.

475

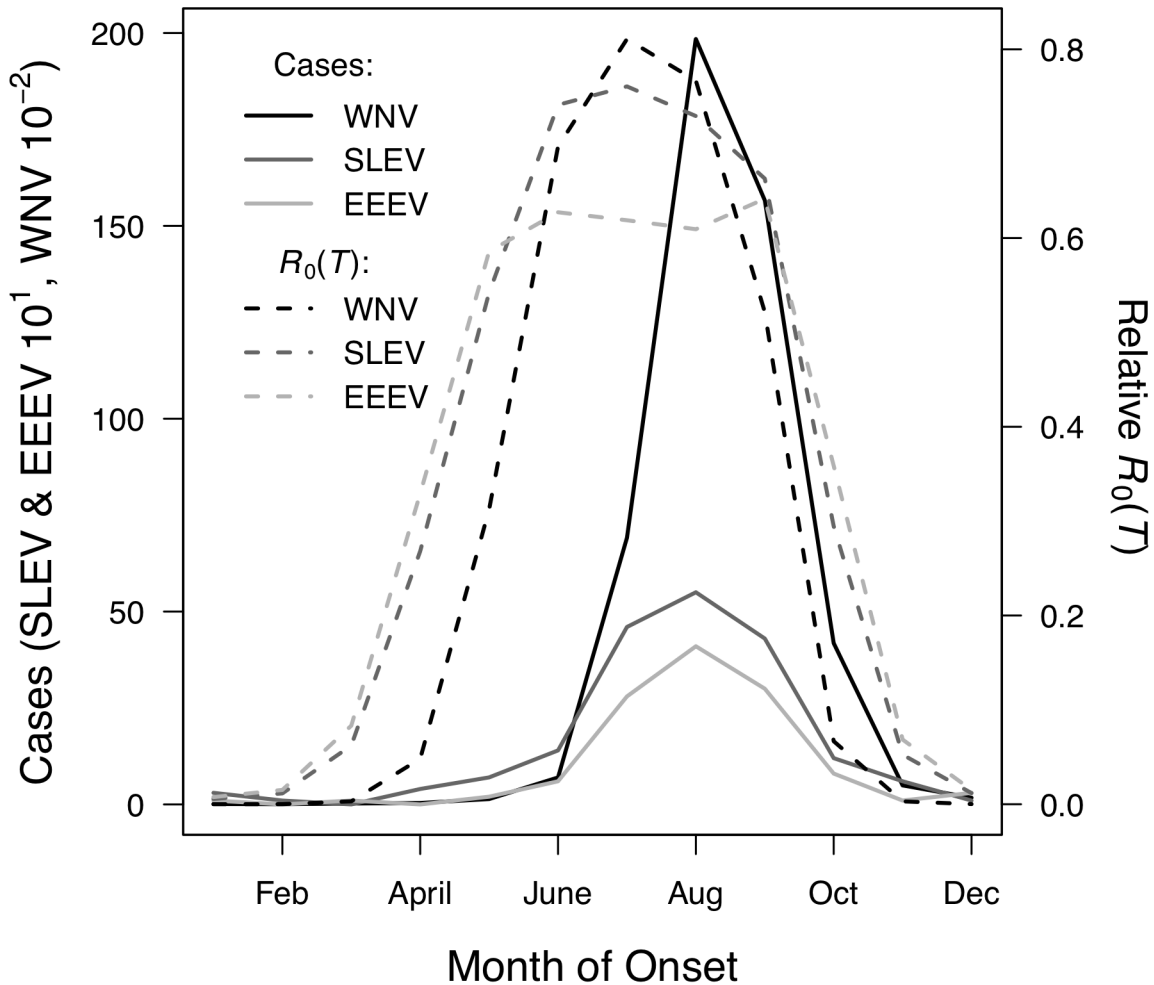

476

477 **Figure 9: Temperature shapes the seasonal pattern of human cases of mosquito-borne viral**

478 **diseases.** Incidence (solid lines) lags behind predicted temperature-dependent  $R_0$  (dashed lines)

479 for human cases of neuro-invasive disease caused by West Nile virus (WNV, black), St. Louis

480 encephalitis virus (SLEV, dark gray), and Eastern Equine Encephalitis virus (EEEV, light gray)

481 by 2 months. This lag matches patterns in other mosquito-borne diseases, and is caused by the

482 time required for mosquito populations to increase, become infectious, and bite humans, and for

483 humans to present symptoms and seek medical care.

484

## 485 **DISCUSSION**

486           As climate changes, it is critical to understand how changes in temperature will affect the  
487 transmission of mosquito-borne diseases. Toward this goal, we developed temperature-  
488 dependent, mechanistic transmission models for 10 vector–virus pairs. The viruses—West Nile  
489 virus (WNV), St. Louis Encephalitis virus (SLEV), Eastern and Western Equine Encephalitis  
490 viruses (EEEV and WEEV), Sindbis virus (SINV), and Rift Valley fever virus (RVFV)—sustain  
491 substantial transmission in temperate areas (except RVFV), and are transmitted by shared vector  
492 species, including *Cx. pipiens*, *Cx. quinquefasciatus*, and *Cx. tarsalis* (except EEEV; Fig 1).  
493 Although most traits responded unimodally to temperature, as expected [2–4,6–8], lifespan  
494 decreased linearly with temperature over the entire temperature range of available data (> 14°C)  
495 for these *Culex* vectors (Fig 3). Transmission responded unimodally to temperature, with the  
496 thermal limits and optima for transmission varying among some of the focal mosquito and virus  
497 species (Fig 7, Table 2), largely due to differences in the thermal responses of mosquito biting  
498 rate, lifespan, vector competence, and parasite development rate. Human case data for WNV  
499 disease across the US exhibited a strong unimodal thermal response (Fig 8), and month-of-onset  
500 data for three viruses was consistent with the predicted seasonality of transmission (Fig 9). Thus,  
501 the mechanistic models captured geographical and seasonal patterns of human incidence, despite  
502 the complexity of the enzootic cycles and spillover into humans. Our analysis was somewhat  
503 limited by the lack of data for several trait-species combinations, or by data that were sparse,  
504 particularly at high temperatures. However, our key results—maximal transmission at  
505 intermediate temperatures—are unlikely to change, and underscore the importance of  
506 considering unimodal thermal responses when predicting how climate change will impact  
507 mosquito-borne disease transmission.

508           The monotonically decreasing thermal responses for lifespan in these more temperate  
509 mosquitoes (Fig 3D) contrast with unimodal responses of more tropical species [2,4,6,8], and  
510 may reflect differing thermal physiology between species that use diapause or quiescence, two  
511 forms of dormancy, to persist over winter and those that do not (see *Model Overview*) [47–49].  
512 *Ae. albopictus*, a species that occurs in both tropical and temperate zones, exhibits a latitudinal  
513 gradient in the United States in which more temperate populations diapause while sub-tropical  
514 populations do not [50]. Experiments could test this hypothesis by measuring whether the  
515 functional form of the thermal response for lifespan differs between northern and southern US  
516 *Ae. albopictus* populations. Despite the difference in the shape of the thermal response, lifespan  
517 played a similarly important role here as in previous studies of mosquito-borne pathogens,  
518 strongly limiting transmission at high temperatures (Figs S11–20). Nonetheless, the linear  
519 thermal responses for lifespan ultimately promotes higher transmission at relatively cool  
520 temperatures because unlike in more tropical species, lifespan did not decline at cool  
521 temperatures within the range measured ( $> 14^{\circ}\text{C}$ ). At more extreme temperatures expected to be  
522 fatal even for diapausing mosquitoes (i.e., below  $0^{\circ}\text{C}$ ), we expect lifespan to eventually decline,  
523 so that the response over broader temperature ranges is likely unimodal.

524           Predicted transmission for many of the diseases in this study peaked at and extended to  
525 cooler temperatures than for previously studied diseases with more tropical distributions (see Fig  
526 7 and Table 2 for 95% credible intervals)[8]. Here, the optimal temperatures for transmission  
527 varied from  $22.7\text{--}25.2^{\circ}\text{C}$  (excluding *Ae. taeniorhynchus* models, Fig 7). By contrast, models  
528 predict that transmission peaks at  $25.4^{\circ}\text{C}$  for malaria [2,3],  $26.4^{\circ}\text{C}$  for Ross River virus [6] and  
529 dengue in *Ae. albopictus* [4],  $28.9^{\circ}\text{C}$  for Zika in *Ae. aegypti* [4], and  $29.1^{\circ}\text{C}$  for dengue in *Ae.*  
530 *aegypti* [4,7]. Many models also had cooler lower thermal limits (medians:  $8.7\text{--}19.0^{\circ}\text{C}$ ) than

531 those of diseases with more tropical distributions (medians: 16.0–17.8°C)[8]. In combination  
532 with similar upper thermal limits (see below), these patterns led to wider thermal breadths (18.2–  
533 27.7°C; Fig 7) for most of the viruses here compared to the more tropical pathogens (11.7–  
534 16.7°C), excepting WNV in *Cx. quinquefasciatus* (12.7°C), the vector most restricted to lower  
535 latitude, sub-tropical geographic areas (Fig 2). These results match a previous finding that  
536 temperate insects had wider thermal breadths than tropical insects [51], and likely reflect thermal  
537 adaptation to greater variation in temperature in temperate areas compared to tropical areas [52].  
538 Additionally, SINV—a virus with substantial transmission at very high latitudes in Finland  
539 [26]—had the second coolest lower thermal limit (Fig 7, Table 2). Further, lower-latitude *Cx.*  
540 *quinquefasciatus* outperformed higher-latitude *Cx. pipiens* at warmer temperatures for proportion  
541 ovipositing ( $pO$ ; Fig 3A), while the reverse occurred at cooler temperatures for egg viability ( $EV$ ;  
542 Fig 3C). Collectively, these results imply that, to some extent, measurements of physiological  
543 traits can predict geographic patterns of vectors or disease transmission at broad scales.  
544 However, geographic range differences (Fig 2) did not consistently predict variation in thermal  
545 responses among the *Culex* species in this study (e.g., biting rate [ $a$ , Fig 3C] and adult lifespan  
546 [ $lf$ , Fig 3D]), indicating that life history and transmission trait responses at constant temperatures  
547 do not always predict the geographic distributions of species. Instead, the ability to tolerate  
548 temperature extremes may limit species distributions more than their performance at average or  
549 constant temperatures [53]. Moreover, although diseases like malaria and dengue are generally  
550 considered to be “tropical”, historically their distributions extended further into temperate  
551 regions [54,55]. Thus, current distributions of disease may reflect a realized niche restricted by  
552 social factors more than a fundamental niche based on ecological factors like temperature.

553 In contrast to the optima, lower thermal limits, and thermal breadths, the upper thermal  
554 limits for the vector–virus pairs in this study (31.9–34.9°C, excluding *Ae. taeniorhynchus*  
555 models; Fig 7D, Table 2) closely matched those of more tropical diseases (31.5–34.7°C) [2–  
556 4,6,7]. This similarity likely arises because maximum summer temperatures in temperate areas  
557 can match or even exceed maximum temperatures in tropical areas [52]. Accordingly, there may  
558 be a fundamental upper thermal constraint on transmission that applies similarly to all  
559 mosquitoes-borne diseases, driven by short mosquito lifespans at high temperatures. The  
560 relatively high upper thermal limits in both *Ae. taeniorhynchus* transmission models were driven  
561 by the thermal response of lifespan, which was fit to few data points; more data are needed to  
562 determine if it reflects the true thermal response in that species [Fig S1]. These results indicate  
563 that as temperatures rise due to climate change, temperate diseases are unlikely to be displaced  
564 by warming alone, although they may also expand toward the poles, even as tropical diseases  
565 may expand farther into temperate zones.

566 Independent human case data support unimodal thermal responses for transmission and  
567 the importance of temperature in shaping geographic patterns of mosquito-borne disease. Human  
568 cases of WNV [56–62] and SINV [63,64] are often positively associated with temperature. Here,  
569 we found incidence of neuroinvasive WNV disease peaked at intermediate mean summer  
570 temperatures across counties in the US (Fig 8) that matched the optima predicted by our models.  
571 This result adds to prior evidence for reduced transmission of WNV [65] and other mosquito-  
572 borne diseases [2,16–19] at high temperatures. Although we did not detect lower or upper  
573 thermal limits (Fig 8), this result is unsurprising based on fundamental differences between the  
574 types of temperature data used to parameterize and validate the models. The  $R_0$  model prediction  
575 is derived from data collected in a controlled laboratory environment at constant temperatures,



576 while average incidence in the field reflects temperatures that vary at a variety of temporal scales  
577 (daily, seasonal, and interannual). Thus, we hypothesize that temperature variation over time  
578 may sustain transmission in regions with otherwise unsuitable mean summer temperatures by  
579 providing time windows that are suitable for transmission [38,39,41].

580         The temperature-dependent models also predict the seasonality of human cases of WNV,  
581 EEEV, and SLEV (Fig 9). The 2-month lag between climate suitability and the onset of human  
582 cases, which matches previous results from other mosquito-borne diseases [4,6], arises from the  
583 time following the onset of suitable conditions required for mosquito populations to increase  
584 [66], become infectious, and bite humans, and for humans to present symptoms and seek medical  
585 care [67,68]. Transmission of the more temperate viruses here may incur additional lags because  
586 human cases only result from enzootic transmission and multiple rounds of amplification within  
587 reservoir hosts may be required before prevalence is sufficiently high to spill over into humans.  
588 Additionally, as wild birds disperse in late summer, both *Cx. pipiens* and *Cx. tarsalis* shift their  
589 feeding preferences from birds to humans, increasing transmission to people and influencing the  
590 seasonal dynamics of WNV [69]. Drought, precipitation, and reservoir immunity also strongly  
591 drive transmission of WNV [5,59,60,62] and may interact with temperature. SLEV, EEEV, and  
592 WEEV are less common in nature, and thus less well-studied, but the lower thermal limits in our  
593 study support previous findings that transmission WEEV is favored over SLEV in cooler  
594 conditions [70]. Additionally, the seasonal patterns of incidence data (Fig 9) provide some  
595 support for the model prediction that SLEV transmission is possible at cooler temperatures than  
596 WNV by North American vectors (Table 2). By contrast, mean temperature is not associated  
597 with outbreaks of RVFV, although they are highly predictable based on precipitation driven by  
598 El Niño–Southern Oscillation cycles [71,72]. Thus, disease dynamics depend on the interaction

599 between temperature and other environmental factors, and the relative importance of temperature  
600 versus other drivers varies across systems.

601 Most prior studies with mechanistic models for temperature-dependent transmission of  
602 WNV do not capture the unimodal thermal response that our mechanistic models predict and that  
603 we observe in the human case data (Table 3). Two previous models predicted that transmission  
604 of WNV would increase up to the warmest temperatures they considered, 28°C [73] and 35°C  
605 [74]. In both cases, the daily survival rates estimated from lab experiments were far less sensitive  
606 to temperature than our measure of adult lifespan, and neither model was validated with field  
607 data. A third study with models for *Cx. pipiens*, *Cx. quiquefasciatus*, and *Cx. tarsalis*, like our  
608 study, predicted unimodal thermal responses for transmission, with very similar optima but with  
609 lower thermal limits that were ~5°C warmer, resulting in much narrower thermal breadths (Fig  
610 S22) [5]. This previous model [5] was validated with annual, state-level WNV human case data  
611 (in contrast to our county-level data averaged over multiple years), and detected a positive effect  
612 of temperature, with no decline at high temperatures [5]. The best spatial and temporal scales for  
613 validating temperature-dependent transmission models and detecting the impacts of temperature  
614 remain an open question. For instance, different approaches may be necessary to detect thermal  
615 optima and thermal limits. Critically, differences in modeling and validation approaches can lead  
616 to strongly divergent conclusions and predictions for the impact of climate change.

TABLE 3:

| <b><math>R_0</math> Model</b>              | <b>Optimum (°C)</b> |
|--------------------------------------------|---------------------|
| <i>From this study:</i>                    |                     |
| WNV in <i>Cx. pipiens</i>                  | 24.5                |
| WNV in <i>Cx. quinquefasciatus</i>         | 25.2                |
| WNV in <i>Cx. tarsalis</i>                 | 23.9                |
| WNV in <i>Cx. univittatus</i>              | 23.8                |
| <i>From previous studies:</i>              |                     |
| WNV in <i>Cx. pipiens</i> [5]              | 24.9                |
| WNV in <i>Cx. quinquefasciatus</i> [5]     | 24.3                |
| WNV in <i>Cx. tarsalis</i> [5]             | 24.9                |
| WNV in <i>Cx. pipiens</i> [70]             | 28                  |
| WNV in <i>Cx. pipiens molestus</i> [70]    | 28                  |
| WNV in <i>Cx.</i> and <i>Ae. spp.</i> [71] | 35                  |

617

618 **Table 3: Predicted optima for transmission of West Nile virus.** Predicted optima for  
619 transmission from this study and previous models.

620

621       Given the unimodal relationship between temperature and transmission of these  
622 temperate mosquito-borne pathogens, we expect climate warming to lead to predictable shifts in  
623 disease transmission [20,22,23]. Warming should extend the transmission season earlier into the  
624 spring and later into the fall and increase transmission potential in higher latitudes and altitudes,  
625 although this prediction may be impacted by changes in bird migrations. However, the thermal  
626 optima for these temperate vector–virus pairs are relatively cool, so in many locations, warming  
627 could result in summer temperatures that exceed the thermal optima for transmission more  
628 frequently, reducing overall transmission or creating a bimodal transmission season [75]. Based  
629 on the average summer temperature data (2001–2016) in our analysis (Fig 8), currently the  
630 majority of people (70%) and counties (68%) are below the optimal temperature for transmission  
631 (23.9 °C, fit by the GAM), while 30–32% are above the optimum. The numbers are similar when  
632 restricted to counties with observed West Nile virus cases: 69% and 70%, respectively. Thus, all  
633 else being equal, we might expect a net increase in transmission of West Nile virus in response to

634 the warming climate, even as hot temperatures suppress transmission in some places. Still,  
635 warming is unlikely to eliminate any of these more temperate pathogens since the upper thermal  
636 limits for transmission are well above temperatures pathogens regularly experience in their  
637 current geographic ranges. More generally, our results raise concerns about the common practice  
638 of extrapolating monotonic relationships between temperature and disease incidence fit from  
639 observational data into warmer climate regimes to predict future cases [59,61].

640 While the data-driven models presented here represent the most comprehensive synthesis  
641 to date of trait thermal response data and their impact on transmission for these mosquito–  
642 pathogen systems with substantial transmission in temperate regions, additional temperature-  
643 dependent trait data would increase the accuracy and decrease the uncertainty in these models  
644 where data were sparse or missing. Our data synthesis and uncertainty analysis suggest  
645 prioritizing parasite development rate (*PDR*) and vector competence (*bc*) data and biting rate (*a*)  
646 data because those thermal responses varied widely among vector–virus pairs and determined the  
647 lower thermal limits and optima for transmission in many models. Additionally, vector  
648 competence and/or parasite development rate data were missing in many cases (WNV in *Cx.*  
649 *quinquefasciatus*, EEEV in *Cs. melanura*, RVFV in vectors from endemic areas, transmission  
650 efficiency [*b*] for SINV) or sparse (EEEV and WNV in *Cx. univittatus*), as were biting rate data  
651 (*Cx. univittatus*, RVFV vectors). Lifespan data—key for determining transmission optima and  
652 upper thermal limits—were the missing for *Ae. triseriatus*, *Cs. melanura*, *Cx. univittatus*, and  
653 RVFV vectors, and at temperatures below 14 °C for all vector species, so it was unclear which  
654 functional form these thermal responses should take (linear or quadratic). While the other  
655 mosquito demographic traits did not determine thermal limits for transmission in models here,  
656 fecundity (typically as *EFD*), larval-to-adult survival (*pLA*), and egg viability (*EV*) determined

657 thermal limits for malaria [2] and Ross River virus [6]. Thus, more fecundity data (missing for  
658 *Cx. tarsalis*, *Cx. univittatus*, and *Ae. triseriatus*; sparse for *Cx. pipiens* and *Cx. quinquefasciatus*)  
659 would also reduce model uncertainty. New data are particularly important for RVFV, which has  
660 a tropical distribution but for which the model depends on traits measured in *Cx. pipiens*  
661 collected from temperate regions and infection traits measured in *Ae. taeniorhynchus*, a North  
662 American species. RVFV is transmitted by a diverse community of vectors across the African  
663 continent, but experiments should prioritize hypothesized primary vectors (e.g., *Ae.*  
664 *circumluteolus* or *Ae. mcintoshi*) or secondary vectors that already have partial trait data (e.g.,  
665 *Ae. vexans* or *Cx. theileri*) [27,76]. Although temperature itself does not predict the occurrence of  
666 RVFV outbreaks, it may affect the size of epidemics once they are triggered by precipitation.  
667 Additionally, the thermal response of vector competence may vary across vector populations  
668 [77] and/or virus isolates even within the same species, so more data may also improve the  
669 accuracy of models without missing data.

670 As carbon emissions continue to increase and severe climate change becomes  
671 increasingly inevitable [78], it is critical that we understand how temperature will shape  
672 transmission of mosquito-borne diseases in a warmer future world. While data gaps are still  
673 limiting, the comparative approach is powerful for predicting similarities and differences across  
674 vectors and viruses, including differences between primarily tropical and temperate diseases [8].  
675 Accounting for the effects of temperature variation [38,41,79] is an important next step for using  
676 these models to accurately predict transmission. Additionally, the potential for evolution to  
677 warmer climates is uncertain because of limited knowledge on the level of genetic variation in  
678 thermal responses for most vectors or mosquito-borne pathogens within or between populations  
679 (but see [80,81]). Further, vectors and pathogens may experience different selective pressures, as

680 mosquito populations may depend on either increased fecundity or longevity at high  
681 temperatures, while pathogens require longer vector lifespans [8]. Thus, future trajectories of  
682 these diseases will depend not just on suitability of mean temperatures but also on temperature  
683 variation, thermal adaptation of vectors and viruses, land use (which governs mosquito–wildlife–  
684 human interactions), vector control activities, human and wildlife immune dynamics, and  
685 potential future emergence and spread of new vectors and viruses.

686

## 687 MATERIALS AND METHODS

688 All analyses were conducted using R 3.1.3 [82].

689

### 690 *Vector species range maps*

691 The distributions of *Cx. pipiens* and *Cx. quinquefasciatus* are georectified maps adapted  
692 from [35,83]. The northern boundary of *Cx. tarsalis* was taken from [84]. For the southern  
693 boundary, we drew a convex polygon using five datasets [85–89] in the Global Biodiversity  
694 Information Facility (<https://www.gbif.org/>).

695

### 696 *Temperature-dependent Trait Data*

697 We found 38 studies with appropriate temperature-dependent trait data from controlled  
698 laboratory experiments [5,56,80,81,90–124]. When necessary, we digitized the data using Web  
699 Plot Digitizer [125], a free online tool. When lifespan data were reported by sex, only female  
700 data were used. Vector competence trait data (*b*, *c*, or *bc*) were only included if time at sampling  
701 surpassed the estimated extrinsic incubation period (*EIP*, the inverse of *PDR*) at that  
702 temperature, which resulted in the exclusion of some studies [126,127].

703

#### 704 *Fitting Thermal Responses*

705         We fit trait thermal responses with a Bayesian approach using the ‘r2jags’ package [128],  
706 an R interface for the popular JAGS program [129] for the analysis of Bayesian graphical models  
707 using Gibbs sampling. It is a (near) clone of BUGS (Bayesian inference Using Gibbs Sampling)  
708 [130]. In JAGS, samples from a target distribution are obtained via Markov Chain Monte Carlo  
709 (MCMC). More specifically, JAGS uses a Metropolis-within-Gibbs approach, with an Adaptive  
710 Rejection Metropolis sampler used at each Gibbs step (for more information on MCMC  
711 algorithms see [131]).

712         For each thermal response being fit to trait data, we identified the most appropriate  
713 functional form (quadratic, Brière, or linear; eqs. 3–5) for that specific trait–species combination  
714 [8]. For traits with ambiguous functional responses, we fit the quadratic and Briere and used the  
715 deviance information criterion (DIC) [132] to pick the best fit. We assumed normal likelihood  
716 distributions with temperature-dependent mean values described by the appropriate function  
717 (eqs. 3–5) and a constant standard deviation described by an additional fitted parameter ( $\tau =$   
718  $1/\sigma^2$ ). The 95% credible intervals in Figs. 3-6 estimate the uncertainty in the mean thermal  
719 response; 95% prediction intervals that incorporate the estimated standard deviation in the data  
720 are shown in Figs S2-9.

721         We set all thermal response functions to zero when  $T < T_{min}$  and  $T > T_{max}$  (for eq. 3 and 4)  
722 or when  $T > -z/m$  (eq. 5) to prevent trait values from becoming negative. For traits that were  
723 proportions or probabilities, we also limited the thermal response functions at 1. For the linear  
724 thermal responses, we calculated the predicted thermal response in a similarly piecewise manner  
725 in order to be conservative: for temperatures at or above the coldest observed data point, we used

726 the trait values predicted by the fitted thermal response (i.e., the typical method); for  
727 temperatures below the coldest observed data point, we substituted the trait estimate at the  
728 coldest observed data point (i.e., forcing the thermal response to plateau, rather than continue  
729 increasing beyond the range of observed data).

730 For the fitting process, we ran three concurrent MCMC chains for 25000 iterations each,  
731 discarding the first 5000 iterations for burn-in (convergence was checked visually). We thinned  
732 the resultant chains, saving every eighth step. These settings resulted in 7500 samples in the full  
733 posterior distribution that we kept for further analysis.

734

### 735 *Generation of Priors*

736 We used data-informed priors to decrease the uncertainty in our estimated thermal  
737 responses and constrain the fitted thermal responses to be biologically plausible, particularly  
738 when data were sparse. These priors used our total dataset, which contained temperature-  
739 dependent trait data for all of the main species in the analysis (but with the focal species  
740 removed, see below), as well as from additional temperate *Aedes* and *Culex* species  
741 [92,94,102,106,111,112,133–138].

742 We fit each thermal response with a sequential two-step process, where both steps  
743 employed the same general fitting method (described above in *Fitting Thermal Responses*) but  
744 used different priors and data. In step 1, we generated high-information priors by fitting a  
745 thermal response to data from all species except the focal species of interest (i.e., a ‘leave-one-  
746 out’ approach). For example, for the prior for biting rate for *Cx. pipiens*, we used the biting rate  
747 data for all species except *Cx. pipiens*. For this step, we set general, low-information priors that  
748 represented minimal biological constraints on these functions (e.g., typically mosquitoes die if



749 temperatures exceed 45°C, so all biological processes are expected to cease;  $T_{min}$  must be less  
750 than  $T_{max}$ ). The bounds of these uniformly distributed priors were:  $0 < T_{min} < 24$ ,  $26 < T_{max} < 45$   
751 (quadratic) or  $28 < T_{max} < 45$  (Brière),  $0 < q < 1$ ,  $-10 < m < 10$ , and  $0 < b < 250$ . Then in step 2,  
752 we fit a thermal response to data from the focal species using the high-information priors from  
753 step 1.

754 Because we cannot directly pass posterior samples from JAGS as a prior, we modified  
755 the results from step 1 to use them in step 2. We used the ‘MASS’ package [139] to fit a gamma  
756 probability distribution to the posterior distributions for each thermal response parameter ( $T_{min}$ ,  
757  $T_{max}$ , and  $q$  [eq. 3 and 4]; or  $m$  and  $z$  [eq. 5]) obtained in step 1. The resulting gamma distribution  
758 parameters can be used directly to specify the priors in the JAGS model. Because the prior  
759 datasets were often very large, in many cases the priors were too strong and overdetermined the  
760 fit to the focal data. In a few other cases, we had philosophical reasons to strongly constrain the  
761 fit to the focal data even when they were sparse (e.g., to constrain  $T_{max}$  to very high temperatures  
762 so that other traits with more information determine the upper thermal limit for  $R_0$ ). Thus, we  
763 deflated or inflated the variance as needed (i.e., we fixed the gamma distribution mean but  
764 altered the variance by adjusting the parameters that describe the distribution accordingly). See  
765 S1 Text for more details and specific variance modifications for each thermal response.

766

### 767 *Constructing $R_0$ Models*

768 When data were missing for a vector–virus pair, we used two criteria to decide which  
769 thermal response to use as a substitute: 1) the ecological similarity (i.e., geographic range  
770 overlap) of species with available thermal responses, and 2) how restrictive the upper and lower  
771 bounds of the available thermal responses were. All else being equal, we chose the more

772 conservative (i.e., least restrictive) option so that  $R_0$  would be less likely to be determined by trait  
773 thermal responses that did not originate from the focal species. See S1 Text for more information  
774 about specific models.

775         When there was more than one option for how to parameterize a model (e.g., vector  
776 competence data for WEEV in *Cx. tarsalis* were available in two forms: separately as  $b$  and  $c$ ,  
777 and combined as  $bc$ ), we calculated  $R_0$  both ways. The results were very similar, except for the  
778 model for RVFV with lifespan data from *Cx. pipiens* lifespan in place of *Ae. taeniorhynchus* (Fig  
779 S21). See S1 Text for sensitivity and uncertainty methods and S1 Fig S11-20 for results.

780

#### 781 *Model validation: spatial analysis*

782         We obtained county-level neuroinvasive WNV disease data from 2001-2016 for the  
783 contiguous US ( $n = 3,109$ ) through the CDC's county-level disease monitoring program [140].  
784 Data were available as total human cases per year, which we adjusted to average cases per 1,000  
785 people (using 2010 US county-level census data) to account for population differences. We  
786 averaged cases across years beginning with the first year that had reported cases in a given  
787 county to account for the initial spread of WNV and the strong impact of immunity on  
788 interannual variation [5]. Ninety-eight percent of human cases of WNV in the US occur between  
789 June and October (data described below), and cases of mosquito-borne disease often lag behind  
790 temperature by 1–2 months [6,66]. Thus, we extracted monthly mean temperature data between  
791 the months of May–September for all years between 2001-2016 and averaged the data to  
792 estimate typical summer conditions for each county. Specifically, we took the centroid  
793 geographic coordinate for every county in the contiguous US with the 'rgeos' package [141] and

794 extracted corresponding historic climate data (Climate Research Unit 3.1 rasters) [142] from  
795  $0.5^{\circ 2}$  cells (approx. 2,500-3,000 km<sup>2</sup>) using the ‘raster’ package [143].

796 We fit a generalized additive model (GAM) for average incidence as a function of  
797 average summer temperature using the ‘mgcv’ package [144]. We used a gamma distribution  
798 with a log-link function to restrict incidence to positive values and capture heteroskedasticity in  
799 the data (i.e., higher variance with higher predicted means), adding a small, near-zero constant  
800 (0.0001) to all incidence values to allow the log-transformation for counties with zero incidence.  
801 GAMs use additive functions of smooth predictor effects to fit responses that are extremely  
802 flexible in the shape of the response. We restricted the number of knots to minimize overfitting  
803 ( $k = 5$ ; see Fig S24 for results across varying values of  $k$ ). For comparison, we also used the  
804 ‘loess’ function in base R ‘stats’ package [82] to fit locally estimated scatterplot smoothing  
805 (LOESS) regressions of the same data. LOESS regression is a simpler but similarly flexible  
806 method for estimating the central tendency of data. See Fig S25 for LOESS model results.

807

#### 808 *Model validation: seasonality analysis*

809 We calculated monthly temperature-dependent relative  $R_0$  to compare with month-of-  
810 onset data for neuro-invasive WNV, EEEV, and SLEV disease aggregated nationwide from  
811 2001-2016 [140,145,146], using the same monthly, county-level temperature data as above. For  
812 WNV, we used the subset of counties with reported cases (68% of counties). For SLEV and  
813 EEEV we used all counties from states with reported cases (16 and 20 states, respectively). We  
814 weighted each county  $R_0(T)$  by its population size to calculate a national estimate of  $R_0(T)$ . For  
815 WNV, the county-level estimates of  $R_0(T)$  used models for three *Culex* species (*Cx. pipiens*, *Cx.*  
816 *quinquefasciatus*, and *Cx. tarsalis*) weighted according to the proportion of WNV-positive

817 mosquitoes reported at the state level, reported in [5]. SLEV and EEEV both only had one  $R_0$   
818 model. The estimated monthly temperature-dependent relative  $R_0$  values and month-of-onset data  
819 were compared visually.

820

### 821 *Funding*

822 EAM, MSS, JC, LRJ, and MN were supported by the National Science Foundation (NSF,  
823 DEB-1518681; <https://nsf.gov/>). LRJ was supported by the NSF (DMS-1750113). AV and MN  
824 were supported by the Stanford Vice Provost for Undergraduate Education Summer Research  
825 Program in the Biology Department; MN was supported by the Introductory Seminars Program  
826 at Stanford University. HS was supported by a Luther and Alice Hamlett Undergraduate  
827 Research Scholarship at Virginia Tech. EAM was also supported by the National Institutes of  
828 Health (NIGMS R35 MIRA: 1R35GM133439-01), Stanford Woods Institute for the  
829 Environment (<https://woods.stanford.edu/research/environmental-venture-projects>), the Hellman  
830 Fellowship (<http://www.hellmanfellows.org/>), and the Terman Fellowship.

831

### 832 *Acknowledgements*

833 We gratefully acknowledge the students of the Spring 2017 Stanford University  
834 Introductory Seminar course BIO 2N: Global Change and the Ecology and Evolution of  
835 Infectious Diseases, who helped with preliminary literature searches, data collection, and model  
836 fitting: Uche Amakiri, Michelle Bach, Isabelle Carpenter, Phillip Cathers, Audriana Fitzmorris,  
837 Alex Fuentes, Margaux Giles, Gillian Gittler, Emma Leads Armstrong, Erika Malaspina, Elise  
838 Most, Stephen Moye, Jackson Rudolph, Simone Speizer, William Wang, and Ethan Wentworth.  
839 We thank the Stanford University Introductory Seminars program for support. We thank

840 Michelle Evans for creating Figure 2. We thank Marc Fischer, Nicole Lindsey, and Lyle  
841 Peterson at the CDC for providing the month-of-onset case data, and Sara Paull for providing  
842 state-level data for proportion of WNV vectors. We thank Nicholas Skaff for guidance with  
843 EEEV vector ecology.  
844  
845 *Competing interests:* The authors declare that they have no competing interests.

846 **REFERENCES**

847

- 848 1. Rogers DJ, Randolph SE. Climate Change and Vector-Borne Diseases. *Advances in*  
849 *Parasitology*. 2006;62: 345–381. doi:10.1016/S0065-308X(05)62010-6
- 850 2. Mordecai EA, Paaijmans KP, Johnson LR, Balzer C, Ben-Horin T, de Moor E, et al. Optimal  
851 temperature for malaria transmission is dramatically lower than previously predicted.  
852 *Ecology letters*. 2013;16: 22–30. doi:10.1111/ele.12015
- 853 3. Johnson LR, Ben-Horin T, Lafferty KD, McNally A, Mordecai E, Paaijmans KP, et al.  
854 Understanding uncertainty in temperature effects on vector-borne disease: A Bayesian  
855 approach. *Ecology*. 2015;96: 203–213. doi:10.1890/13-1964.1
- 856 4. Mordecai EA, Cohen JM, Evans MV, Gudapati P, Johnson LR, Lippi CA, et al. Detecting  
857 the impact of temperature on transmission of Zika, dengue, and chikungunya using  
858 mechanistic models. *PLoS Neglected Tropical Diseases*. 2017;11: e0005568.  
859 doi:10.1371/journal.pntd.0005568
- 860 5. Paull SH, Horton DE, Ashfaq M, Rastogi D, Kramer LD, Diffenbaugh NS, et al. Drought  
861 and immunity determine the intensity of West Nile virus epidemics and climate change  
862 impacts. *Proceedings of the Royal Society B: Biological Sciences*. 2017;284: 20162078.  
863 doi:10.1098/rspb.2016.2078
- 864 6. Shocket MS, Ryan SJ, Mordecai EA. Temperature explains broad patterns of Ross River  
865 virus transmission. *eLife*. 2018;7: e37762. doi:10.7554/eLife.37762
- 866 7. Tesla B, Demakovskiy LR, Mordecai EA, Ryan SJ, Bonds MH, Ngonghala CN, et al.  
867 Temperature drives Zika virus transmission: evidence from empirical and mathematical  
868 models. *Proceedings of the Royal Society B: Biological Sciences*. 2018;285: 20180795.  
869 doi:10.1098/rspb.2018.0795
- 870 8. Mordecai EA, Caldwell JM, Grossman MK, Lippi CA, Johnson LR, Neira M, et al. Thermal  
871 biology of mosquito-borne disease. *Ecology Letters*. 2019;22: 1690–1708.  
872 doi:10.1111/ele.13335
- 873 9. Martens WJM, Jetten TH, Focks DA. Sensitivity of malaria, schistosomiasis and dengue to  
874 global warming. *Climatic Change*. 1997;35: 145–156. doi:10.1023/A:1005365413932
- 875 10. Parham PE, Michael E. Modeling the effects of weather and climate change on malaria  
876 transmission. *Environmental Health Perspectives*. 2010;118: 620–626.  
877 doi:10.1289/ehp.0901256
- 878 11. Liu-Helmersson J, Stenlund H, Wilder-Smith A, Rocklöv J. Vectorial capacity of *Aedes*  
879 *aegypti*: Effects of temperature and implications for global dengue epidemic potential. *PLoS*  
880 *ONE*. 2014;9. doi:10.1371/journal.pone.0089783

- 881 12. Wesolowski A, Qureshi T, Boni MF, Sundsøy PR, Johansson MA, Rasheed SB, et al. Impact  
882 of human mobility on the emergence of dengue epidemics in Pakistan. *Proceedings of the*  
883 *National Academy of Sciences*. 2015;112: 11887–11892. doi:10.1073/pnas.1504964112
- 884 13. Siraj AS, Bouma MJ, Santos-Vega M, Yeshiwondim AK, Rothman DS, Yadeta D, et al.  
885 Temperature and population density determine reservoir regions of seasonal persistence in  
886 highland malaria. *Proceedings of the Royal Society B: Biological Sciences*. 2015;282:  
887 20151383. doi:10.1098/rspb.2015.1383
- 888 14. Werner AK, Goater S, Carver S, Robertson G, Allen GR, Weinstein P. Environmental  
889 drivers of Ross River virus in southeastern Tasmania, Australia: towards strengthening  
890 public health interventions. *Epidemiology and Infection*. 2012;140: 359–371.  
891 doi:10.1017/S0950268811000446
- 892 15. Lowe R, Stewart-Ibarra AM. Climate and Non-Climate Drivers of Dengue Epidemics in  
893 Southern Coastal Ecuador. *The American Journal of Tropical Medicine and Hygiene*.  
894 2013;88: 971–981. doi:10.4269/ajtmh.12-0478
- 895 16. Peña-García VH, Triana-Chávez O, Arboleda-Sánchez S. Estimating Effects of Temperature  
896 on Dengue Transmission in Colombian Cities. *Annals of Global Health*. 2017;83: 509.  
897 doi:10.1016/j.aogh.2017.10.011
- 898 17. Perkins TA, Metcalf CJE, Grenfell BT, Tatem AJ. Estimating Drivers of Autochthonous  
899 Transmission of Chikungunya Virus in its Invasion of the Americas. *PLoS Currents*. 2015;7.  
900 doi:10.1371/currents.outbreaks.a4c7b6ac10e0420b1788c9767946d1fc
- 901 18. Gatton ML, Kay BH, Ryan PA. Environmental predictors of Ross River virus disease  
902 outbreaks in Queensland, Australia. *Am J Trop Med Hyg*. 2005;72: 792–799. doi:72/6/792  
903 [pii]
- 904 19. Shah MM, Krystosik AR, Ndenga BA, Mutuku FM, Caldwell JM, Otuka V, et al. Malaria  
905 smear positivity among Kenyan children peaks at intermediate temperatures as predicted by  
906 ecological models. *Parasites & Vectors*. 2019;12: 288. doi:10.1186/s13071-019-3547-z
- 907 20. Lafferty KD. The ecology of climate change and infectious diseases. *Ecology*. 2009;90: 888–  
908 900. doi:10.1890/09-1656.1
- 909 21. Rohr JR, Dobson AP, Johnson PTJ, Kilpatrick AM, Paull SH, Raffel TR, et al. Frontiers in  
910 climate change-disease research. *Trends in Ecology & Evolution*. 2011;26: 270–277.  
911 doi:10.1016/j.tree.2011.03.002
- 912 22. Lafferty KD, Mordecai EA. The rise and fall of infectious disease in a warmer world.  
913 *F1000Research*. 2016;5: 2040. doi:10.12688/f1000research.8766.1
- 914 23. Ryan SJ, McNally A, Johnson LR, Mordecai EA, Ben-Horin T, Paaijmans KP, et al.  
915 Mapping physiological suitability limits for malaria in Africa under climate change. *Vector*  
916 *borne and zoonotic diseases*. 2015;15: 718–25. doi:10.1089/vbz.2015.1822

- 917 24. Kilpatrick AM. Globalization, Land Use, and the Invasion of West Nile Virus. *Science*.  
918 2011;334: 323–327. doi:10.1126/science.1201010
- 919 25. Weaver SC, Barrett ADT. Transmission cycles, host range, evolution and emergence of  
920 arboviral disease. *Nature Reviews Microbiology*. 2004;2: 789–801.  
921 doi:10.1038/nrmicro1006
- 922 26. Adouchief S, Smura T, Sane J, Vapalahti O, Kurkela S. Sindbis virus as a human pathogen-  
923 epidemiology, clinical picture and pathogenesis: Sindbis virus as a human pathogen.  
924 *Reviews in Medical Virology*. 2016;26: 221–241. doi:10.1002/rmv.1876
- 925 27. Linthicum KJ, Britch SC, Anyamba A. Rift Valley Fever: An Emerging Mosquito-Borne  
926 Disease. *Annual Review of Entomology*. 2016;61: 395–415. doi:10.1146/annurev-ento-  
927 010715-023819
- 928 28. Go YY, Balasuriya UBR, Lee C. Zoonotic encephalitides caused by arboviruses:  
929 transmission and epidemiology of alphaviruses and flaviviruses. *Clinical and Experimental*  
930 *Vaccine Research*. 2014;3: 58. doi:10.7774/cevr.2014.3.1.58
- 931 29. Centers for Disease Control and Prevention. St. Louis Encephalitis: Statistics and Maps.  
932 2018 Dec. Available: <https://www.cdc.gov/sle/technical/epi.html>
- 933 30. Centers for Disease Control and Prevention. Eastern Equine Encephalitis: Epidemiology &  
934 Geographic Distribution. 2018 Sep. Available:  
935 <https://www.cdc.gov/easternequineencephalitis/tech/epi.html>
- 936 31. Bates S. Rare eastern equine encephalitis has killed 9 people in the U.S. in 2019. *Science*  
937 *News*. 1 Oct 2019. Available: [https://www.sciencenews.org/article/rare-disease-eastern-  
938 equine-encephalitis-killed-nine-people-2019](https://www.sciencenews.org/article/rare-disease-eastern-equine-encephalitis-killed-nine-people-2019)
- 939 32. Sang R, Arum S, Chepkorir E, Mosomtai G, Tigoï C, Sigei F, et al. Distribution and  
940 abundance of key vectors of Rift Valley fever and other arboviruses in two ecologically  
941 distinct counties in Kenya. *Bird B*, editor. *PLoS Neglected Tropical Diseases*. 2017;11:  
942 e0005341. doi:10.1371/journal.pntd.0005341
- 943 33. Harley D, Sleigh A, Ritchie S. Ross River Virus Transmission, Infection, and Disease: a  
944 Cross-Disciplinary Review. *Clinical Microbiology Reviews*. 2001;14: 909–932.  
945 doi:10.1128/CMR.14.4.909
- 946 34. Gonçalves BP, Kapulu MC, Sawa P, Guelbéogo WM, Tiono AB, Grignard L, et al.  
947 Examining the human infectious reservoir for *Plasmodium falciparum* malaria in areas of  
948 differing transmission intensity. *Nature Communications*. 2017;8. doi:10.1038/s41467-017-  
949 01270-4
- 950 35. Farajollahi A, Fonseca DM, Kramer LD, Marm Kilpatrick A. “Bird biting” mosquitoes and  
951 human disease: A review of the role of *Culex pipiens* complex mosquitoes in epidemiology.  
952 *Infection, Genetics and Evolution*. 2011;11: 1577–1585. doi:10.1016/j.meegid.2011.08.013



- 953 36. Diekmann O, Heesterbeek JAP, Roberts MG. The construction of next-generation matrices  
954 for compartmental epidemic models. *Journal of the Royal Society Interface*. 2010;7: 873–  
955 885. doi:10.1098/rsif.2009.0386
- 956 37. Dietz K. The estimation of the basic reproduction number for infectious diseases. *Statistical*  
957 *Methods in Medical Research*. 1993;2: 23–41. doi:10.1177/096228029300200103
- 958 38. Paaijmans KP, Blanford S, Bell AS, Blanford JI, Read AF, Thomas MB. Influence of climate  
959 on malaria transmission depends on daily temperature variation. *Proceedings of the National*  
960 *Academy of Sciences of the United States of America*. 2010;107: 15135–9.  
961 doi:10.1073/pnas.1006422107
- 962 39. Murdock C, Evans M, McClanahan T, Miazgowicz K, Tesla B. Fine-scale variation in  
963 microclimate across and urban landscape changes the capacity of *Aedes albopictus* to vector  
964 arboviruses. *PLoS Neglected Tropical Diseases*. 2017;11: e0005640.  
965 doi:10.5061/dryad.s3953
- 966 40. Huber JH, Childs ML, Caldwell JM, Mordecai EA. Seasonal temperature variation  
967 influences climate suitability for dengue, chikungunya, and Zika transmission. Althouse B,  
968 editor. *PLoS Neglected Tropical Diseases*. 2018;12: e0006451.  
969 doi:10.1371/journal.pntd.0006451
- 970 41. Lambrechts L, Paaijmans KP, Fansiri T, Carrington LB, Kramer LD, Thomas MB, et al.  
971 Impact of daily temperature fluctuations on dengue virus transmission by *Aedes aegypti*.  
972 *Proceedings of the National Academy of Sciences*. 2011;108: 7460–7465.  
973 doi:10.1073/pnas.1101377108
- 974 42. Bacaër N. Approximation of the Basic Reproduction Number  $R_0$  for Vector-Borne Diseases  
975 with a Periodic Vector Population. *Bulletin of Mathematical Biology*. 2007;69: 1067–1091.  
976 doi:10.1007/s11538-006-9166-9
- 977 43. Bacaër N, Ait Dads EH. On the biological interpretation of a definition for the parameter  $R_0$   
978 in periodic population models. *Journal of Mathematical Biology*. 2012;65: 601–621.  
979 doi:10.1007/s00285-011-0479-4
- 980 44. Bacaër N, Guernaoui S. The epidemic threshold of vector-borne diseases with seasonality:  
981 The case of cutaneous leishmaniasis in Chichaoua, Morocco. *Journal of Mathematical*  
982 *Biology*. 2006;53: 421–436. doi:10.1007/s00285-006-0015-0
- 983 45. Briere J-F, Pracros P, Le Roux A-Y, Pierre J-S. A Novel Rate Model of Temperature-  
984 Dependent Development for Arthropods. *Environmental Entomology*. 1999;28: 22–29.  
985 doi:10.1093/ee/28.1.22
- 986 46. Amarasekare P, Savage V. A Framework for Elucidating the Temperature Dependence of  
987 Fitness. *The American Naturalist*. 2012;179: 178–191. doi:10.1086/663677
- 988 47. Vinogradova EB. *Culex pipiens pipiens* mosquitoes taxonomy, distribution, ecology,  
989 physiology, genetics, applied importance and control. Sofia: Pensoft; 2000.

- 990 48. Nelms BM, Macedo PA, Kothera L, Savage HM, Reisen WK. Overwintering biology of  
991 *Culex* (Diptera: Culicidae) mosquitoes in the Sacramento Valley of California. *J Med*  
992 *Entomol.* 2013;50: 773–790.
- 993 49. Diniz DFA, de Albuquerque CMR, Oliva LO, de Melo-Santos MAV, Ayres CFJ. Diapause  
994 and quiescence: dormancy mechanisms that contribute to the geographical expansion of  
995 mosquitoes and their evolutionary success. *Parasites & Vectors.* 2017;10.  
996 doi:10.1186/s13071-017-2235-0
- 997 50. Urbanski JM, Benoit JB, Michaud MR, Denlinger DL, Armbruster P. The molecular  
998 physiology of increased egg desiccation resistance during diapause in the invasive mosquito,  
999 *Aedes albopictus*. *Proceedings of the Royal Society B: Biological Sciences.* 2010;277: 2683–  
1000 2692. doi:10.1098/rspb.2010.0362
- 1001 51. Deutsch CA, Tewksbury JJ, Huey RB, Sheldon KS, Ghalambor CK, Haak DC, et al. Impacts  
1002 of climate warming on terrestrial ectotherms across latitude. *Proceedings of the National*  
1003 *Academy of Sciences.* 2008;105: 6668–6672. doi:10.1073/pnas.0709472105
- 1004 52. Sunday JM, Bates AE, Dulvy NK. Global analysis of thermal tolerance and latitude in  
1005 ectotherms. *Proceedings of the Royal Society B: Biological Sciences.* 2011;278: 1823–1830.  
1006 doi:10.1098/rspb.2010.1295
- 1007 53. Overgaard J, Kearney MR, Hoffmann AA. Sensitivity to thermal extremes in Australian  
1008 *Drosophila* implies similar impacts of climate change on the distribution of widespread and  
1009 tropical species. *Global Change Biology.* 2014;20: 1738–1750. doi:10.1111/gcb.12521
- 1010 54. Hay SI, Guerra CA, Tatem AJ, Noor AM, Snow RW. The global distribution and population  
1011 at risk of malaria: past, present, and future. *The Lancet Infectious Diseases.* 2004;4: 327–  
1012 336. doi:10.1016/S1473-3099(04)01043-6
- 1013 55. Brathwaite Dick O, San Martín JL, Montoya RH, del Diego J, Zambrano B, Dayan GH. The  
1014 History of Dengue Outbreaks in the Americas. *The American Journal of Tropical Medicine*  
1015 *and Hygiene.* 2012;87: 584–593. doi:10.4269/ajtmh.2012.11-0770
- 1016 56. Reisen WK, Fang Y, Martinez VM. Effects of Temperature on the Transmission of West  
1017 Nile Virus by *Culex tarsalis* (Diptera: Culicidae). *Journal of Medical Entomology.* 2006;43:  
1018 309–317. doi:10.1603/0022-2585(2006)043[0309:EOTOTT]2.0.CO;2
- 1019 57. Platonov AE, Fedorova MV, Karan LS, Shopenskaya TA, Platonova OV, Zhuravlev VI.  
1020 Epidemiology of West Nile infection in Volgograd, Russia, in relation to climate change and  
1021 mosquito (Diptera: Culicidae) bionomics. *Parasitology Research.* 2008;103: 45–53.  
1022 doi:10.1007/s00436-008-1050-0
- 1023 58. Hahn MB, Monaghan AJ, Hayden MH, Eisen RJ, Delorey MJ, Lindsey NP, et al.  
1024 Meteorological Conditions Associated with Increased Incidence of West Nile Virus Disease  
1025 in the United States, 2004–2012. *The American Journal of Tropical Medicine and Hygiene.*  
1026 2015;92: 1013–1022. doi:10.4269/ajtmh.14-0737

- 1027 59. Marcantonio M, Rizzoli A, Metz M, Rosà R, Marini G, Chadwick E, et al. Identifying the  
1028 Environmental Conditions Favouring West Nile Virus Outbreaks in Europe. Gourbiere S,  
1029 editor. PLoS ONE. 2015;10: e0121158. doi:10.1371/journal.pone.0121158
- 1030 60. Ahmadnejad F, Otarod V, Fathnia A, Ahmadabadi A, Fallah MH, Zavareh A, et al. Impact of  
1031 Climate and Environmental Factors on West Nile Virus Circulation in Iran. J Arthropod  
1032 Borne Dis. 2016;10: 315–327.
- 1033 61. Semenza JC, Tran A, Espinosa L, Sudre B, Domanovic D, Paz S. Climate change projections  
1034 of West Nile virus infections in Europe: implications for blood safety practices.  
1035 Environmental Health. 2016;15. doi:10.1186/s12940-016-0105-4
- 1036 62. Shand L, Brown WM, Chaves LF, Goldberg TL, Hamer GL, Haramis L, et al. Predicting  
1037 West Nile Virus Infection Risk From the Synergistic Effects of Rainfall and Temperature.  
1038 Journal of Medical Entomology. 2016;53: 935–944. doi:10.1093/jme/tjw042
- 1039 63. Brummer-Korvenkontio M, Vapalahti O, Kuusisto P, Saikku P, Manni T, Koskela P, et al.  
1040 Epidemiology of Sindbis virus infections in Finland 1981–96: possible factors explaining a  
1041 peculiar disease pattern. Epidemiology and Infection. 2002;129.  
1042 doi:10.1017/S0950268802007409
- 1043 64. Jalava K, Sane J, Ollgren J, Ruuhela R, Rätti O, Kurkela S, et al. Climatic, ecological and  
1044 socioeconomic factors as predictors of Sindbis virus infections in Finland. Epidemiology and  
1045 Infection. 2013;141: 1857–1866. doi:10.1017/S095026881200249X
- 1046 65. Mallya S, Sander B, Roy-Gagnon M-H, Taljaard M, Jolly A, Kulkarni MA. Factors  
1047 associated with human West Nile virus infection in Ontario: a generalized linear mixed  
1048 modelling approach. BMC Infectious Diseases. 2018;18. doi:10.1186/s12879-018-3052-6
- 1049 66. Stewart Ibarra AM, Ryan SJ, Beltrán E, Mejía R, Silva M, Muñoz Á. Dengue Vector  
1050 Dynamics (*Aedes aegypti*) Influenced by Climate and Social Factors in Ecuador:  
1051 Implications for Targeted Control. Mores CN, editor. PLoS ONE. 2013;8: e78263.  
1052 doi:10.1371/journal.pone.0078263
- 1053 67. Jacups SP, Whelan PI, Markey PG, Cleland SJ, Williamson GJ, Currie BJ. Predictive  
1054 indicators for Ross River virus infection in the Darwin area of tropical northern Australia,  
1055 using long-term mosquito trapping data. Tropical Medicine and International Health.  
1056 2008;13: 943–952. doi:10.1111/j.1365-3156.2008.02095.x
- 1057 68. Hu W, Tong S, Mengersen K, Oldenburg B. Rainfall, mosquito density and the transmission  
1058 of Ross River virus: A time-series forecasting model. Ecological Modelling. 2006;196: 505–  
1059 514. doi:10.1016/j.ecolmodel.2006.02.028
- 1060 69. Kilpatrick AM, Kramer LD, Jones MJ, Marra PP, Daszak P. West Nile Virus Epidemics in  
1061 North America Are Driven by Shifts in Mosquito Feeding Behavior. Ostfeld R, editor. PLoS  
1062 Biology. 2006;4: e82. doi:10.1371/journal.pbio.0040082

- 1063 70. Hess AD, Cherubin CE, Lamotte LC. Relation of Temperature to Activity of Western and St.  
1064 Louis Encephalitis Viruses \*. The American Journal of Tropical Medicine and Hygiene.  
1065 1963;12: 657–667. doi:10.4269/ajtmh.1963.12.657
- 1066 71. Anyamba A, Chretien J-P, Small J, Tucker CJ, Formenty PB, Richardson JH, et al.  
1067 Prediction of a Rift Valley fever outbreak. Proceedings of the National Academy of  
1068 Sciences. 2009;106: 955–959. doi:10.1073/pnas.0806490106
- 1069 72. Linthicum KJ, Anyamba A, Tucker CJ, Kelley PW, Myers MF, Peters CJ. Climate and  
1070 satellite indicators to forecast Rift Valley fever epidemics in Kenya. Science. 1999;285: 397–  
1071 400.
- 1072 73. Vogels CBF, Hartemink N, Koenraadt CJM. Modelling West Nile virus transmission risk in  
1073 Europe: effect of temperature and mosquito biotypes on the basic reproduction number.  
1074 Scientific Reports. 2017;7. doi:10.1038/s41598-017-05185-4
- 1075 74. Kushmaro A, Friedlander TA, Levins R. Temperature Effects on the Basic Reproductive  
1076 Number (R0) Of West Nile Virus, Based On Ecological Parameters: Endemic Vs. New  
1077 Emergence Regions. Journal of Tropical Diseases. 2015;s1. doi:10.4172/2329-891X.1000S1-  
1078 001
- 1079 75. Molnár PK, Kutz SJ, Hoar BM, Dobson AP. Metabolic approaches to understanding climate  
1080 change impacts on seasonal host-macroparasite dynamics. Ecology letters. 2013;16: 9–21.  
1081 doi:10.1111/ele.12022
- 1082 76. Braack L, Gouveia de Almeida AP, Cornel AJ, Swanepoel R, de Jager C. Mosquito-borne  
1083 arboviruses of African origin: review of key viruses and vectors. Parasites & Vectors.  
1084 2018;11. doi:10.1186/s13071-017-2559-9
- 1085 77. Kilpatrick AM, Ebel GD, Reddy MR, Fonseca DM, Kramer LD. Spatial and Temporal  
1086 Variation in Vector Competence of *Culex pipiens* and *Cx. restuans* Mosquitoes for West Nile  
1087 Virus. The American Journal of Tropical Medicine and Hygiene. 2010;83: 607–613.  
1088 doi:10.4269/ajtmh.2010.10-0005
- 1089 78. Intergovernmental Panel on Climate Change. Climate Change 2014: Synthesis Report.  
1090 Contribution of Working Groups I, II and III to the Fifth Assessment. Geneva, Switzerland:  
1091 IPCC; 2014 pp. 1–151.
- 1092 79. Bernhardt JR, Sunday JM, Thompson PL, O'Connor MI. Nonlinear averaging of thermal  
1093 experience predicts population growth rates in a thermally variable environment.  
1094 Proceedings of the Royal Society B: Biological Sciences. 2018;285: 20181076.  
1095 doi:10.1098/rspb.2018.1076
- 1096 80. Kilpatrick AM, Meola MA, Moudy RM, Kramer LD. Temperature, viral genetics, and the  
1097 transmission of West Nile virus by *Culex pipiens* mosquitoes. PLoS Pathogens. 2008;4.  
1098 doi:10.1371/journal.ppat.1000092

- 1099 81. Ruybal JE, Kramer LD, Kilpatrick AM. Geographic variation in the response of *Culex*  
1100 *pipiens* life history traits to temperature. *Parasites & Vectors*. 2016;9. doi:10.1186/s13071-  
1101 016-1402-z
- 1102 82. R Core Team. R: A language and for statistical computing. Vienna, Austria: R Foundation  
1103 for Statistical Computing; 2016.
- 1104 83. Smith JL, Fonseca DM. Rapid assays for identification of members of the *Culex* (*Culex*)  
1105 *pipiens* complex, their hybrids, and other sibling species (Diptera: culicidae). *Am J Trop*  
1106 *Med Hyg*. 2004;70: 339–345.
- 1107 84. Darsie Jr, Richard F, Ward, Ronald A. Identification and Geographical Distribution of the  
1108 Mosquitoes of North America, North of Mexico. University Press of Florida; 2016.
- 1109 85. Huerta Jiménez H. Actualización de la Colección de Artrópodos con importancia médica  
1110 (CAIM), Laboratorio de Entomología, InDRE. Comisión nacional para el conocimiento y  
1111 uso de la biodiversidad; 2018. doi:10.15468/y2rff2
- 1112 86. López Cárdenas J. Apoyo para la infraestructura de la colección de artrópodos con y sin  
1113 importancia médica del Laboratorio estatal de Salud Pública del estado de Guanajuato.  
1114 Comisión nacional para el conocimiento y uso de la biodiversidad; 2018.  
1115 doi:10.15468/5mjese
- 1116 87. Ortega Morales AI. Catálogo digital y clave ilustrada de los mosquitos (Diptera: Culicidae)  
1117 de las zonas áridas de los estados de Nuevo León y Tamaulipas, México. Comisión nacional  
1118 para el conocimiento y uso de la biodiversidad; 2018. doi:10.15468/otexwf
- 1119 88. Ponce García G. Computarización de la Colección de insectos y ácaros de importancia  
1120 médica de la Facultad de Ciencias Biológicas, Universidad Autónoma de Nuevo León.  
1121 Comisión nacional para el conocimiento y uso de la biodiversidad; 2018.  
1122 doi:10.15468/sma9a5
- 1123 89. Walter Reed Biosystematics Unit. Mosquito Occurrence Dataset. Smithsonian Institution;  
1124 2018. doi:10.15468/tw2y9b
- 1125 90. Andreadis SS, Dimotsiou OC, Savopoulou-Soultani M. Variation in adult longevity of *Culex*  
1126 *pipiens f. pipiens*, vector of the West Nile Virus. *Parasitology Research*. 2014;113: 4315–  
1127 4319. doi:10.1007/s00436-014-4152-x
- 1128 91. Brust RA. WEIGHT AND DEVELOPMENT TIME OF DIFFERENT STADIA OF  
1129 MOSQUITOES REARED AT VARIOUS CONSTANT TEMPERATURES. *The Canadian*  
1130 *Entomologist*. 1967;99: 986–993. doi:10.4039/Ent99986-9
- 1131 92. Buth JL, Brust RA, Ellis RA. Development time, oviposition activity and onset of diapause  
1132 in *Culex tarsalis*, *Culex restuans* and *Culiseta inornata* in southern Manitoba. *J Am Mosq*  
1133 *Control Assoc*. 1990;6: 55–63.

- 1134 93. Chamberlain RW, Sudia WD. The effects of temperature upon the extrinsic incubation of  
1135 eastern equine encephalitis in mosquitoes. *Am J Hyg.* 1955;62: 295–305.
- 1136 94. Ciota AT, Matacchiero AC, Kilpatrick AM, Kramer LD. The Effect of Temperature on Life  
1137 History Traits of *Culex* Mosquitoes. *Journal of Medical Entomology.* 2014;51: 55–62.  
1138 doi:10.1603/ME13003
- 1139 95. Cornel AJ, Jupp PG, Blackburn NK. Environmental Temperature on the Vector Competence  
1140 of *Culex univittatus* (Diptera: Culicidae) for West Nile Virus. *Journal of Medical*  
1141 *Entomology.* 1993;30: 449–456. doi:10.1093/jmedent/30.2.449
- 1142 96. Dodson BL, Kramer LD, Rasgon JL. Effects of larval rearing temperature on immature  
1143 development and West Nile virus vector competence of *Culex tarsalis*. *Parasites & Vectors.*  
1144 2012;5: 199. doi:10.1186/1756-3305-5-199
- 1145 97. Dohm DJ, O’Guinn ML, Turell MJ. Effect of environmental temperature on the ability of  
1146 *Culex pipiens* (Diptera: Culicidae) to transmit West Nile virus. *Journal of Medical*  
1147 *Entomology.* 2002;39: 221–225. doi:10.1603/0022-2585-39.1.221
- 1148 98. Kramer LD, Hardy JL, Presser SB. Effect of temperature of extrinsic incubation on the  
1149 vector competence of *Culex tarsalis* for western equine encephalomyelitis virus. *Am J Trop*  
1150 *Med Hyg.* 1983;32: 1130–1139.
- 1151 99. Li J, Zhu G, Zhou H, Tang J, Cao J. Effect of temperature on the development of *Culex*  
1152 *pipiens pallens*. *Chin J Vector Biol & Control.* 2017;28: 35–37.
- 1153 100. Loetti V, Schweigmann N, Burroni N. Development rates, larval survivorship and wing  
1154 length of *Culex pipiens* (Diptera: Culicidae) at constant temperatures. *Journal of Natural*  
1155 *History.* 2011;45: 2203–2213. doi:10.1080/00222933.2011.590946
- 1156 101. Lundström JO, Turell MJ, Niklasson B. Effect of environmental temperature on the  
1157 vector competence of *Culex pipiens* and *Cx. torrentium* for Ockelbo virus. *Am J Trop Med*  
1158 *Hyg.* 1990;43: 534–542.
- 1159 102. Madder DJ, Surgeoner GA, Helson BV. Number of generations, egg production, and  
1160 developmental time of *Culex pipiens* and *Culex restauns* (Diptera: Culicidae) in southern  
1161 Ontario. *J Med Entomol.* 1983;20: 275–287.
- 1162 103. Mahmood F, Crans WJ. A thermal heat summation model to predict the duration of the  
1163 gonotrophic cycle of *Culiseta melanura* in nature. *J Am Mosq Control Assoc.* 1997;13: 92–  
1164 94.
- 1165 104. Mahmood F, Crans WJ. Effect of temperature on the development of *Culiseta melanura*  
1166 (Diptera: Culicidae) and its impact on the amplification of eastern equine encephalomyelitis  
1167 virus in birds. *J Med Entomol.* 1998;35: 1007–1012.



- 1168 105. McHaffey DG. Photoperiod and temperature influences on diapause in eggs of the  
1169 floodwater mosquito *Aedes vexans* (Meigen) (Diptera: Culicidae). *J Med Entomol.* 1972;9:  
1170 564–571.
- 1171 106. Mogi M. Temperature and Photoperiod Effects on Larval and Ovarian Development of  
1172 New Zealand Strains of *Culex quinquefasciatus* (Diptera: Culicidae). *Annals of the*  
1173 *Entomological Society of America.* 1992;85: 58–66. doi:10.1093/aesa/85.1.58
- 1174 107. Mpho M, Holloway GJ, Callaghan A. A comparison of the effects of organophosphate  
1175 insecticide exposure and temperature stress on fluctuating asymmetry and life history traits  
1176 in *Culex quinquefasciatus*. *Chemosphere.* 2001;45: 713–720.
- 1177 108. Mpho M, Callaghan A, Holloway GJ. Temperature and genotypic effects on life history  
1178 and fluctuating asymmetry in a field strain of *Culex pipiens*. *Heredity.* 2002;88: 307–312.  
1179 doi:10.1038/sj.hdy.6800045
- 1180 109. Mpho M, Callaghan A, Holloway GJ. Effects of temperature and genetic stress on life  
1181 history and fluctuating wing asymmetry in *Culex pipiens* mosquitoes. *European Journal of*  
1182 *Entomology.* 2002;99: 405–412. doi:10.14411/eje.2002.050
- 1183 110. Nayar JK. Effects of constant and fluctuating temperatures on life span of *Aedes*  
1184 *taeniorhynchus* adults. *Journal of Insect Physiology.* 1972;18: 1303–1313.  
1185 doi:10.1016/0022-1910(72)90259-4
- 1186 111. Oda T, Mori A, Ueda M, Kurokawa K, others. Effects of temperatures on the oviposition  
1187 and hatching of eggs in *Culex pipiens molestus* and *Culex pipiens quinquefasciatus*. *Tropical*  
1188 *Medicine.* 1980;22: 167–180.
- 1189 112. Oda T, Uchida K, Mori A, Mine M, Eshita Y, Kurokawa K, et al. Effects of high  
1190 temperature on the emergence and survival of adult *Culex pipiens molestus* and *Culex*  
1191 *quinquefasciatus* in Japan. *J Am Mosq Control Assoc.* 1999;15: 153–156.
- 1192 113. Rayah EAE, Groun NAA. Effect of temperature on hatching eggs and embryonic survival  
1193 in the mosquito *Culex quinquefasciatus*. *Entomologia Experimentalis et Applicata.* 1983;33:  
1194 349–351. doi:10.1111/j.1570-7458.1983.tb03281.x
- 1195 114. Reisen WK, Milby MM, Presser SB, Hardy JL. Ecology of Mosquitoes and St. Louis  
1196 Encephalitis Virus in the Los Angeles Basin of California, 1987–1990. *Journal of Medical*  
1197 *Entomology.* 1992;29: 582–598. doi:10.1093/jmedent/29.4.582
- 1198 115. Reisen WK, Meyer RP, Presser SB, Hardy JL. Effect of temperature on the transmission  
1199 of western equine encephalomyelitis and St. Louis encephalitis viruses by *Culex tarsalis*  
1200 (Diptera: Culicidae). *J Med Entomol.* 1993;30: 151–160.
- 1201 116. Reisen WK. Effect of temperature on *Culex tarsalis* (Diptera: Culicidae) from the  
1202 Coachella and San Joaquin Valleys of California. *J Med Entomol.* 1995;32: 636–645.

- 1203 117. Rueda LM, Patel KJ, Axtell RC, Stinner RE. Temperature-dependent development and  
1204 survival rates of *Culex quinquefasciatus* and *Aedes aegypti* (Diptera: Culicidae). J Med  
1205 Entomol. 1990;27: 892–898.
- 1206 118. Shelton RM. The effect of temperatures on development of eight mosquito species.  
1207 Mosquito News. 1973;33: 1–12.
- 1208 119. Tekle A. The Physiology of Hibernation and Its Role in the Geographical Distribution of  
1209 Populations of the *Culex Pipiens* Complex. The American Journal of Tropical Medicine and  
1210 Hygiene. 1960;9: 321–330. doi:10.4269/ajtmh.1960.9.321
- 1211 120. Teng H-J, Apperson CS. Development and Survival of Immature *Aedes albopictus* and  
1212 *Aedes triseriatus* (Diptera: Culicidae) in the Laboratory: Effects of Density, Food, and  
1213 Competition on Response to Temperature. Journal of Medical Entomology. 2000;37: 40–52.  
1214 doi:10.1603/0022-2585-37.1.40
- 1215 121. Trpiš M, Shemanchuk JA. EFFECT OF CONSTANT TEMPERATURE ON THE  
1216 LARVAL DEVELOPMENT OF *AEDES VEXANS* (DIPTERA: CULICIDAE). The  
1217 Canadian Entomologist. 1970;102: 1048–1051. doi:10.4039/Ent1021048-8
- 1218 122. Turell MJ, Rossi CA, Bailey CL. Effect of Extrinsic Incubation Temperature on the  
1219 Ability of *Aedes Taeniorhynchus* and *Culex Pipiens* to Transmit Rift Valley Fever Virus.  
1220 The American Journal of Tropical Medicine and Hygiene. 1985;34: 1211–1218.  
1221 doi:10.4269/ajtmh.1985.34.1211
- 1222 123. Turell MJ, Lundström JO. Effect of environmental temperature on the vector competence  
1223 of *Aedes aegypti* and *Ae. taeniorhynchus* for Ockelbo virus. Am J Trop Med Hyg. 1990;43:  
1224 543–550.
- 1225 124. van der Linde TC de K, Hewitt PH, Nel A, van der Westhuizen MC. Development rates  
1226 and percentage hatching of *Culex* (*Culex*) *theileri*; Theobald (Diptera: Culicidae) eggs at  
1227 various constant temperatures. Journal of the Entomological Society of Southern Africa.,  
1228 1990;53: 17–26.
- 1229 125. Rohatgi A. WebPlotDigitizer. 2018. Available: <https://automeris.io/WebPlotDigitizer>
- 1230 126. Vogels CBF, Fros JJ, Göertz GP, Pijlman GP, Koenraadt CJM. Vector competence of  
1231 northern European *Culex pipiens* biotypes and hybrids for West Nile virus is differentially  
1232 affected by temperature. Parasites & Vectors. 2016;9. doi:10.1186/s13071-016-1677-0
- 1233 127. Fros JJ, Geertsema C, Vogels CB, Roosjen PP, Failloux A-B, Vlak JM, et al. West Nile  
1234 Virus: High Transmission Rate in North-Western European Mosquitoes Indicates Its  
1235 Epidemic Potential and Warrants Increased Surveillance. Liang S, editor. PLoS Neglected  
1236 Tropical Diseases. 2015;9: e0003956. doi:10.1371/journal.pntd.0003956
- 1237 128. Su Y-S, Yajima M. R2jags: A Package for Running jags from R. 2009.



- 1238 129. Plummer M. JAGS: A program for analysis of Bayesian graphical models using Gibbs  
1239 sampling. Proceedings of the 3rd International Workshop on Distributed Statistical  
1240 Computing. 2003; 1–10. doi:ISSN 1609-395X
- 1241 130. Spiegelhalter D, Thomas A, Best N, Lunn D. WinBUGS user manual. 2003.
- 1242 131. Gilks WR, Richardson S, Spiegelhalter DJ, editors. Markov chain Monte Carlo in  
1243 practice. Boca Raton, Fla: Chapman & Hall; 1998.
- 1244 132. Spiegelhalter DJ, Best NG, Carlin BP, van der Linde A. Bayesian measures of model  
1245 complexity and fit. Journal of the Royal Statistical Society: Series B (Statistical  
1246 Methodology). 2002;64: 583–639. doi:10.1111/1467-9868.00353
- 1247 133. Kiarie-Makara MW, Ngumbi PM, Lee D-K. Effects of Temperature on the Growth and  
1248 Development of *Culex pipiens* Complex Mosquitoes (Diptera: Culicidae). Journal of  
1249 Pharmacy and Biological Sciences. 2015;10: 1–10.
- 1250 134. McHaffey DG, Harwood RF. Photoperiod and Temperature Influences on Diapause in  
1251 Eggs of the Floodwater Mosquito, *Aedes Dorsalis* (Meigen) (Diptera: Culicidae)1. Journal of  
1252 Medical Entomology. 1970;7: 631–644. doi:10.1093/jmedent/7.6.631
- 1253 135. McHaffey DG. Photoperiod and temperature influences on diapause in eggs of the  
1254 floodwater mosquito *Aedes nigromaculis* (Ludlow) (Diptera : Culicidae). Mosquito News.  
1255 1972;32: 51–61.
- 1256 136. Muturi EJ, Lampman R, Costanzo K, Alto BW. Effect of Temperature and Insecticide  
1257 Stress on Life-History Traits of *Culex restuans* and *Aedes albopictus* (Diptera: Culicidae).  
1258 Journal of Medical Entomology. 2011;48: 243–250. doi:10.1603/ME10017
- 1259 137. Olejníček J, Gelbic I. Differences in response to temperature and density between two  
1260 strains of the mosquito, *Culex pipiens molestus* forskal. J Vector Ecol. 2000;25: 136–145.
- 1261 138. Parker BM. Temperature and Salinity as Factors Influencing the Size and Reproductive  
1262 Potentials of *Aedes dorsalis* (Diptera: Culicidae). Annals of the Entomological Society of  
1263 America. 1982;75: 99–102. doi:10.1093/aesa/75.1.99
- 1264 139. Venables WN, Ripley BD. Modern applied statistics with S. 4th ed. New York: Springer;  
1265 2002.
- 1266 140. Centers for Disease Control and Prevention. West Nile Virus: Final Cumulative Maps &  
1267 Data for 1999-2017. 2018 Dec. Available:  
1268 <https://www.cdc.gov/westnile/statsmaps/cumMapsData.html>
- 1269 141. Bivand R, Rundel C. rgeos: Interface to Geometry Engine - Open Source (GEOS) R  
1270 Package version 0.4-1.
- 1271 142. Harris I, Jones PD, Osborn TJ, Lister DH. Updated high-resolution grids of monthly  
1272 climatic observations - the CRU TS3.10 Dataset: UPDATED HIGH-RESOLUTION GRIDS

- 1273 OF MONTHLY CLIMATIC OBSERVATIONS. *International Journal of Climatology*.  
1274 2014;34: 623–642. doi:10.1002/joc.3711
- 1275 143. Hijmans RJ. raster: Geographic data analysis and modeling, R package version 2.2.31.
- 1276 144. Wood SN. *Generalized additive models: an introduction with R*. Boca Raton, FL:  
1277 Chapman & Hall/CRC; 2006.
- 1278 145. Curren EJ, Lindsey NP, Fischer M, Hills SL. St. Louis Encephalitis Virus Disease in the  
1279 United States, 2003–2017. *The American Journal of Tropical Medicine and Hygiene*.  
1280 2018;99: 1074–1079. doi:10.4269/ajtmh.18-0420
- 1281 146. Lindsey NP, Staples JE, Fischer M. Eastern Equine Encephalitis Virus in the United  
1282 States, 2003–2016. *The American Journal of Tropical Medicine and Hygiene*. 2018;98:  
1283 1472–1477. doi:10.4269/ajtmh.17-0927
- 1284 147. Petersen LR, Brault AC, Nasci RS. West Nile Virus: Review of the Literature. *JAMA*.  
1285 2013;310: 308. doi:10.1001/jama.2013.8042
- 1286 148. Ronca SE, Murray KO, Nolan MS. Cumulative Incidence of West Nile Virus Infection,  
1287 Continental United States, 1999–2016. *Emerging Infectious Diseases*. 2019;25: 325–327.  
1288 doi:10.3201/eid2502.180765
- 1289 149. Government of Canada. Surveillance of West Nile virus. Government of Canada; 2018  
1290 Dec. Available: [https://www.canada.ca/en/public-health/services/diseases/west-nile-](https://www.canada.ca/en/public-health/services/diseases/west-nile-virus/surveillance-west-nile-virus.html)  
1291 [virus/surveillance-west-nile-virus.html](https://www.canada.ca/en/public-health/services/diseases/west-nile-virus/surveillance-west-nile-virus.html)
- 1292 150. European Centre for Disease Prevention and Control. Surveillance and disease data for  
1293 West Nile fever. European Centre for Disease Prevention and Control; 2018 Dec. Available:  
1294 <https://ecdc.europa.eu/en/west-nile-fever/surveillance-and-disease-data>
- 1295 151. World Health Organization. Rift Valley Fever Fact Sheet. World Health Organization;  
1296 2018 Feb. Available: <https://www.who.int/en/news-room/fact-sheets/detail/rift-valley-fever>
- 1297

## SUPPLEMENTAL MATERIAL for

### Shocket et al. ‘Transmission of West Nile virus and other temperate mosquito-borne viruses peaks at intermediate environmental temperatures’

#### List of Contents

|                                                                                                                                                                                                            |    |
|------------------------------------------------------------------------------------------------------------------------------------------------------------------------------------------------------------|----|
| 1. Model, thermal response, and trait data information:                                                                                                                                                    |    |
| a. $R_0$ model specifications                                                                                                                                                                              | 2  |
| b. Table S1: Trait thermal responses used in transmission ( $R_0$ ) models                                                                                                                                 | 5  |
| c. Table S2-S6: Trait thermal response functions, data sources, and posterior estimates                                                                                                                    | 6  |
| d. Table S7-S9: Priors for trait thermal response functions                                                                                                                                                | 10 |
| 2. Supplemental methods:                                                                                                                                                                                   |    |
| a. Priors for trait thermal responses                                                                                                                                                                      | 13 |
| b. Sensitivity and uncertainty analyses                                                                                                                                                                    | 14 |
| 3. Supplemental figures and validation table:                                                                                                                                                              |    |
| a. Fig S1: Mosquito trait thermal responses for additional vector species: <i>Aedes taeniorhynchus</i> , <i>Ae. triseriatus</i> , <i>Aedes vexans</i> , <i>Culex theileri</i> and <i>Culiseta melanura</i> | 15 |
| b. Fig S2-9: Thermal responses for traits with individual data points                                                                                                                                      | 16 |
| c. Fig S10: Medians & 95% credible intervals for thermal limits and optima of $R_0$ models                                                                                                                 | 24 |
| d. Fig S11-20: Sensitivity and uncertainty analyses for $R_0$ models                                                                                                                                       | 25 |
| e. Fig S21: Histograms of $T_{min}$ , optimum, and $T_{max}$ for $R_0$ models                                                                                                                              | 35 |
| f. Fig S22: Comparisons of alternative model parameterizations                                                                                                                                             | 36 |
| g. Fig S23: Comparison with previous transmission models for WNV                                                                                                                                           | 37 |
| h. Fig S24: GAM models fit with varying knot parameters                                                                                                                                                    | 38 |
| i. Table S10: GAM models fit with varying knot parameters                                                                                                                                                  | 39 |
| j. Fig S25: LOESS models plotted with binned WNV incidence                                                                                                                                                 | 40 |
| k. Fig S26: Raw county-level WNV incidence data                                                                                                                                                            | 41 |
| 4. References                                                                                                                                                                                              | 42 |

## **$R_0$ Model Specifications**

The equation for  $R_0$  (eq. 2 in main text) as a function of temperature ( $T$ ) that was used in previous analyses [1–6] has fecundity measured as eggs per female per day ( $EFD$ ):

$$\text{Full } R_0: R_0(T) = \left( \frac{a(T)^2 bc(T) e^{-\frac{\mu(T)}{PDR(T)}} EFD(T) EV(T) pLA(T) MDR(T)}{N r \mu(T)^3} \right)^{1/2} \quad \text{eq. 2}$$

Fecundity data were not available directly as eggs per female per day, so we had to transform the available data to obtain the quantities needed for these models. The data for *Cx. pipiens* were reported as eggs per female per gonotrophic cycle ( $EFGC$ ). To obtain  $EFD$ , we needed to divide  $EFGC$  by the length of the gonotrophic cycle. In general, the gonotrophic cycle is assumed to be approximately the inverse of the biting rate. In fact, our ‘biting rate’ ( $a$ ) data were observations of gonotrophic cycle duration. Accordingly,  $EFD = EFGC * a$ , resulting in the following equation for  $R_0$ :

$$R_0(T) = \left( \frac{a(T)^3 bc(T) e^{-\frac{\mu(T)}{PDR(T)}} EFGC(T) EV(T) pLA(T) MDR(T)}{N r \mu(T)^3} \right)^{1/2} \quad \text{eq. S1}$$

All but two of the vector–virus parameterizations used this form (eq. S1) of the  $R_0$  model (see Table S1, exceptions described below).

The fecundity data for *Cx. quinquefasciatus* were reported as eggs per raft ( $ER$ ). Females lay rafts once per gonotrophic cycle. Thus, in order to obtain an approximation to  $EFD$  (eggs per female per day), we again divide by the number of days per gonotrophic cycle and, further, we multiply by the proportion of females ovipositing ( $pO$ ), since not every female lays an egg raft.

These changes result in the following equation for  $R_0$ :

$$R_0(T) = \left( \frac{a(T)^3 bc(T) e^{-\frac{\mu(T)}{PDR(T)}} ER(T) pO(T) EV(T) pLA(T) MDR(T)}{N r \mu(T)^3} \right)^{1/2} \quad \text{eq. S2}$$

The *Cx. quinquefasciatus*–WNV model used eq. S2.

The *Ae. triseriatus*–EEEV also used eq. S2 (i.e., included  $pO$ ) but substituted the *Cx. pipiens* thermal response for *EFGC* in place of the *Cx. quinquefasciatus* thermal response for *ER* for the following reasons. There were no fecundity trait data available for *Ae. triseriatus*. (*Ae. triseriatus* was chosen as the focal species for the EEEV model because it is the only species with temperature-dependent vector competence data available, and it is a possible bridge vector for EEEV transmission to humans). *Cs. melanura* is the primary vector for maintaining enzootic cycles of EEEV in birds [7], more often cited in the literature in association with EEEV (e.g., [8]), and had data for  $pO$  (proportion ovipositing) available. Thus, we chose to include this thermal response in model because it contained information that could affect the upper and lower bounds of transmission (even though most models did not include  $pO$  [proportion ovipositing], because they use the *Cx. pipiens* EFGC [eggs per female per gonotrophic cycle] thermal response that includes  $pO$  implicitly). Then we needed to choose which egg production metric to include. We chose the *Cx. pipiens* EFGC thermal response over the *Cx. quinquefasciatus* ER thermal response because the former was the better choice according to both criteria: *Cx. pipiens* has a more similar species range to *Ae. triseriatus* and *Cs. melanura* and its thermal response was slightly more conservative (less restrictive = cooler lower thermal limit and warmer upper thermal limit). Although technically the units are not correct (see above), the thermal responses for *Cx. pipiens* EFGC and *Cx. quinquefasciatus* ER are so similar despite having different units (Fig 4B), we decided that the other two criteria were more important than being strict with regard to the units, as it is feasible to have an ER thermal response that is quite similar to the EFGC thermal response. Ultimately, because the thermal responses for EFGC and ER are so similar,

this decision only has a small impact on the  $R_0$  results (see Fig S21A comparing four alternative model specifications / parameterizations for the *Ae. triseriatus*-EEEV model).

In eqs. 2, S1, and S2, the remaining parameters that depend on temperature ( $T$ ) are: adult mosquito mortality ( $\mu$ , the inverse of lifespan [ $lf$ ]), pathogen development rate ( $PDR$ , the inverse of the extrinsic incubation period: the time required for exposed mosquitoes to become infectious), egg viability (proportion of eggs hatching into larvae,  $EV$ ), proportion of larvae surviving to adulthood ( $pLA$ ), and mosquito development rate ( $MDR$ , the inverse of the development period), and vector competence ( $bc$ , the proportion of exposed mosquitoes that become infectious). Vector competence is the product of infection efficiency ( $c$ , the proportion of exposed mosquitoes that develop a disseminated infection) and transmission efficiency ( $b$ , the proportion of infected mosquitoes that become infectious, with virus present in saliva). The form of vector competence varied between models based on the availability of data:  $bc(T)$  [reported a single parameter],  $c(T)*b(T)$  [both parameters reported separately],  $c(T)$  only, or  $b(T)$  only (see Table S1). The two remaining parameters do not depend on temperature: human density ( $N$ ) and the rate at which infected hosts recover and become immune ( $r$ ).

**Table S1: Trait thermal responses used in transmission ( $R_0$ ) models.** Viruses: West Nile (WNV), Eastern and Western Equine Encephalitis (EEEV and WEEV), St. Louis Encephalitis (SLEV), Sindbis (SINV), and Rift Valley Fever (RVFV). *Ae. vex.* = *Ae. vexans*, *Cs. mel.* = *Culiseta melanura*; all other vectors (*Cx.* = *Culex*) listed under model names. Traits are: fecundity (as eggs/female/gonotrophic cycle [EFGC] or eggs per raft\*proportion ovipositing [ER\*pO]), egg viability (EV), larval-to-adult survival (pLA), mosquito development rate (MDR), lifespan (lf), biting rate (a), vector competence (bc, b\*c, b, or c, as available), and parasite development rate (PDR). The WNV–*Cx. quinquefasciatus* model uses eq. S2 (ER\*pO); the EEEV–*Ae. triseriatus* model uses EFGC from *Cx. pipiens* and pO from *Cs. melanura*; all other models use eq. S1 (EFGC). When data were missing for a vector–virus pair, we substituted the most conservative (i.e., least restrictive of transmission) trait thermal response from a vector that occurs within the geographic range of disease transmission. Several models had multiple potentially valid choices for traits; we explain and show compare these alternative models with the main text versions in Fig S21. Checkmarks indicate a thermal response from the vector in the model name. The parasite development rate data for SINV was insensitive to temperature (Fig 4), so the trait thermal response was omitted from the SINV models (‘NA’).

| Model: virus–vector              | EFGC or ER*pO                        | EV              | pLA             | MDR             | lf              | a               | bc, c*b<br>c, or b       | PDR |
|----------------------------------|--------------------------------------|-----------------|-----------------|-----------------|-----------------|-----------------|--------------------------|-----|
| WNV– <i>Cx. pipiens</i>          | ✓                                    | ✓               | ✓               | ✓               | ✓               | ✓               | ✓ (bc)                   | ✓   |
| WNV– <i>Cx. quinquefasciatus</i> | ✓                                    | ✓               | ✓               | ✓               | ✓               | ✓               | <i>Cx. uni.</i><br>(c*b) | ✓   |
| WNV– <i>Cx. tarsalis</i>         | <i>Cx. pip.</i>                      | <i>Cx. pip.</i> | ✓               | ✓               | ✓               | ✓               | ✓ (b)                    | ✓   |
| WNV– <i>Cx. univittatus</i>      | <i>Cx. pip.</i>                      | <i>Cx. pip.</i> | <i>Cx. pip.</i> | <i>Cx. pip.</i> | <i>Cx. pip.</i> | <i>Cx. pip.</i> | ✓ (bc)                   | ✓   |
| WEEV– <i>Cx. tarsalis</i>        | <i>Cx. pip.</i>                      | <i>Cx. pip.</i> | ✓               | ✓               | ✓               | ✓               | ✓ (c*b)                  | ✓   |
| SLEV– <i>Cx. tarsalis</i>        | <i>Cx. pip.</i>                      | <i>Cx. pip.</i> | ✓               | ✓               | ✓               | ✓               | ✓ (c*b)                  | ✓   |
| EEEV– <i>Ae. triseriatus</i>     | <i>Cx. pip.</i> ,<br><i>Cs. mel.</i> | <i>Cx. pip.</i> | ✓               | ✓               | <i>Cx. pip.</i> | <i>Cs. mel.</i> | ✓ (bc)                   | ✓   |
| SINV– <i>Cx. pipiens</i>         | ✓                                    | ✓               | ✓               | ✓               | ✓               | ✓               | ✓ (c)                    | NA  |
| SINV– <i>Ae. taeniorhynchus</i>  | <i>Cx. pip.</i>                      | <i>Ae. vex.</i> | <i>Ae. vex.</i> | <i>Ae. vex.</i> | ✓               | <i>Cx. pip.</i> | ✓ (c)                    | NA  |
| RVFV– <i>Ae. taeniorhynchus</i>  | <i>Cx. pip.</i>                      | <i>Cx. the.</i> | <i>Ae. vex.</i> | <i>Ae. vex.</i> | ✓               | <i>Cx. pip.</i> | ✓ (bc)                   | ✓   |

**Table S2: Trait thermal response functions, data sources, and posterior estimates: biting rate and fecundity traits.** Asymmetrical responses fit with Brière function (**B**):  $B(T) = qT(T - T_{min})(T_{max} - T)^{1/2}$ ; symmetrical responses fit with quadratic function (**Q**):  $Q(T) = -q(T - T_{min})(T - T_{max})$ . Median function coefficients and optima (with 95% credible intervals).

| <b>Trait / Species</b><br><b>[data source]</b> | <b>F(x)</b> | <b>q (CIs)</b>                                         | <b>T<sub>min</sub> (CIs)</b> | <b>T<sub>max</sub> (CIs)</b> | <b>T<sub>opt</sub> (CIs)</b> |
|------------------------------------------------|-------------|--------------------------------------------------------|------------------------------|------------------------------|------------------------------|
| <b>Biting rate (a)</b>                         |             |                                                        |                              |                              |                              |
| <i>Cx. pipiens</i><br>[9–12]                   | B           | 1.70·10 <sup>-4</sup><br>(1.18–2.29·10 <sup>-4</sup> ) | 9.4<br>(2.8–13.4)            | 39.6<br>(37.9–40.6)          | 32.7<br>(31.3–33.6)          |
| <i>Cx. quinquefasciatus</i><br>[9,13]          | B           | 7.28·10 <sup>-5</sup><br>(5.31–11.8·10 <sup>-5</sup> ) | 3.1<br>(0.1–10.9)            | 39.3<br>(38.0–40.8)          | 31.9<br>(30.6–33.3)          |
| <i>Cx. tarsalis</i><br>[13]                    | B           | 1.67·10 <sup>-4</sup><br>(0.87–2.56·10 <sup>-4</sup> ) | 2.3<br>(0.1–9.4)             | 32.0<br>(30.6–41.7)          | 25.9<br>(24.8–33.9)          |
| <i>Cs. melanura</i><br>[14]                    | B           | 1.87·10 <sup>-4</sup><br>(1.49–2.31·10 <sup>-4</sup> ) | 7.8<br>(5.5–11.4)            | 31.8<br>(31.0–33.4)          | 26.4<br>(25.7–27.9)          |
| <b>Fecundity</b>                               |             |                                                        |                              |                              |                              |
| <i>Cx. pipiens</i> (EFGC)<br>[12]              | Q           | 5.98·10 <sup>-1</sup><br>(4.31–7.91·10 <sup>-1</sup> ) | 5.3<br>(2.6–8.5)             | 38.9<br>(36.2–41.8)          | 22.1<br>(20.1–24.4)          |
| <i>Cx. quinquefasciatus</i> (ER)<br>[15,16]    | Q           | 6.36·10 <sup>-1</sup><br>(4.50–9.05·10 <sup>-1</sup> ) | 5.0<br>(1.3–9.8)             | 37.7<br>(34.8–40.7)          | 21.4<br>(18.9–24.4)          |
| <b>Proportion ovipositing (pO)</b>             |             |                                                        |                              |                              |                              |
| <i>Cx. pipiens</i><br>[9,17]                   | Q           | 4.45·10 <sup>-3</sup><br>(2.54–7.77·10 <sup>-3</sup> ) | 8.2<br>(4.6–12.1)            | 33.2<br>(30.1–37.5)          | 20.8<br>(18.6–23.4)          |
| <i>Cx. quinquefasciatus</i><br>[9,15,17]       | B           | 6.67·10 <sup>-4</sup><br>(5.80–7.91·10 <sup>-4</sup> ) | 1.7<br>(0.2–4.8)             | 31.8<br>(31.1–32.2)          | 24.9<br>(21.8–26.0)          |
| <i>Cs. melanura</i><br>[14]                    | Q           | 6.31·10 <sup>-3</sup><br>(4.52–7.89·10 <sup>-3</sup> ) | 8.7<br>(6.9–10.4)            | 33.6<br>(32.5–35.4)          | 20.7<br>(16.9–22.3)          |
| <b>Egg viability (EV)</b>                      |             |                                                        |                              |                              |                              |
| <i>Ae. vexans</i><br>[18]                      |             | 1.24·10 <sup>-3</sup><br>(0.73–1.95·10 <sup>-3</sup> ) | 0<br>(0–1.6)                 | 55.5<br>(45.9–74.1)          | 27.6<br>(20.4–34.0)          |
| <i>Cx. pipiens</i><br>[12]                     | Q           | 2.11·10 <sup>-3</sup><br>(1.36–3.05·10 <sup>-3</sup> ) | 3.2<br>(0.5–7.1)             | 42.6<br>(39.7–48.3)          | 23.0<br>(20.7–26.3)          |
| <i>Cx. quinquefasciatus</i><br>[15,19]         | B           | 0.47·10 <sup>-3</sup><br>(0.34–0.62·10 <sup>-3</sup> ) | 13.6<br>(9.3–16.8)           | 38.0<br>(37.2–38.7)          | 32.1<br>(31.3–32.7)          |
| <i>Cx. theileri</i><br>[20]                    | Q           | 2.54·10 <sup>-3</sup><br>(1.86–3.41·10 <sup>-3</sup> ) | 5.5<br>(2.6–8)               | 45.4<br>(42.4–49.0)          | 23.6<br>(18.2–27.0)          |

Additional data sources for other species used for fitting priors only (priors were fit using all data except that of the focal species). Fecundity (ER): *Cx. pipiens molestus* [15], *Cx. pipiens pallens* [16], and *Ae. dorsalis* [21]. Proportion ovipositing (pO): *Cx. pipiens molestus* [15] and *Ae. dorsalis* [21]. Egg viability (EV): *Cx. pipiens molestus* [15], *Aedes dorsalis* [22], and *Ae. nigromaculis* [23]. See *Supplemental Methods: Priors for trait thermal responses*.



**Table S3: Trait thermal response functions, data sources, and posterior estimates: larval traits.** Asymmetrical responses fit with Brière function (**B**):  $B(T) = qT(T - T_{min})(T_{max} - T)^{1/2}$ ; symmetrical responses fit with quadratic function (**Q**):  $Q(T) = -q(T - T_{min})(T - T_{max})$ . Median function coefficients and optima (with 95% credible intervals).

| <i>Trait / Species</i><br>[data source]              | <i>F(x)</i> | <i>q</i> (CIs)                                        | <i>T<sub>min</sub></i> (CIs) | <i>T<sub>max</sub></i> (CIs) | <i>T<sub>opt</sub></i> (CIs) |
|------------------------------------------------------|-------------|-------------------------------------------------------|------------------------------|------------------------------|------------------------------|
| <b>Mosquito Dev. Rate (MDR)</b>                      |             |                                                       |                              |                              |                              |
| <i>Ae. triseriatus</i><br>[24]                       | B           | $4.30 \cdot 10^{-5}$<br>( $3.01-5.83 \cdot 10^{-5}$ ) | 0.8<br>(0-7.5)               | 36.5<br>(34.6-39.5)          | 29.3<br>(27.8-31.9)          |
| <i>Ae. vexans</i><br>[25,26]                         | B           | $4.33 \cdot 10^{-5}$<br>( $3.34-5.50 \cdot 10^{-5}$ ) | 1.9<br>(0.1-10.5)            | 38.2<br>(37.0-39.5)          | 30.9<br>(29.8-32.2)          |
| <i>Cx. pipiens</i><br>[9-11,17,27-29]                | B           | $3.76 \cdot 10^{-5}$<br>( $3.36-4.47 \cdot 10^{-5}$ ) | 0.1<br>(0-4.0)               | 38.5<br>(37.6-39.8)          | 30.9<br>(30.2-31.9)          |
| <i>Cx. quinquefasciatus</i><br>[9,17,24,30,31]       | B           | $4.14 \cdot 10^{-5}$<br>( $3.46-5.26 \cdot 10^{-5}$ ) | 0.1<br>(0-5.5)               | 38.6<br>(37.4-40.6)          | 31.0<br>(30.0-32.6)          |
| <i>Cx. tarsalis</i><br>[32-34]                       | B           | $4.12 \cdot 10^{-5}$<br>( $3.15-5.47 \cdot 10^{-5}$ ) | 4.3<br>(0-8.4)               | 39.9<br>(37.9-42.2)          | 32.3<br>(31.0-34.0)          |
| <i>Cs. melanura</i><br>[7]                           | B           | $2.74 \cdot 10^{-5}$<br>( $1.64-4.72 \cdot 10^{-5}$ ) | 8.6<br>(0-16.8)              | 37.6<br>(35.1-40.4)          | 31.1<br>(28.7-33.7)          |
| <b>Larval survival (p<sub>LA</sub>)</b>              |             |                                                       |                              |                              |                              |
| <i>Ae. triseriatus</i><br>[24,35]                    | Q           | $3.26 \cdot 10^{-3}$<br>( $1.95-5.18 \cdot 10^{-3}$ ) | 8.3<br>(4.9-11.4)            | 35.7<br>(32.9-39.7)          | 22.0<br>(19.9-24.6)          |
| <i>Ae. vexans</i><br>[25,26]                         | Q           | $3.29 \cdot 10^{-3}$<br>( $2.65-4.24 \cdot 10^{-3}$ ) | 9.1<br>(8.1-10.6)            | 40.8<br>(38.4-43.6)          | 25.0<br>(23.9-26.2)          |
| <i>Cx. pipiens</i><br>[9-11,17,27-29]                | Q           | $3.60 \cdot 10^{-3}$<br>( $2.96-4.42 \cdot 10^{-3}$ ) | 7.8<br>(6.1-9.3)             | 38.4<br>(37.1-39.9)          | 23.1<br>(22.2-24.0)          |
| <i>Cx. quinquefasciatus</i><br>[9,16,17,24,30,31,36] | Q           | $4.26 \cdot 10^{-3}$<br>( $3.51-5.17 \cdot 10^{-3}$ ) | 8.9<br>(7.6-9.9)             | 37.7<br>(36.2-39.2)          | 23.3<br>(22.5-24.0)          |
| <i>Cx. tarsalis</i><br>[32-34]                       | Q           | $2.12 \cdot 10^{-3}$<br>( $1.52-3.08 \cdot 10^{-3}$ ) | 5.9<br>(3.0-8.8)             | 43.1<br>(39.8-47.5)          | 24.6<br>(22.9-26.4)          |
| <i>Cs. melanura</i><br>[7]                           | Q           | $3.03 \cdot 10^{-3}$<br>( $1.55-5.68 \cdot 10^{-3}$ ) | 10.1<br>(5.7-15.1)           | 36.2<br>(32.8-40.7)          | 23.2<br>(20.4-26.5)          |

Additional data sources for other species used for fitting priors only (priors were fit using all data except that of the focal species). Mosquito Development Rate (*MDR*): *Cx. pipiens molestus* [37,38], *Cx. pipiens pallens* [37], *Cx. restuans* [10,24,33,39], *Cx. salinarius* [24], *Ae. sollicitans* [24], and *Ae. nigromaculis* [25]. Larval survival (*p<sub>LA</sub>*): *Cx. pipiens molestus* [36,38], *Cx. pipiens pallens* [16], *Cx. restuans* [10,17,24,33,39], *Cx. salinarius* [24], *Ae. sollicitans* [24], *Ae. nigromaculis* [25]. See *Supplemental Methods: Priors for trait thermal responses*.

**Table S4: Trait thermal response functions, data sources, and posterior estimates: vector competence traits.** Asymmetrical responses fit with Brière function (**B**):  $B(T) = qT(T - T_{min})(T_{max} - T)^{1/2}$ ; symmetrical responses fit with quadratic function (**Q**):  $Q(T) = -q(T - T_{min})(T - T_{max})$ . Median function coefficients and optima (with 95% credible intervals).

| <b>Trait / Species</b><br><b>[data source]</b> | <b>F(x)</b> | <b>q (CIs)</b>                                         | <b>T<sub>min</sub> (CIs)</b> | <b>T<sub>max</sub> (CIs)</b> | <b>T<sub>opt</sub> (CIs)</b> |
|------------------------------------------------|-------------|--------------------------------------------------------|------------------------------|------------------------------|------------------------------|
| <b>Transmission efficiency (b)</b>             |             |                                                        |                              |                              |                              |
| SLEV   <i>Cx. tarsalis</i><br>[40]             | Q           | 2.98·10 <sup>-3</sup><br>(1.63–5.31·10 <sup>-3</sup> ) | 10.8<br>(6.2–14.2)           | 41.6<br>(36.8–49.1)          | 26.2<br>(23.5–29.7)          |
| WEEV   <i>Cx. tarsalis</i><br>[40]             | Q           | 3.17·10 <sup>-3</sup><br>(1.65–5.06·10 <sup>-3</sup> ) | 8.2<br>(5.1–10.7)            | 33.5<br>(31.0–38.9)          | 20.9<br>(19.2–23.2)          |
| WNV   <i>Cx. tarsalis</i><br>[41]              | Q           | 2.94·10 <sup>-3</sup><br>(1.91–4.48·10 <sup>-3</sup> ) | 11.3<br>(7.6–14.0)           | 41.9<br>(37.7–47.0)          | 26.6<br>(23.9–29.3)          |
| <b>Infection efficiency (c)</b>                |             |                                                        |                              |                              |                              |
| SINV   <i>Ae. taeniorhynchus</i><br>[42]       | Q           | 1.24·10 <sup>-3</sup><br>(0.75–2.17·10 <sup>-3</sup> ) | 1.4<br>(0–9.1)               | 48.4<br>(40.8–57.1)          | 25.4<br>(21.0–31.1)          |
| SINV   <i>Cx. pipiens</i><br>[43]              | Q           | 1.33·10 <sup>-3</sup><br>(0.47–2.30·10 <sup>-3</sup> ) | 0<br>(0–0)                   | 35.0<br>(28.1–61.1)          | 17.5<br>(14.1–30.5)          |
| WNV   <i>Cx. pipiens</i><br>[44,45]            | Q           | 2.56·10 <sup>-3</sup><br>(2.05–3.19·10 <sup>-3</sup> ) | 15.6<br>(14.3–16.6)          | 52.2<br>(48.4–56.6)          | 33.9<br>(31.9–36.1)          |
| SLEV   <i>Cx. tarsalis</i><br>[40]             | Q           | 2.03·10 <sup>-3</sup><br>(1.28–3.07·10 <sup>-3</sup> ) | 8.8<br>(6.6–10.6)            | 43.7<br>(38.9–51.4)          | 26.2<br>(24.2–29.7)          |
| WEEV   <i>Cx. tarsalis</i><br>[40,46]          | Q           | 3.04·10 <sup>-3</sup><br>(2.52–3.68·10 <sup>-3</sup> ) | 1.3<br>(0.4–2.9)             | 38.8<br>(36.7–41.5)          | 15.5<br>(13.4–19.7)          |
| <b>Vector competence (bc)</b>                  |             |                                                        |                              |                              |                              |
| RVFV   <i>Ae. taeniorhynchus</i><br>[47]       | Q           | 1.51·10 <sup>-3</sup><br>(1.03–2.05·10 <sup>-3</sup> ) | 7.1<br>(2.8–9.8)             | 42.3<br>(39.3–46.5)          | 24.7<br>(22.0–27.0)          |
| EEEV   <i>Ae. triseriatus</i><br>[48]          | Q           | 1.51·10 <sup>-3</sup><br>(0.96–2.24·10 <sup>-3</sup> ) | 7.0<br>(2.9–11.9)            | 50.3<br>(42.3–63.1)          | 28.8<br>(23.6–35.8)          |
| WNV   <i>Cx. pipiens</i><br>[44]               | Q           | 3.05·10 <sup>-3</sup><br>(1.68–4.87·10 <sup>-3</sup> ) | 16.8<br>(15–17.9)            | 38.9<br>(36.1–44.1)          | 27.8<br>(26.6–30.1)          |
| WEEV   <i>Cx. tarsalis</i><br>[46]             | Q           | 1.17·10 <sup>-3</sup><br>(0.55–2.36·10 <sup>-3</sup> ) | 5.1<br>(0.6–13.3)            | 37.0<br>(33.5–46.0)          | 21.4<br>(18.1–27.3)          |
| WNV   <i>Cx. univittatus</i><br>[49]           | Q           | 2.32·10 <sup>-3</sup><br>(1.58–3.68·10 <sup>-3</sup> ) | 4.2<br>(1.5–7.1)             | 45.2<br>(39.6–53.0)          | 23.7<br>(19.4–27.3)          |

**Table S5: Trait thermal response functions, data sources, and posterior estimates: parasite development rate.** Asymmetrical responses fit with Brière function (**B**):  $B(T) = qT(T - T_{min})(T_{max} - T)^{1/2}$ ; symmetrical responses fit with quadratic function (**Q**):  $Q(T) = -q(T - T_{min})(T - T_{max})$ . Median function coefficients and optima (with 95% credible intervals).

| <i>Trait / Species</i><br>[data source]  | <i>F(x)</i> | <i>q</i> (CIs)                                             | <i>T<sub>min</sub></i> (CIs) | <i>T<sub>max</sub></i> (CIs) | <i>T<sub>opt</sub></i> (CIs) |
|------------------------------------------|-------------|------------------------------------------------------------|------------------------------|------------------------------|------------------------------|
| <b>Parasite Dev. Rate (PDR)</b>          |             |                                                            |                              |                              |                              |
| RVFV   <i>Ae. taeniorhynchus</i><br>[47] | B           | 8.84 · 10 <sup>-5</sup><br>(2.51–15.5 · 10 <sup>-5</sup> ) | 9.0<br>(5.4–13.8)            | 45.9<br>(41.9–50.3)          | 37.8<br>(34.5–41.3)          |
| EEEV   <i>Ae. triseriatus</i><br>[48]    | B           | 7.05 · 10 <sup>-5</sup><br>(5.21–9.68 · 10 <sup>-5</sup> ) | 11.6<br>(7.0–16.4)           | 44.8<br>(40.6–49.4)          | 37.2<br>(33.8–41.1)          |
| WNV   <i>Cx. pipiens</i><br>[44,45]      | B           | 7.38 · 10 <sup>-5</sup><br>(5.38–9.94 · 10 <sup>-5</sup> ) | 11.4<br>(7.3–15.0)           | 45.2<br>(40.7–50.3)          | 37.5<br>(33.8–41.6)          |
| WNV   <i>Cx. quinquefasciatus</i> [50]   | B           | 7.12 · 10 <sup>-5</sup><br>(4.58–10.2 · 10 <sup>-5</sup> ) | 19.0<br>(12.9–21.0)          | 44.1<br>(38.8–50.4)          | 37.7<br>(33.6–42.7)          |
| SLEV   <i>Cx. tarsalis</i><br>[40]       | B           | 7.11 · 10 <sup>-5</sup><br>(5.60–8.95 · 10 <sup>-5</sup> ) | 12.8<br>(10.3–14.3)          | 45.2<br>(40.2–51.5)          | 37.7<br>(33.8–42.6)          |
| WEEV   <i>Cx. tarsalis</i><br>[40,46]    | B           | 6.43 · 10 <sup>-5</sup><br>(4.44–10.4 · 10 <sup>-5</sup> ) | 4.0<br>(0–12.6)              | 44.0<br>(38.3–50.9)          | 35.7<br>(31.0–41.4)          |
| WNV   <i>Cx. tarsalis</i><br>[41]        | B           | 6.57 · 10 <sup>-5</sup><br>(5.11–8.85 · 10 <sup>-5</sup> ) | 11.2<br>(7.9–14.9)           | 44.7<br>(40.4–49.4)          | 37.0<br>(33.6–40.9)          |
| WNV   <i>Cx. univittatus</i><br>[49]     | B           | 7.54 · 10 <sup>-5</sup><br>(4.13–11.1 · 10 <sup>-5</sup> ) | 10.2<br>(7.1–15.3)           | 34.4<br>(31.2–51.1)          | 28.8<br>(26.1–42.5)          |
| SINV   <i>Ae. taeniorhynchus</i><br>[42] | NA          | Not fitted because lack of temperature sensitivity         |                              |                              |                              |

**Table S6: Trait thermal response functions, data sources, and posterior estimates: lifespan.** Responses fit with a linear function (**L**):  $L(T) = -mT + z$ . Median function coefficients and  $T_{max}$  (with 95% credible intervals).

| <i>Trait / Species</i><br>[data source] | <i>F(x)</i> | <i>m</i>         | <i>z</i>            | <i>T<sub>max</sub> = z/m</i> |
|-----------------------------------------|-------------|------------------|---------------------|------------------------------|
| <b>Lifespan (lf)</b>                    |             |                  |                     |                              |
| <i>Ae. taeniorhynchus</i> [51]          | L           | 2.02 (1.59–3.19) | 85.9 (73.8–117.6)   | 42.7 (34.5–48.5)             |
| <i>Cx. pipiens</i> [11,17,52]           | L           | 4.86 (3.83–5.84) | 169.8 (142.1–195.6) | 34.9 (32.9–37.9)             |
| <i>Cx. quinquefasciatus</i><br>[17,36]  | L           | 3.80 (1.85–5.29) | 136.3 (86.8–174.0)  | 35.9 (32.1–48.5)             |
| <i>Cx. tarsalis</i> [32]                | L           | 1.69 (1.12–2.24) | 69.6 (55.8–83.5)    | 41.3 (36.6–50.8)             |

Additional data sources for other species used for fitting priors only (priors were fit using all data except that of the focal species). Lifespan (*lf*): *Cx. pipiens molestus* [36,37], *Cx. pipiens pallens* [37], and *Cx. restuans* [17]. See *Supplemental Methods: Priors for trait thermal responses*.

**Table S7: Priors for trait thermal response functions: mosquito traits with unimodal responses.** Gamma distribution parameters ( $\alpha$  [shape] and  $\beta$  [rate]) for priors for fitting thermal response parameters ( $T_{min}$ ,  $T_{max}$ , and  $q$ ). Scaled variances are noted in parentheses, either by the system name (applied to all parameters) or by individual parameters. See *Supplemental Methods: Priors for trait thermal responses*.

| <b>Trait / System</b>                        | <b><math>q: \alpha</math></b> | <b><math>q: \beta</math></b> | <b><math>T_{min}: \alpha</math></b> | <b><math>T_{min}: \beta</math></b> | <b><math>T_{max}: \alpha</math></b> | <b><math>T_{max}: \beta</math></b> |
|----------------------------------------------|-------------------------------|------------------------------|-------------------------------------|------------------------------------|-------------------------------------|------------------------------------|
| <b>Biting rate (<math>a</math>)</b>          |                               |                              |                                     |                                    |                                     |                                    |
| <i>Cx. pipiens</i> (0.5)                     | 8.84                          | 64200                        | 1.91                                | 0.367                              | 103                                 | 3.00                               |
| <i>Cx. quinquefasciatus</i>                  | 39.1<br>(0.1)                 | 234133<br>(0.1)              | 8.82<br>(0.1)                       | 0.997<br>(0.1)                     | 2992                                | 75.8                               |
| <i>Cx. tarsalis</i>                          | 40.1<br>(0.05)                | 227752<br>(0.05)             | 18.7<br>(0.05)                      | 1.745<br>(0.05)                    | unif.                               | unif.                              |
| <i>Cs. melanura</i>                          | 35.4<br>(0.75)                | 229694<br>(0.75)             | 7.77<br>(0.75)                      | 0.895<br>(0.75)                    | 2714<br>(0.1)                       | 68.5<br>(0.1)                      |
| <b>Fecundity</b>                             |                               |                              |                                     |                                    |                                     |                                    |
| <i>Cx. pipiens</i> (EFGC) (3)                | 9.23                          | 15.6                         | 2.38                                | 0.419                              | 139                                 | 3.52                               |
| <i>Cx. quinquefasciatus</i> (ER)             | 19.1                          | 30.44                        | 2.87                                | 0.600                              | 486                                 | 13.2                               |
| <b>Prop. ovipositing (<math>pO</math>)</b>   |                               |                              |                                     |                                    |                                     |                                    |
| <i>Cx. pipiens</i> (0.5)                     | 9.50                          | 1823                         | 14.8                                | 1.495                              | 263                                 | 7.14                               |
| <i>Cx. quinquefasciatus</i>                  | 32.9                          | 55242                        | 1.41                                | 0.397                              | 3346                                | 106                                |
| <i>Cs. melanura</i>                          | 14.4                          | 2635                         | 22.0                                | 2.254                              | 588                                 | 16.8                               |
| <b>Egg viability (<math>EV</math>)</b>       |                               |                              |                                     |                                    |                                     |                                    |
| <i>Ae. vexans</i> (0.01)                     | 26.6                          | 12259                        | 11.6                                | 1.916                              | 486                                 | 10.8                               |
| <i>Cx. pipiens</i> (0.2)                     | 29.4                          | 14525                        | 8.83                                | 1.579                              | 514                                 | 11.1                               |
| <i>Cx. quinquefasciatus</i> (0.1)            | 101                           | 262268                       | 1.08                                | 1.032                              | 1361                                | 34.9                               |
| <i>Cx. theileri</i>                          | 5.86                          | 2266                         | 4.46                                | 0.591                              | 266                                 | 6.06                               |
| <b>Mos. dev. rate (MDR)</b>                  |                               |                              |                                     |                                    |                                     |                                    |
| <i>Ae. triseriatus</i> (0.2)                 | 118                           | 2697528                      | 1.93                                | 0.703                              | 5542                                | 145                                |
| <i>Ae. vexans</i> (0.5)                      | 119                           | 2739401                      | 1.89                                | 0.689                              | 6661                                | 174                                |
| <i>Cx. pipiens</i> (0.1)                     | 71.9                          | 1545915                      | 2.03                                | 0.596                              | 2912                                | 76.5                               |
| <i>Cx. quinquefasciatus</i> (0.1)            | 113                           | 2569782                      | 1.81                                | 0.651                              | 5900                                | 155                                |
| <i>Cx. tarsalis</i> (0.1)                    | 129                           | 2940582                      | 1.49                                | 0.660                              | 6431                                | 169                                |
| <i>Cs. melanura</i> (0.1)                    | 129                           | 2941063                      | 1.78                                | 0.685                              | 6915                                | 181                                |
| <b>Larval survival (<math>p_{LA}</math>)</b> |                               |                              |                                     |                                    |                                     |                                    |
| <i>Ae. triseriatus</i> (0.05)                | 163                           | 46723                        | 231                                 | 27.3                               | 4667                                | 122                                |
| <i>Ae. vexans</i> (0.05)                     | 135                           | 37701                        | 210                                 | 24.6                               | 4040                                | 107                                |
| <i>Cx. pipiens</i> (0.1)                     | 102                           | 27382                        | 217                                 | 24.2                               | 2872                                | 76.7                               |
| <i>Cx. quinquefasciatus</i> (0.1)            | 88.8                          | 26461                        | 123                                 | 14.8                               | 2608                                | 68.4                               |
| <i>Cx. tarsalis</i> (0.025)                  | 94.6                          | 23240                        | 237                                 | 26.2                               | 2564                                | 69.5                               |
| <i>Cs. melanura</i> (0.05)                   | 148.9                         | 41533                        | 239                                 | 27.8                               | 4391                                | 116                                |

**Table S8: Priors for trait thermal response functions: infection traits.** Gamma distribution parameters ( $\alpha$  [shape] and  $\beta$  [rate]) for priors for fitting thermal response parameters ( $T_{min}$ ,  $T_{max}$ , and  $q$ ). Scaled variances are noted in parentheses, either by the system name (applied to all parameters) or by individual parameters. See *Supplemental Methods: Priors for trait thermal responses*.

| <i>Trait / System</i>                  | $q: \alpha$ | $q: \beta$ | $T_{min}: \alpha$ | $T_{min}: \beta$ | $T_{max}: \alpha$ | $T_{max}: \beta$ |
|----------------------------------------|-------------|------------|-------------------|------------------|-------------------|------------------|
| <b>Transmission efficiency (b)</b>     | 7.72        | 3202       | 9.97              | 1.268            | 114               | 2.9              |
| SLEV   <i>Cx. tarsalis</i> (0.5)       | 9.49        | 2373       | 79.6              | 6.181            | 153               | 3.74             |
| WEEV   <i>Cx. tarsalis</i> (0.1)       | 8.46        | 3056       | 12.1              | 1.455            | 134               | 3.5              |
| WNV   <i>Cx. tarsalis</i>              | 7.72        | 3202       | 9.97              | 1.268            | 114               | 2.9              |
| <b>Infection efficiency (c)</b>        |             |            |                   |                  |                   |                  |
| SINV   <i>Ae. taeniorhynchus</i> (0.1) | 61.7        | 45102      | 2.49              | 0.815            | 1214              | 25.1             |
| SINV   <i>Cx. pipiens</i> (0.01)       | 57.3        | 40236      | 2.64              | 0.799            | 1124              | 23.28            |
| WNV   <i>Cx. pipiens</i>               | 28.5        | 15944      | 1.44              | 0.852            | 237               | 5.393            |
| SLEV   <i>Cx. tarsalis</i>             | 65.2        | 46656      | 1.67              | 0.692            | 1071              | 22.2             |
|                                        | (0.01)      | (0.01)     | (0.01)            | (0.01)           | (0.1)             | (0.1)            |
| WEEV   <i>Cx. tarsalis</i> (0.01)      | 82.2        | 35791      | 392               | 30.502           | 1264              | 26.1             |
| <b>Vector competence (bc)</b>          |             |            |                   |                  |                   |                  |
| RVFV   <i>Ae. taeniorhynchus</i> (2)   | 8.4         | 4775       | 2.316             | 0.421            | 147               | 3.39             |
| EEEV   <i>Ae. triseriatus</i>          | 6.68        | 3612       | 2.027             | 0.383            | 119               | 2.86             |
|                                        | (3)         | (3)        | (3)               | (3)              | (0.01)            | (0.01)           |
| WNV   <i>Cx. pipiens</i> (0.5)         | 17.6        | 7857       | 1.403             | 0.534            | 219               | 5.42             |
| WEEV   <i>Cx. tarsalis</i> (0.5)       | 9.56        | 5344       | 3.021             | 0.498            | 180               | 4.05             |
| WNV   <i>Cx. univittatus</i>           | 13.7        | 2327       | 380               | 22.434           | 527               | 14.4             |
|                                        | (0.01)      | (0.01)     | (0.01)            | (0.01)           | (0.1)             | (0.1)            |
| <b>Parasite dev. rate (PDR)</b>        |             |            |                   |                  |                   |                  |
| RVFV   <i>Ae. taeniorhynchus</i>       | 20.2        | 331065     | 8.69              | 0.893            | 227               | 4.96             |
|                                        | (0.2)       | (0.2)      | (2)               | (2)              | (2)               | (2)              |
| EEEV   <i>Ae. triseriatus</i> (2)      | 13.2        | 167635     | 6.76              | 0.609            | 183               | 4.05             |
| WNV   <i>Cx. pipiens</i>               | 8.71        | 113904     | 3.51              | 0.356            | 140               | 3.17             |
|                                        | (2)         | (2)        | (5)               | (5)              | (2)               | (2)              |
| WNV   <i>Cx. quinquefasciatus</i>      | 15.8        | 201154     | 8.09              | 0.772            | 202               | 4.44             |
| SLEV   <i>Cx. tarsalis</i>             | 11.8        | 151149     | 6.31              | 0.584            | 179               | 3.97             |
| WEEV   <i>Cx. tarsalis</i>             | 10.3        | 117795     | 9.97              | 0.768            | 162               | 3.62             |
|                                        |             |            | (0.05)            | (0.05)           |                   |                  |
| WNV   <i>Cx. tarsalis</i> (2)          | 11.7        | 148079     | 5.92              | 0.541            | 169               | 3.77             |
| WNV   <i>Cx. univittatus</i>           | 12.3        | 146439     | 9.02              | 0.773            | 174               | 3.87             |
|                                        |             |            | (3)               | (3)              | (0.2)             | (0.2)            |

**Table S9: Priors for trait thermal response functions: lifespan.** Gamma distribution parameters ( $\alpha$  [shape] and  $\beta$  [rate]) for priors for fitting thermal response parameters ( $m$  and  $z$ ). Scaled variances are noted in parentheses, either by the system name (applied to all parameters) or by individual parameters. See *Supplemental Methods: Priors for trait thermal responses*.

| <b><i>Trait / System (var.)</i></b> | <b><i>m: <math>\alpha</math></i></b> | <b><i>m: <math>\beta</math></i></b> | <b><i>z: <math>\alpha</math></i></b> | <b><i>z: <math>\beta</math></i></b> |
|-------------------------------------|--------------------------------------|-------------------------------------|--------------------------------------|-------------------------------------|
| <b>Lifespan (<i>lf</i>)</b>         |                                      |                                     |                                      |                                     |
| <i>Ae. taeniorhynchus</i> (0.01)    | 119                                  | 52.9                                | 268                                  | 3.19                                |
| <i>Cx. pipiens</i> (0.01)           | 117                                  | 42.4                                | 238                                  | 2.39                                |
| <i>Cx. quinquefasciatus</i> (0.01)  | 110                                  | 32.9                                | 207                                  | 1.78                                |
| <i>Cx. tarsalis</i> (0.1)           | 124                                  | 43.0                                | 249                                  | 2.42                                |

## Supplemental Methods: Priors for trait thermal responses

We used gamma distribution parameters ( $\alpha$  [shape] and  $\beta$  [rate]) for informative priors for each thermal response parameter (Brière and quadratic functions:  $T_{min}$ ,  $T_{max}$ , and  $q$ ); linear functions:  $m$  and  $z$ ). First, we fit a thermal response function (with uniform priors) to all the *Aedes* and *Culex* data for a given trait except that of the focal vector species or vector–virus pair (i.e., the parameters for the priors for  $a$  for *Culex pipiens* were fit to the  $a$  data for all species except *Cx. pipiens*). Then we used the ‘MASS’ package in R to fit a gamma distribution hyperparameters to the distribution from each thermal response parameters.

The mean of the gamma distribution is equal to  $\alpha/\beta$ , while the variance is determined by the magnitude of the parameters (smaller values = higher variance). When fitting thermal responses, the appropriate strength for the priors depends on the amount of data used to fit the priors and the amount of the data for the focal trait. Prior strengths can be modified by scaling the variance (i.e., multiplying the gamma parameters by  $<1$  to increase the variance or  $>1$  to decrease the variance) without impacting the mean. In many cases we had to increase the variance because of the large number of data points used to fit priors. In a few cases, we had to decrease the variation (e.g., to constrain  $T_{max}$  for Briere functions for *PDR* where we had no observations at high temperatures, in order to make it so *PDR* would not constrain  $R_0$  where there was no data). For biting rate ( $a$ ) for *Culex tarsalis*, we used a likelihood function where  $T_{min}$  and  $q$  had data informed priors and  $T_{max}$  had uniform priors (as used to fit the priors) in order to best capture the thermal response of the data.

## Supplemental Methods: Sensitivity and uncertainty analyses

We performed two sensitivity analyses and one uncertainty analysis to understand what traits were most important for determining and contributing to uncertainty in the thermal limits and optima. For the first sensitivity analysis, we calculated the partial derivatives of  $R_0$  with respect to each trait across temperature ( $T$ ) and multiplied it by the derivative of the trait with temperature (i.e., the slope of the thermal response). Equations S3-S6 (below) apply to both versions of the  $R_0$  model (eqs. S1 and S2). Equation S3 is for all traits ( $x$ ) that appear once in the numerator. Equation S4, for biting rate ( $a$ ), differs from previous analyses [2–6] because biting rate was cubed to account for fecundity measured per gonotrophic cycle rather than per day. Equation S5 is for parasite development rate ( $PDR$ ), and equation S6 is for lifespan ( $lf$ ).

$$\frac{\partial R_0}{\partial x} \cdot \frac{\partial x}{\partial T} = \frac{R_0}{2x} \cdot \frac{\partial x}{\partial T} \quad \text{eq. S3}$$

$$\frac{\partial R_0}{\partial a} \cdot \frac{\partial a}{\partial T} = \frac{3R_0}{2a} \cdot \frac{\partial a}{\partial T} \quad \text{eq. S4}$$

$$\frac{\partial R_0}{\partial PDR} \cdot \frac{\partial PDR}{\partial T} = \frac{R_0}{2 lf PDR^2} \cdot \frac{\partial PDR}{\partial T} \quad \text{eq. S5}$$

$$\frac{\partial R_0}{\partial lf} \cdot \frac{\partial lf}{\partial T} = \frac{R_0(1+3PDR)}{2 PDR lf^2} \cdot \frac{\partial lf}{\partial T} \quad \text{eq. S6}$$

For the second sensitivity analysis, we held single traits constant while allowing all other traits to vary with temperature. For the uncertainty analysis, we calculated the ‘total uncertainty’ across temperature as the width of the 95% highest posterior density (HPD) interval across temperature for the full model. Then, we calculated the HPD for ‘uncertainty for each trait’ by fixing all traits except the focal trait at their posterior median value across temperature, while keeping the full posterior sample of the focal trait. Then, we divided the uncertainty for each trait by the total uncertainty, calculated across temperature, to estimate the proportion of uncertainty in  $R_0$  that was due to the uncertainty in the focal trait.



**Figure S1: Thermal responses for mosquito traits in additional vector species: *Ae. taeniorhynchus* (green), *Ae. triseriatus* (violet), *Aedes vexans* (teal), *Cx. theileri* (pink), and *Culiseta melanura* (brown). (A) Mosquito development rate (*MDR*), (B) larval-to-adult survival (*pLA*), and (C) biting rate (*a*), (D) lifespan (*lf*), (E) proportion ovipositing (*pO*) and (F) egg viability (*EV*). Points without error bars are reported means from single studies; points with error bars are averages of means from multiple studies (+/- standard error, for visual clarity only; thermal responses were fit to reported means). Solid lines are posterior distribution means; shaded areas are 95% credible intervals.**

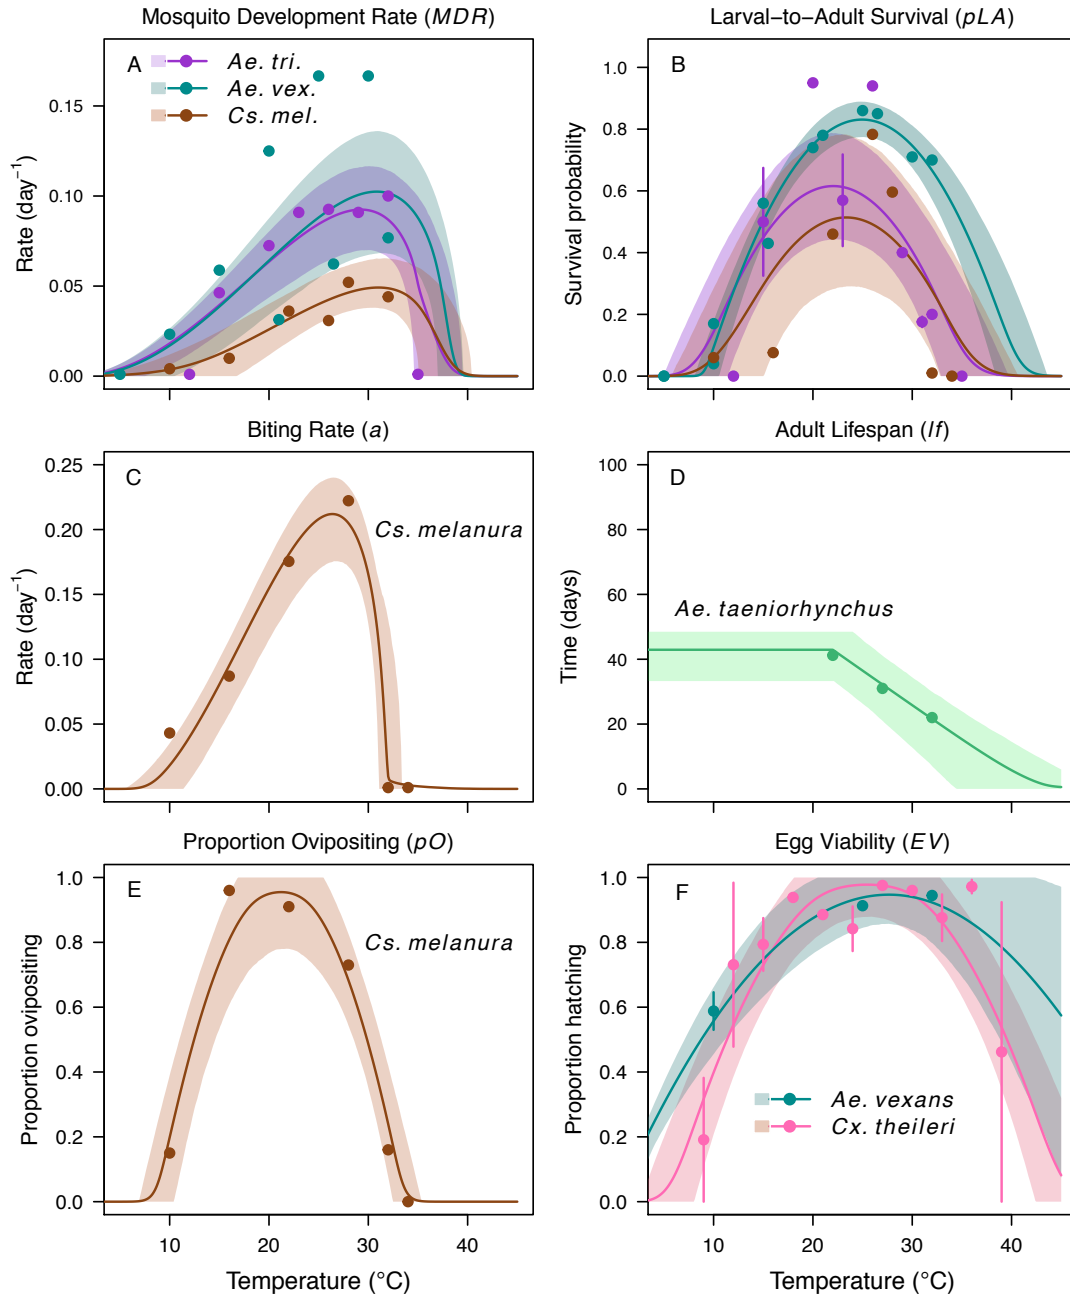

**Figure S2: Thermal responses for biting rate ( $a$ ) showing individual data points.** (A) *Culex pipiens*, (B) *Cx. quinquefasciatus*, (C) *Cx. tarsalis*, and (D) *Culiseta melanura*. Solid lines are posterior distribution means for the mean thermal response; black dashed lines are 95% credible intervals for the mean thermal response; red dashed lines are 95% prediction intervals for observed data (incorporating the fitted variance).

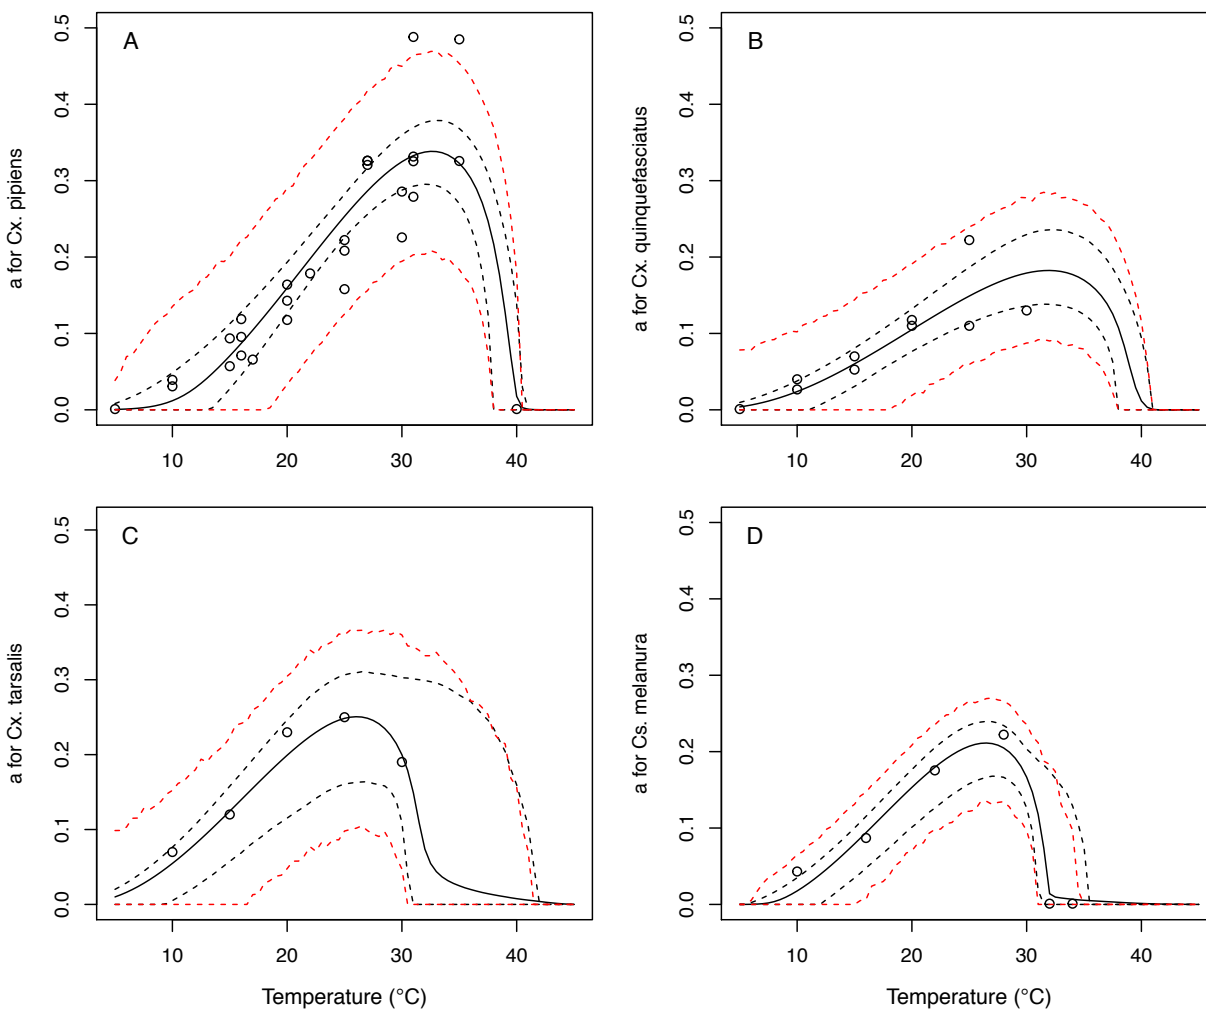

**Figure S3: Thermal responses for larval-to-adult survival ( $pLA$ ) showing individual data points.** (A) *Culex pipiens*, (B) *Cx. quinquefasciatus*, (C) *Cx. tarsalis*, (D) *Aedes vexans*, (E) *Ae. triseriatus*, and (F) *Culiseta melanura*. Solid lines are posterior distribution means for the mean thermal response; black dashed lines are 95% credible intervals for the mean thermal response; red dashed lines are 95% prediction intervals for observed data (incorporating the fitted variance).

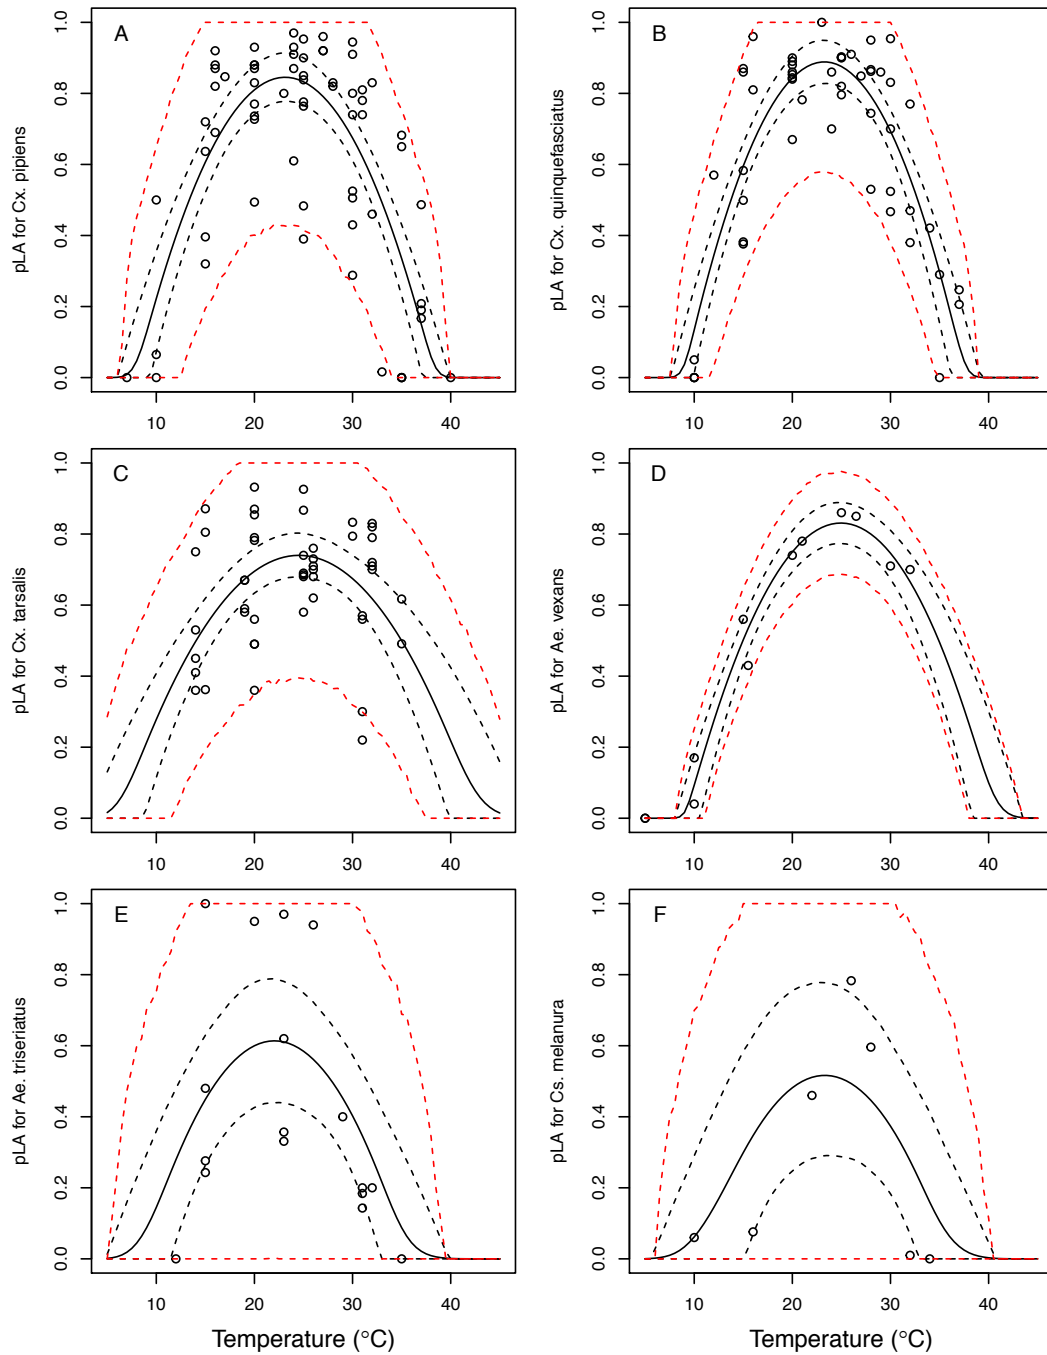

**Figure S4: Thermal responses for mosquito development rate (*MDR*) showing individual data points.** (A) *Culex pipiens*, (B) *Cx. quinquefasciatus*, (C) *Cx. tarsalis*, (D) *Aedes vexans*, (E) *Ae. triseriatus*, and (F) *Culiseta melanura*. Solid lines are posterior distribution means for the mean thermal response; black dashed lines are 95% credible intervals for the mean thermal response; red dashed lines are 95% prediction intervals for observed data (incorporating the fitted variance).

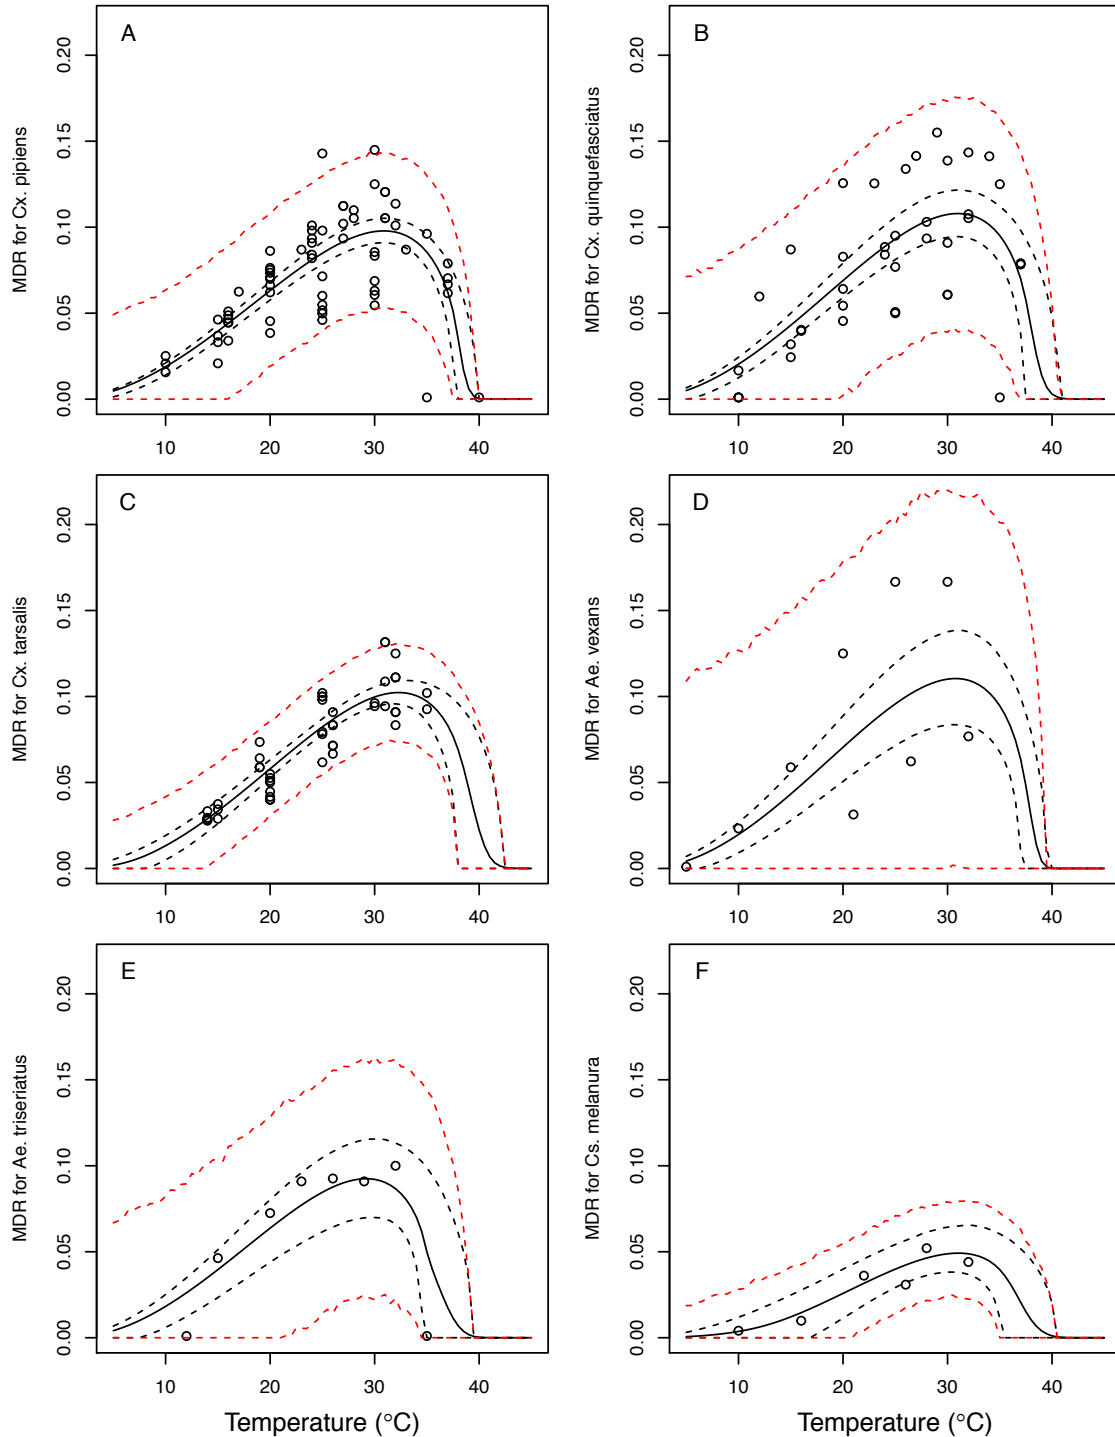

**Figure S5: Thermal responses for adult mosquito lifespan (*lf*) showing individual data points.** (A) *Culex pipiens*, (B) *Cx. quinquefasciatus*, (C) *Cx. tarsalis*, and (D) *Aedes taeniorhynchus*. When data were reported by sex, only female data were used. Solid lines are posterior distribution means for the mean thermal response; black dashed lines are 95% credible intervals for the mean thermal response; red dashed lines are 95% prediction intervals for observed data (incorporating the fitted variance).

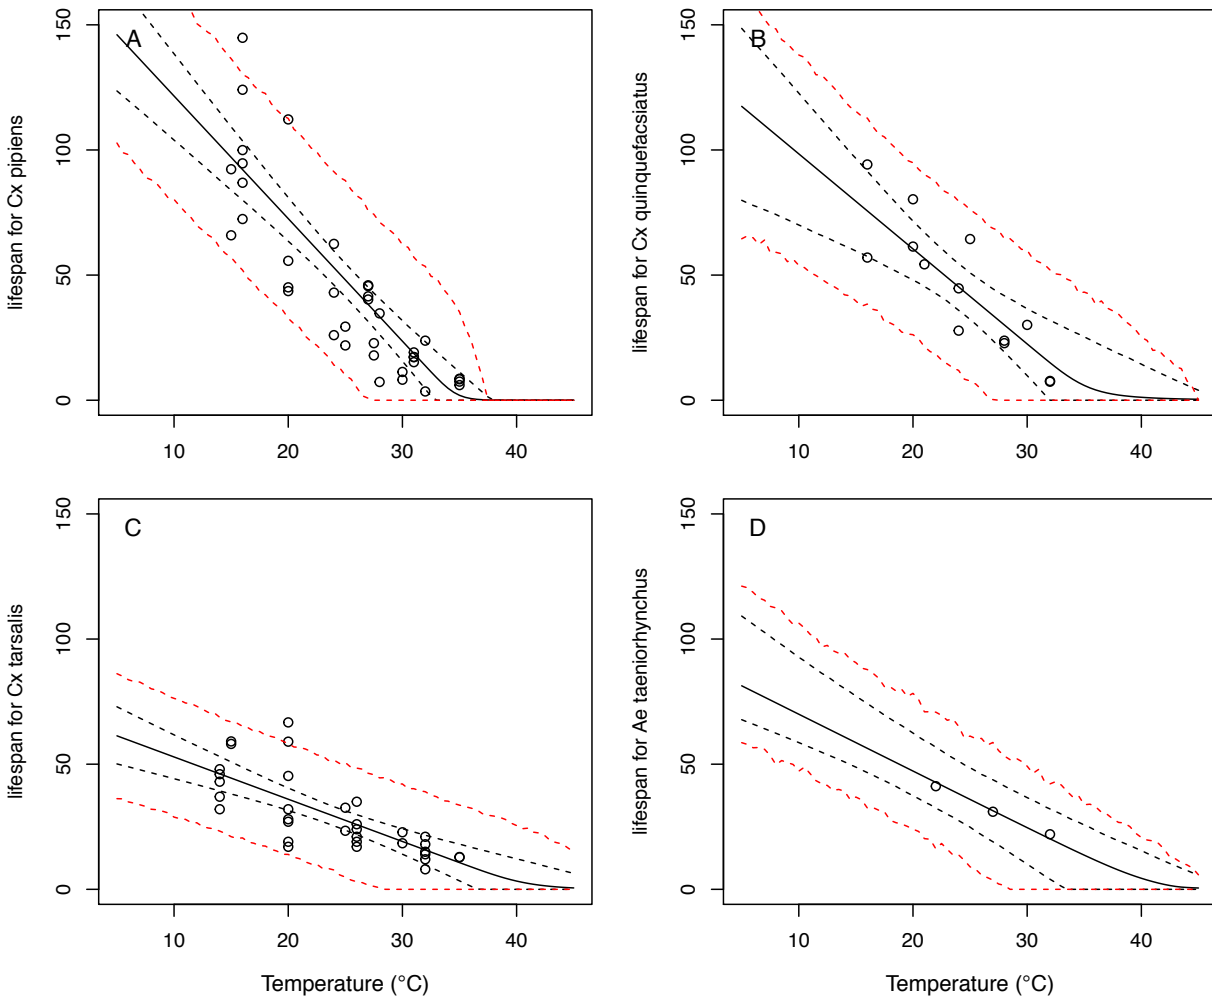

**Figure S6: Thermal responses for fecundity traits showing individual data points.** Traits: (A) Reproduction measured as eggs per female per gonotrophic cycle (*EFGC*), (B) reproduction measured as eggs per raft (*ER*) (C–E) proportion ovipositing (*pO*), and (F–I) egg viability (*EV*). Vector species: (A,C,F) *Culex pipiens*, (B,D,G), *Cx. quinquefasciatus*, (E) *Culiseta melanura*, (H) *Cx. theileri*, and (I) *Aedes vexans*. Solid lines are posterior distribution means for the mean thermal response; black dashed lines are 95% credible intervals for the mean thermal response; red dashed lines are 95% prediction intervals for observed data (incorporating the fitted variance).

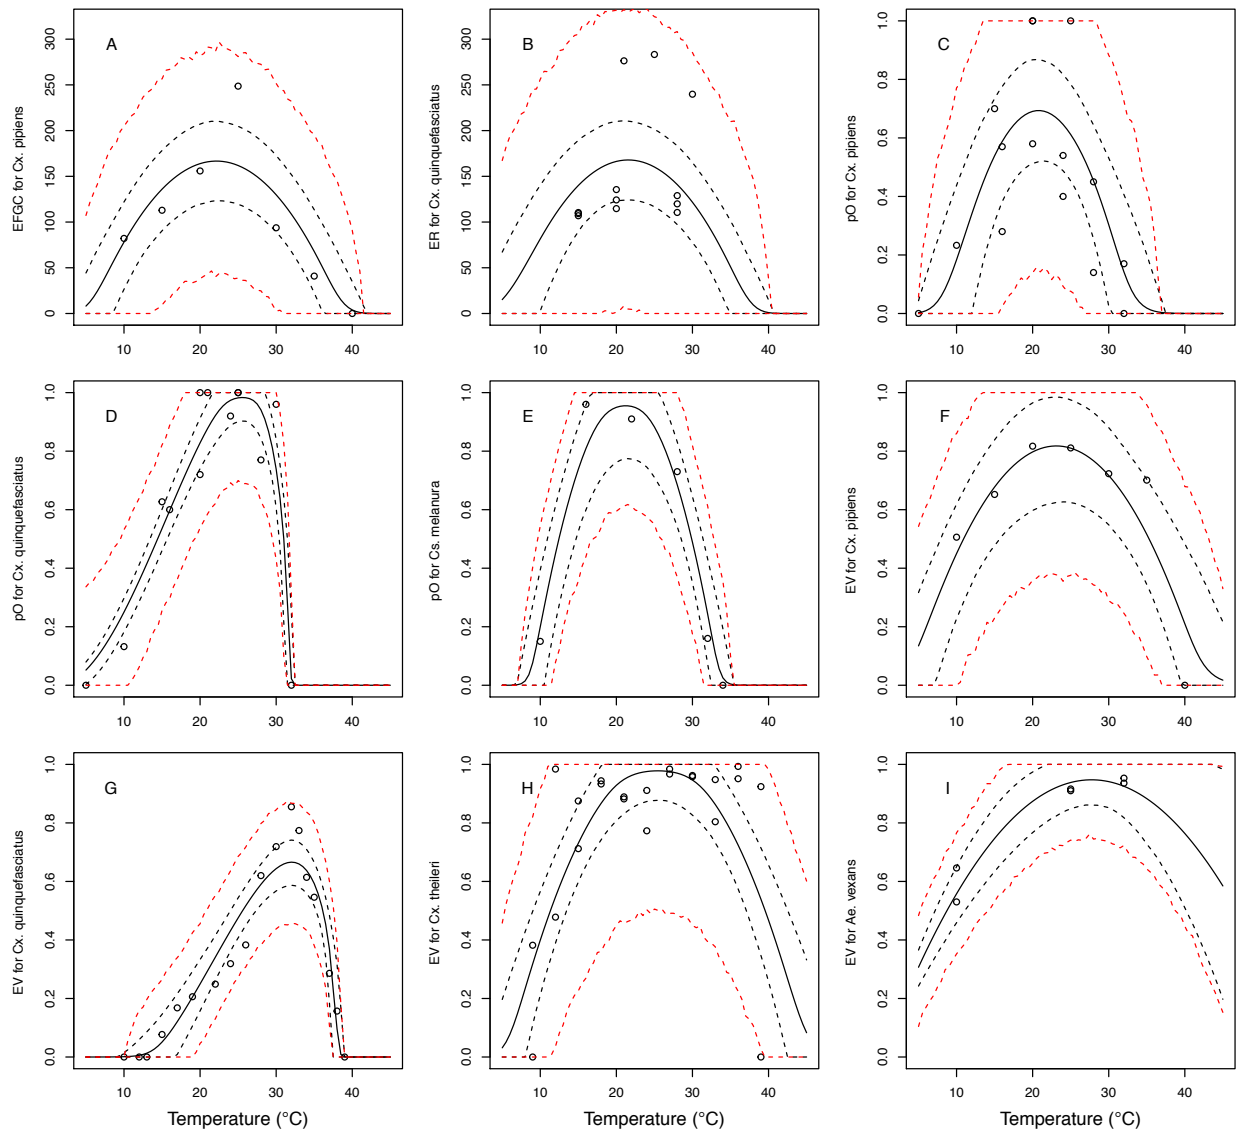

**Figure S7: Thermal responses for pathogen development rate (PDR) showing individual data points.** (A) West Nile virus (WNV) in *Culex pipiens*, (B), WNV in *Cx. quinquefasciatus*, (C) WNV in *Cx. tarsalis*, (D) WNV in *Cx. univittatus*, (E) St. Louis Encephalitis virus (SLEV) in *Cx. tarsalis*, (F) Western Equine Encephalitis virus (WEEV) in *Cx. tarsalis*, and (G) Eastern Equine Encephalitis virus (EEEV) in *Aedes triseriatus*. Solid lines are posterior distribution means for the mean thermal response; black dashed lines are 95% credible intervals for the mean thermal response; red dashed lines are 95% prediction intervals for observed data (incorporating the fitted variance).

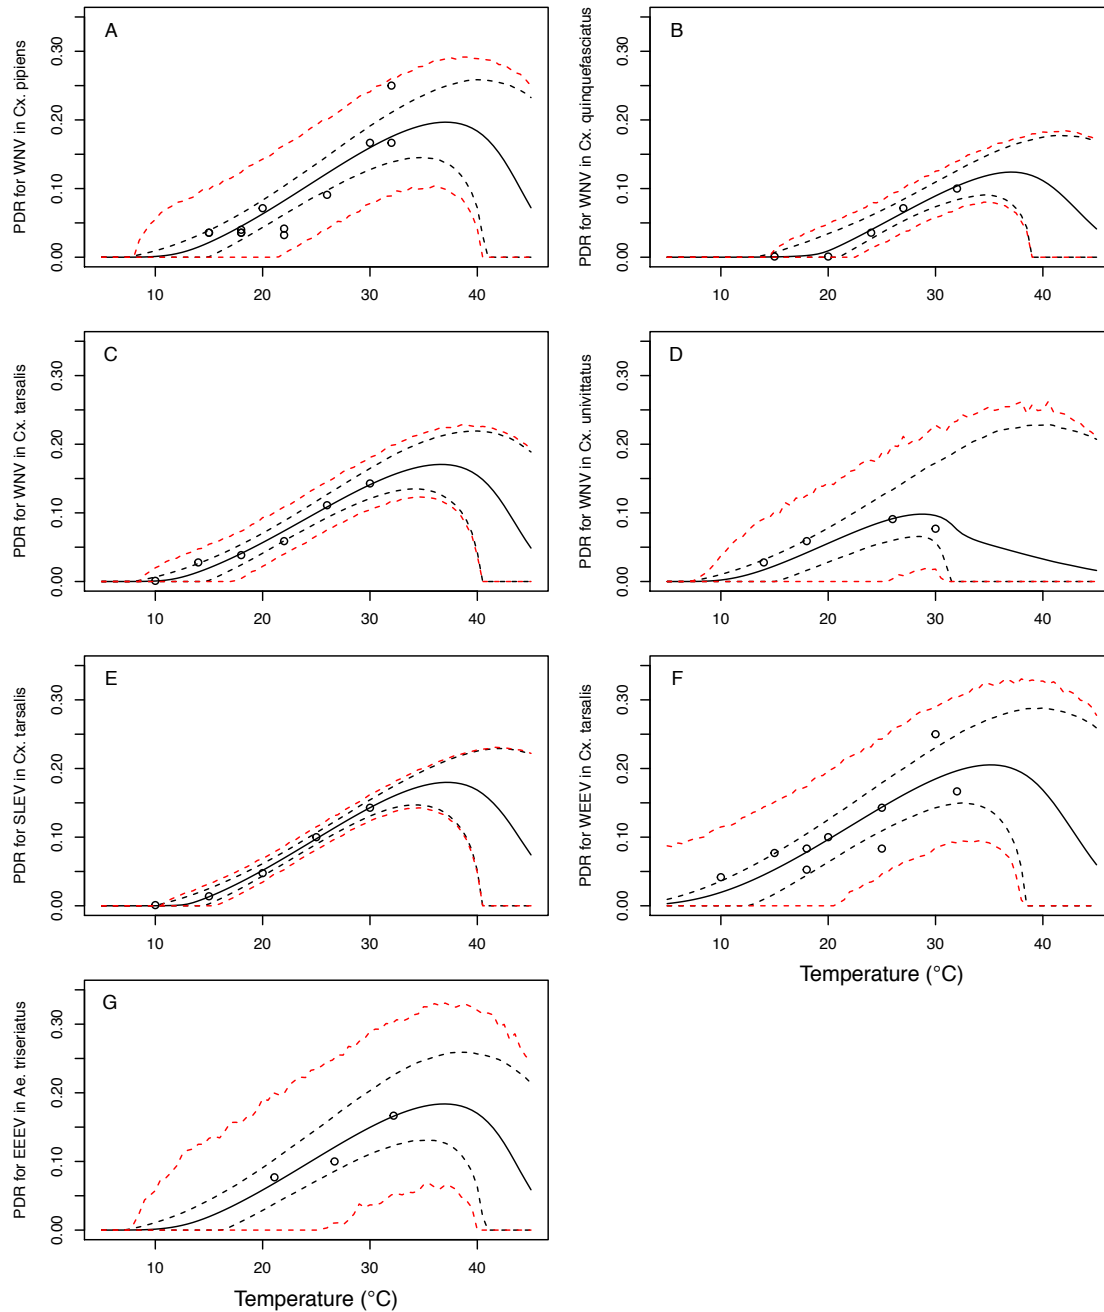

**Figure S8: Thermal responses for vector competence traits in *Culex tarsalis*, showing individual data points.** Traits: (A,B,F) transmission efficiency ( $b$ , # transmitting / # infected), (C,E) infection efficiency ( $c$ , # infected / # exposed), and (D) vector competence ( $bc$ , # infected / # exposed). Viruses: (A) West Nile virus (WNV), (B–D) Western Equine Encephalitis virus (WEEV), (E,F) St. Louis Encephalitis virus (SLEV). Solid lines are posterior distribution means for the mean thermal response; black dashed lines are 95% credible intervals for the mean thermal response; red dashed lines are 95% prediction intervals for observed data (incorporating the fitted variance).

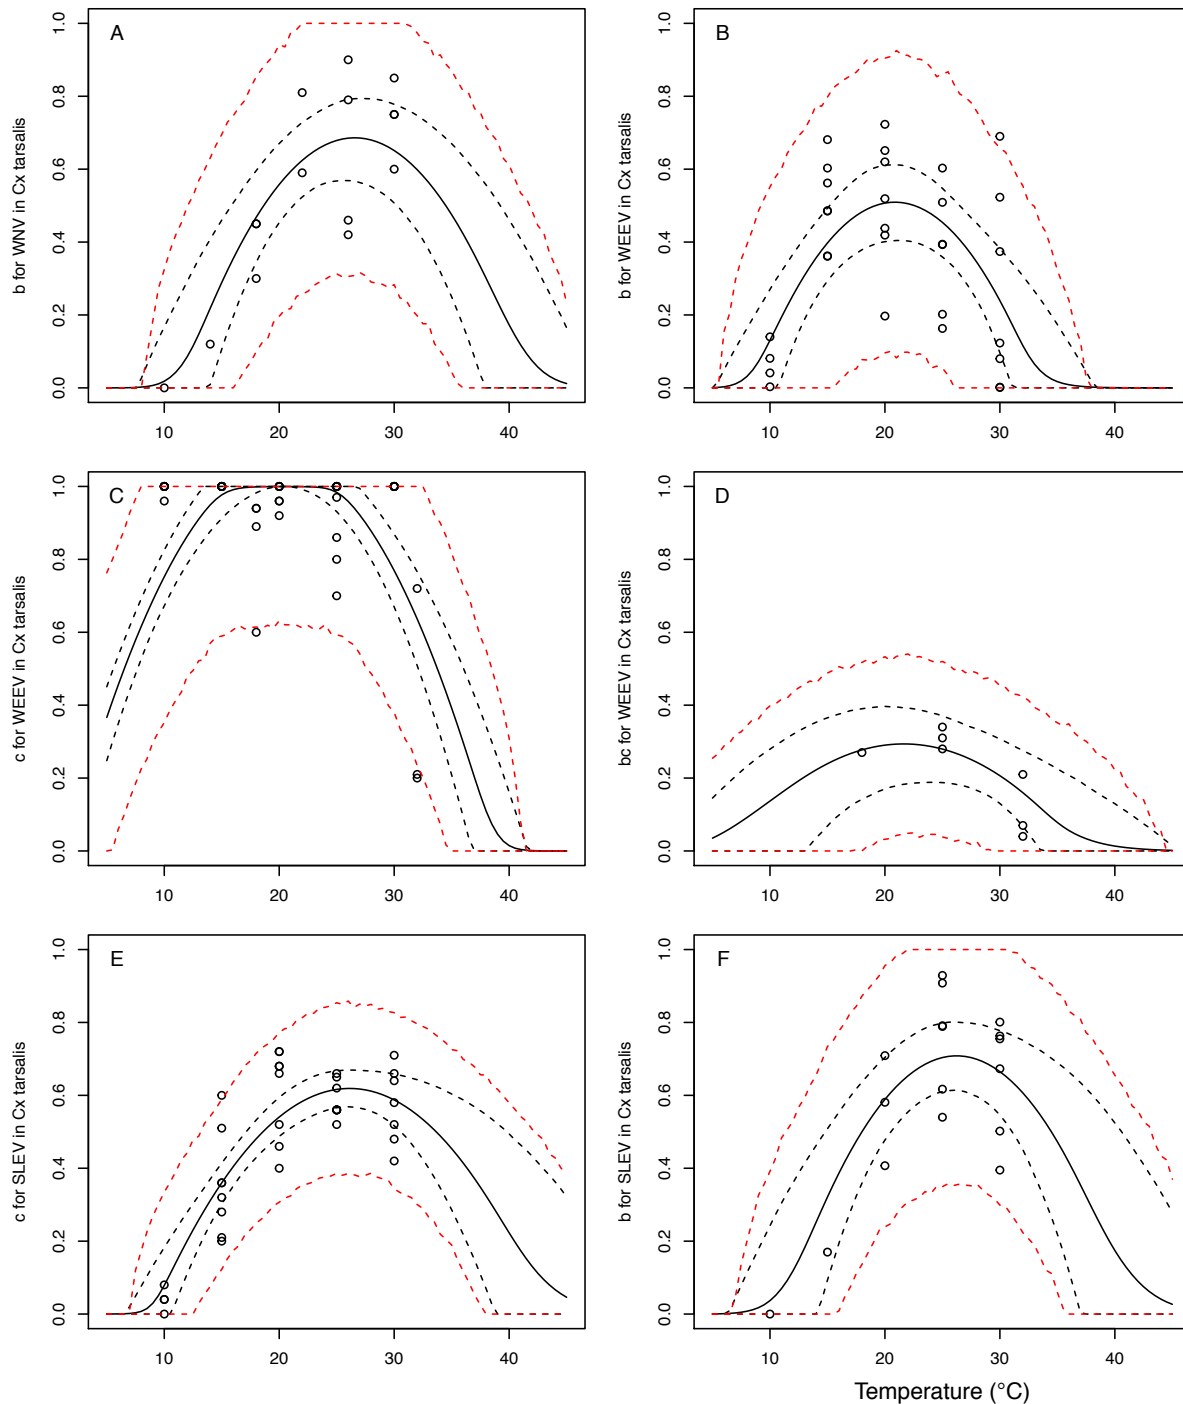



**Figure S9: Thermal responses for vector competence traits showing individual data points.**

Traits: (A,E,F) infection efficiency ( $c$ , # infected / # exposed) and (B,C,D,G) vector competence ( $bc$ , # infected / # exposed). Viruses and vectors: (A,B) West Nile virus (WNV) in *Culex pipiens*, (C) WNV in *Cx. univittatus*, (D) Eastern Equine Encephalitis virus (EEEV) in *Ae. triseriatus*, (E) Sindbis virus (SINV) in *Culex pipiens*, (F) SINV in *Aedes taeniorhynchus*, and (G) Rift Valley Fever virus (RVFV) in *Ae. taeniorhynchus*. Solid lines are posterior distribution means for the mean thermal response; black dashed lines are 95% credible intervals for the mean thermal response; red dashed lines are 95% prediction intervals for observed data (incorporating the fitted variance).

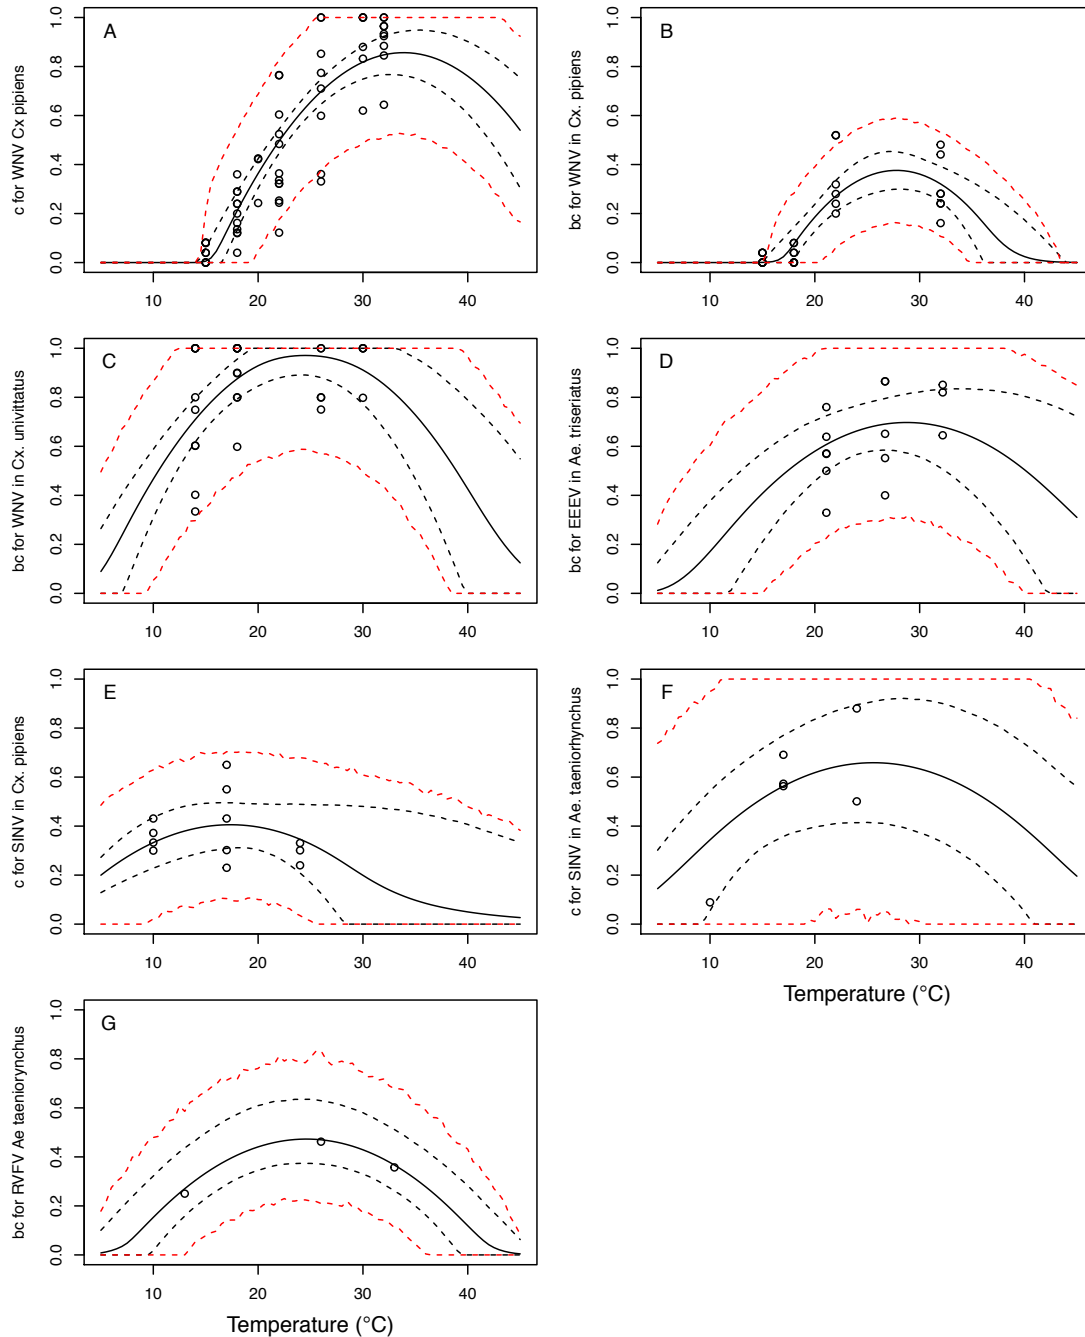

**Figure S10: Medians & 95% credible intervals for thermal limits and optima of  $R_0$  models across temperate and tropical mosquito-borne disease systems.** Models in order from top to bottom: Eastern Equine Encephalitis virus (EEEV) in *Aedes triseriatus* (dark purple; this paper), Western Equine Encephalitis virus (WEEV) in *Culex tarsalis* (light purple; this paper), Sindbis virus (SINV) in *Cx. pipiens* (dark blue; this paper), West Nile virus (WNV) in *Cx. univittatus* (medium blue; this paper), WNV in *Cx. tarsalis* (light blue, this paper), St. Louis Encephalitis virus (SLEV) in *Cx. tarsalis* (dark teal; this paper), WNV in *Cx. pipiens* (light teal; this paper), WNV in *Cx. quinquefasciatus* (dark green; this paper), *Plasmodium falciparum* malaria in *Anopheles* spp. (light green; [3]), Rift Valley Fever virus (RVFV) in *Ae. taeniorhynchus* (yellow; this paper), SINV in *Ae. taeniorhynchus* (light orange; this paper), Ross River virus (RRV) in *Cx. annulirostris* (medium orange, [5]), dengue virus (DENV) in *Ae. albopictus* (dark orange; [4]), Murray Valley Encephalitis virus (MVEV) in *Cx. annulirostris* (light red, [5]), Zika virus (ZIKV) in *Ae. aegypti* (medium red; [6]), DENV in *Ae. aegypti* (dark red; [4]). Figure modified from [53].

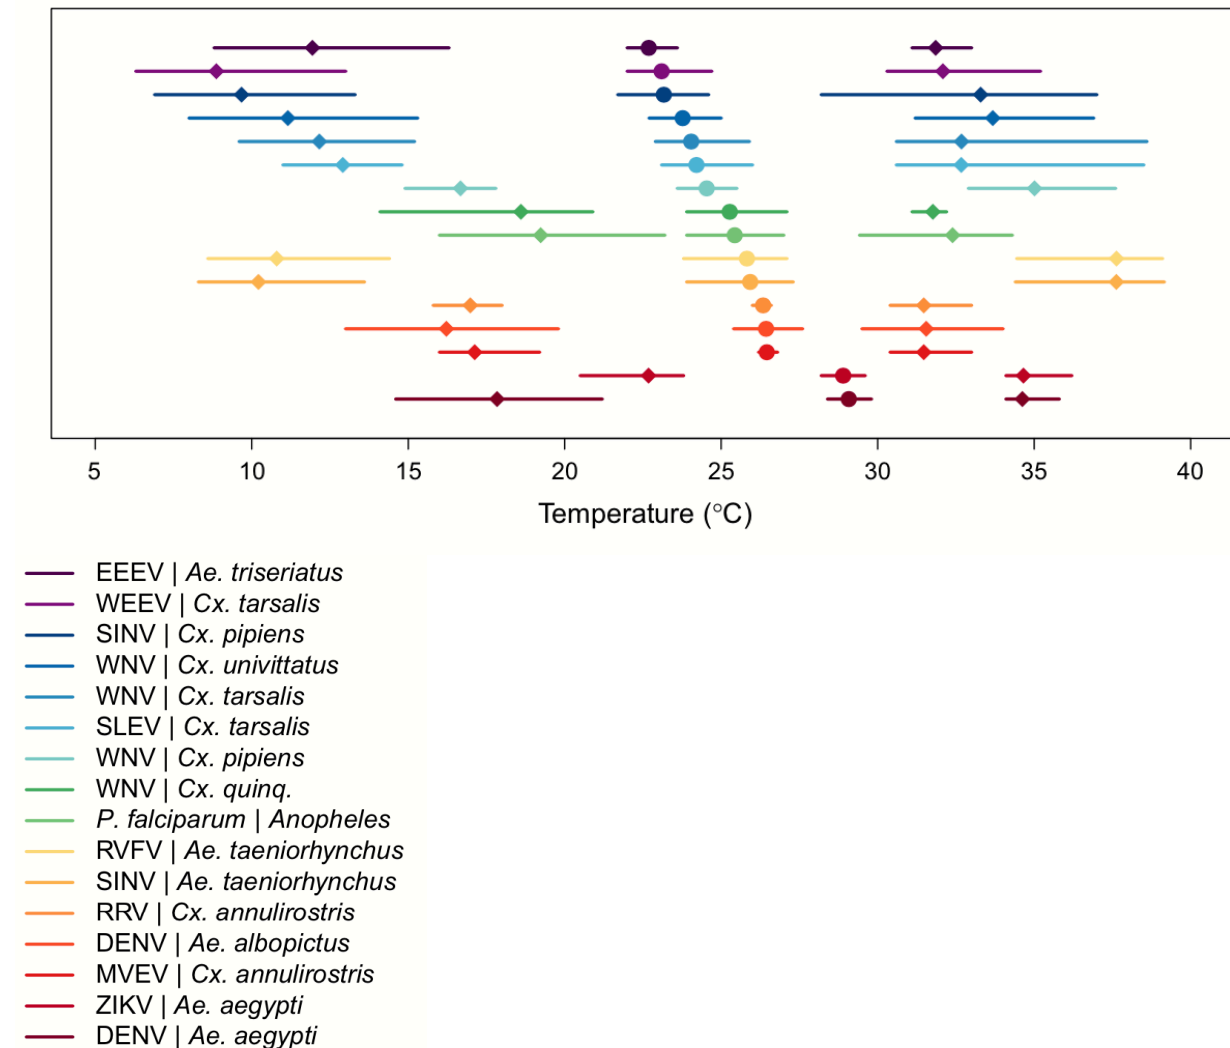

**Figure S11: Temperature-dependent  $R_0$ , sensitivity analyses, and uncertainty analysis for model of West Nile Virus (WNV) in *Culex pipiens*.** (A) Median temperature-dependent  $R_0$  (black line) with 95% credible intervals (dashed red lines). (B) Sensitivity analysis #1: derivative with respect to temperature for  $R_0$  (black) and partial derivatives with respect to temperature for each trait. (C) Sensitivity analysis #2: relative  $R_0$  calculated with single traits held constant. (D) Uncertainty analysis using highest posterior density (HPD) interval widths: the proportion of total uncertainty due to each trait. (B-D) Trait colors: biting rate ( $a$ , red), vector competence ( $bc$ , orange), adult lifespan ( $lf$ , green), parasite development rate ( $PDR$ , cyan), fecundity ( $EFGC$ , light blue), egg viability ( $EV$ , dark blue), larval survival ( $pLA$ , purple), and mosquito development rate ( $MDR$ , pink). All traits from *Cx. pipiens*.

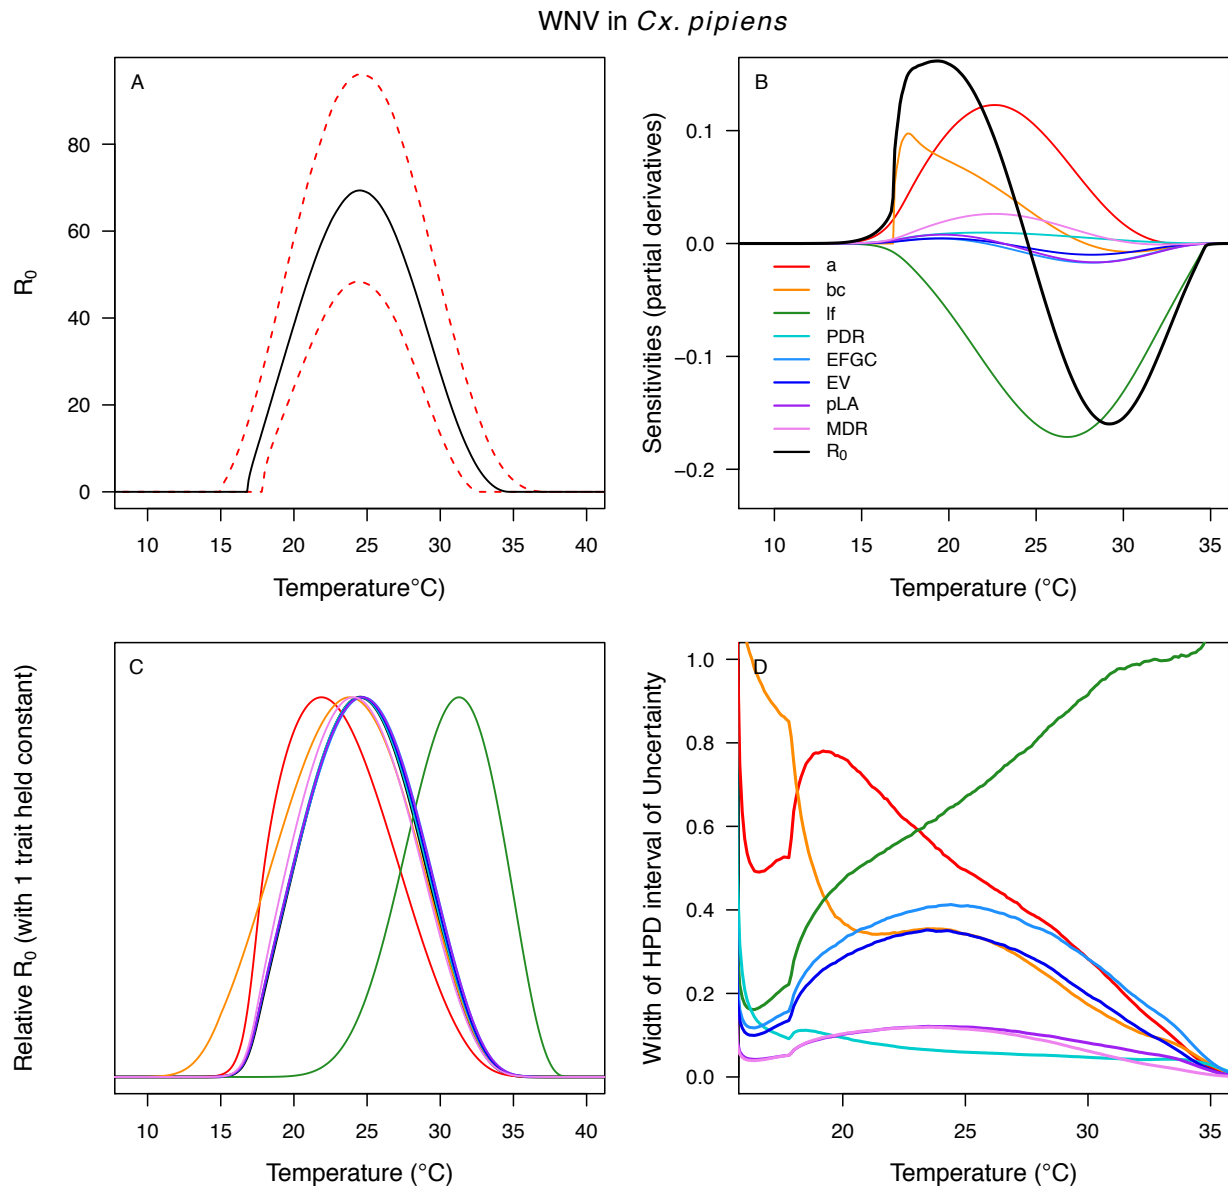

**Figure S12: Temperature-dependent  $R_0$ , sensitivity analyses, and uncertainty analysis for model of West Nile Virus (WNV) in *Culex quinquefasciatus*.** (A) Median temperature-dependent  $R_0$  (black line) with 95% credible intervals (dashed red lines). (B) Sensitivity analysis #1: derivative with respect to temperature for  $R_0$  (black) and partial derivatives with respect to temperature for each trait. (C) Sensitivity analysis #2: relative  $R_0$  calculated with single traits held constant. (D) Uncertainty analysis using highest posterior density (HPD) interval widths: the proportion of total uncertainty due to each trait. (B-D) Trait colors: biting rate ( $a$ , red), vector competence ( $bc$ , orange), adult lifespan ( $lf$ , green), parasite development rate ( $PDR$ , cyan), fecundity ( $EFGC$ , light blue), egg viability ( $EV$ , dark blue), larval survival ( $pLA$ , purple), mosquito development rate ( $MDR$ , pink), and proportion ovipositing ( $pO$ , grey). Vector competence ( $bc$ ) from *Cx. univitattus*; all other traits from *Cx. quinquefasciatus*.

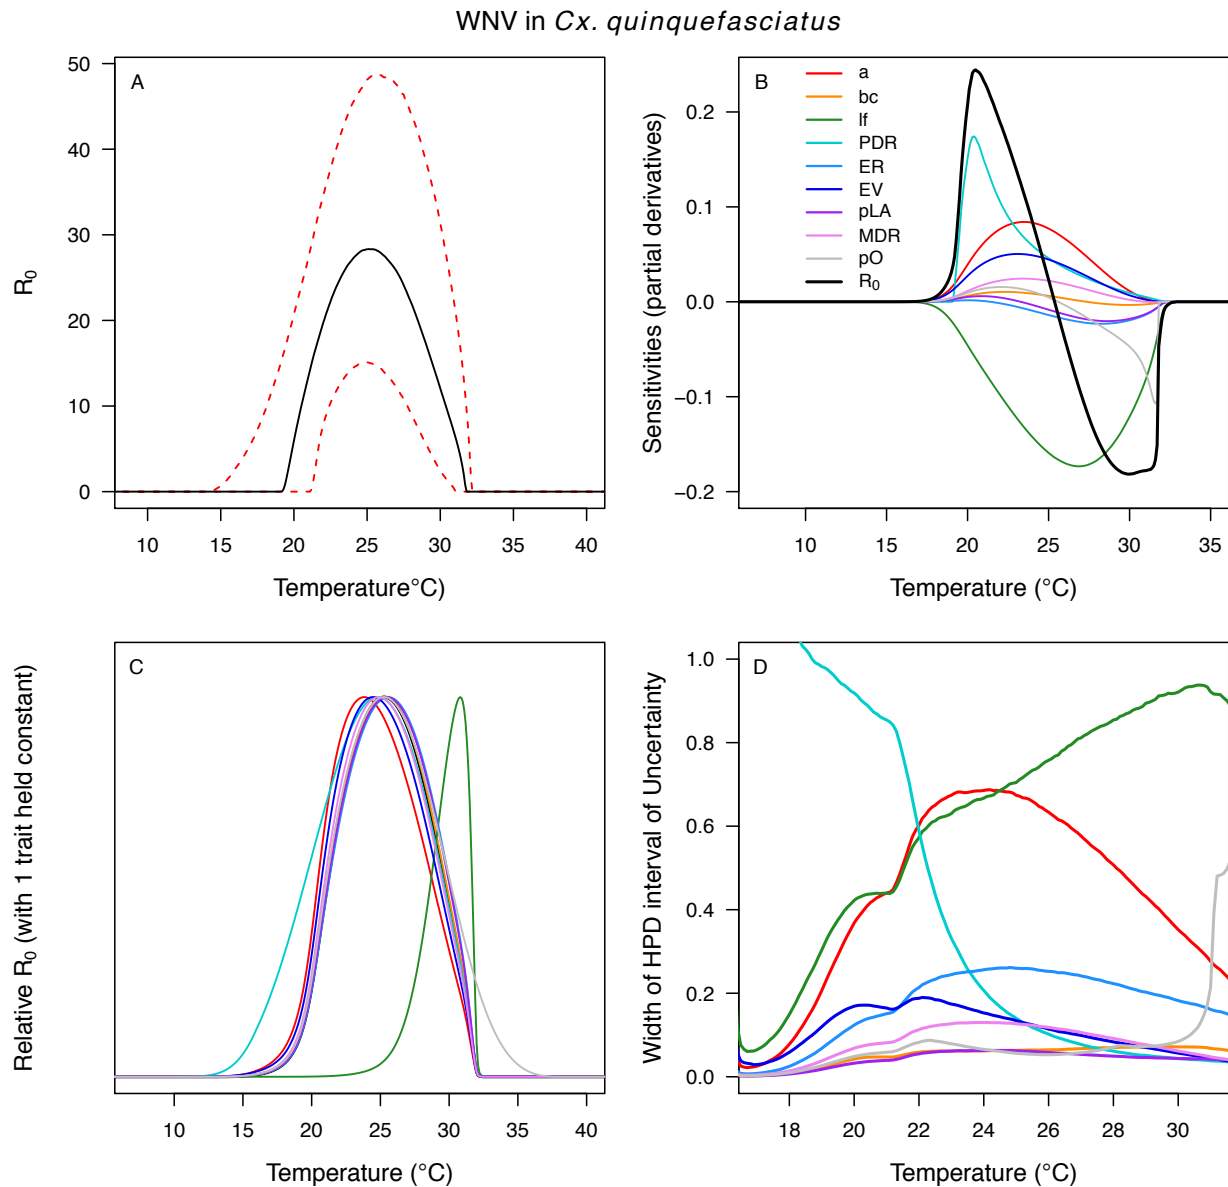

**Figure S13: Temperature-dependent  $R_0$ , sensitivity analyses, and uncertainty analysis for model of West Nile Virus (WNV) in *Culex tarsalis*.** (A) Median temperature-dependent  $R_0$  (black line) with 95% credible intervals (dashed red lines). (B) Sensitivity analysis #1: derivative with respect to temperature for  $R_0$  (black) and partial derivatives with respect to temperature for each trait. (C) Sensitivity analysis #2: relative  $R_0$  calculated with single traits held constant. (D) Uncertainty analysis using highest posterior density (HPD) interval widths: the proportion of total uncertainty due to each trait. (B-D) Trait colors: biting rate ( $a$ , red), transmission efficiency ( $b$ , orange), adult lifespan ( $lf$ , green), parasite development rate ( $PDR$ , cyan), fecundity ( $EFGC$ , light blue), egg viability ( $EV$ , dark blue), larval survival ( $pLA$ , purple), and mosquito development rate ( $MDR$ , pink). Fecundity ( $EFGC$ ) and egg viability ( $EV$ ) from *Cx. pipiens*; all other traits from *Cx. tarsalis*.

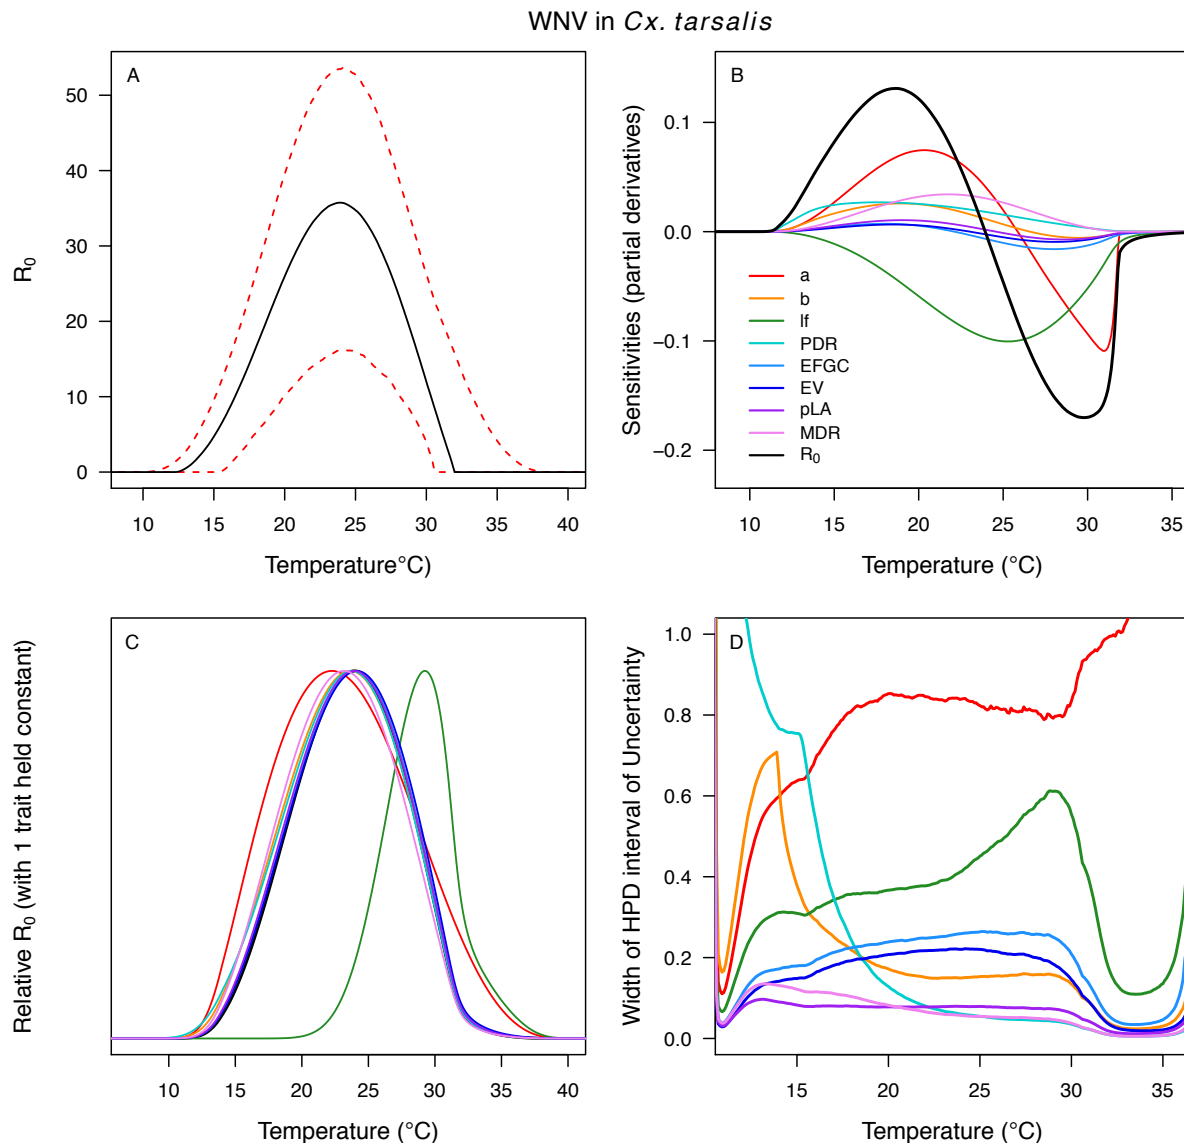

**Figure S14: Temperature-dependent  $R_0$ , sensitivity analyses, and uncertainty analysis for model of West Nile Virus (WNV) in *Culex univittatus*.** (A) Median temperature-dependent  $R_0$  (black line) with 95% credible intervals (dashed red lines). (B) Sensitivity analysis #1: derivative with respect to temperature for  $R_0$  (black) and partial derivatives with respect to temperature for each trait. (C) Sensitivity analysis #2: relative  $R_0$  calculated with single traits held constant. (D) Uncertainty analysis using highest posterior density (HPD) interval widths: the proportion of total uncertainty due to each trait. (B-D) Trait colors: biting rate ( $a$ , red), vector competence ( $bc$ , orange), adult lifespan ( $lf$ , green), parasite development rate ( $PDR$ , cyan), fecundity ( $EFGC$ , light blue), egg viability ( $EV$ , dark blue), larval survival ( $pLA$ , purple), and mosquito development rate ( $MDR$ , pink). Infection traits ( $bc$  and  $PDR$ ) from *Cx. univittatus*; all other traits from *Cx. pipiens*.

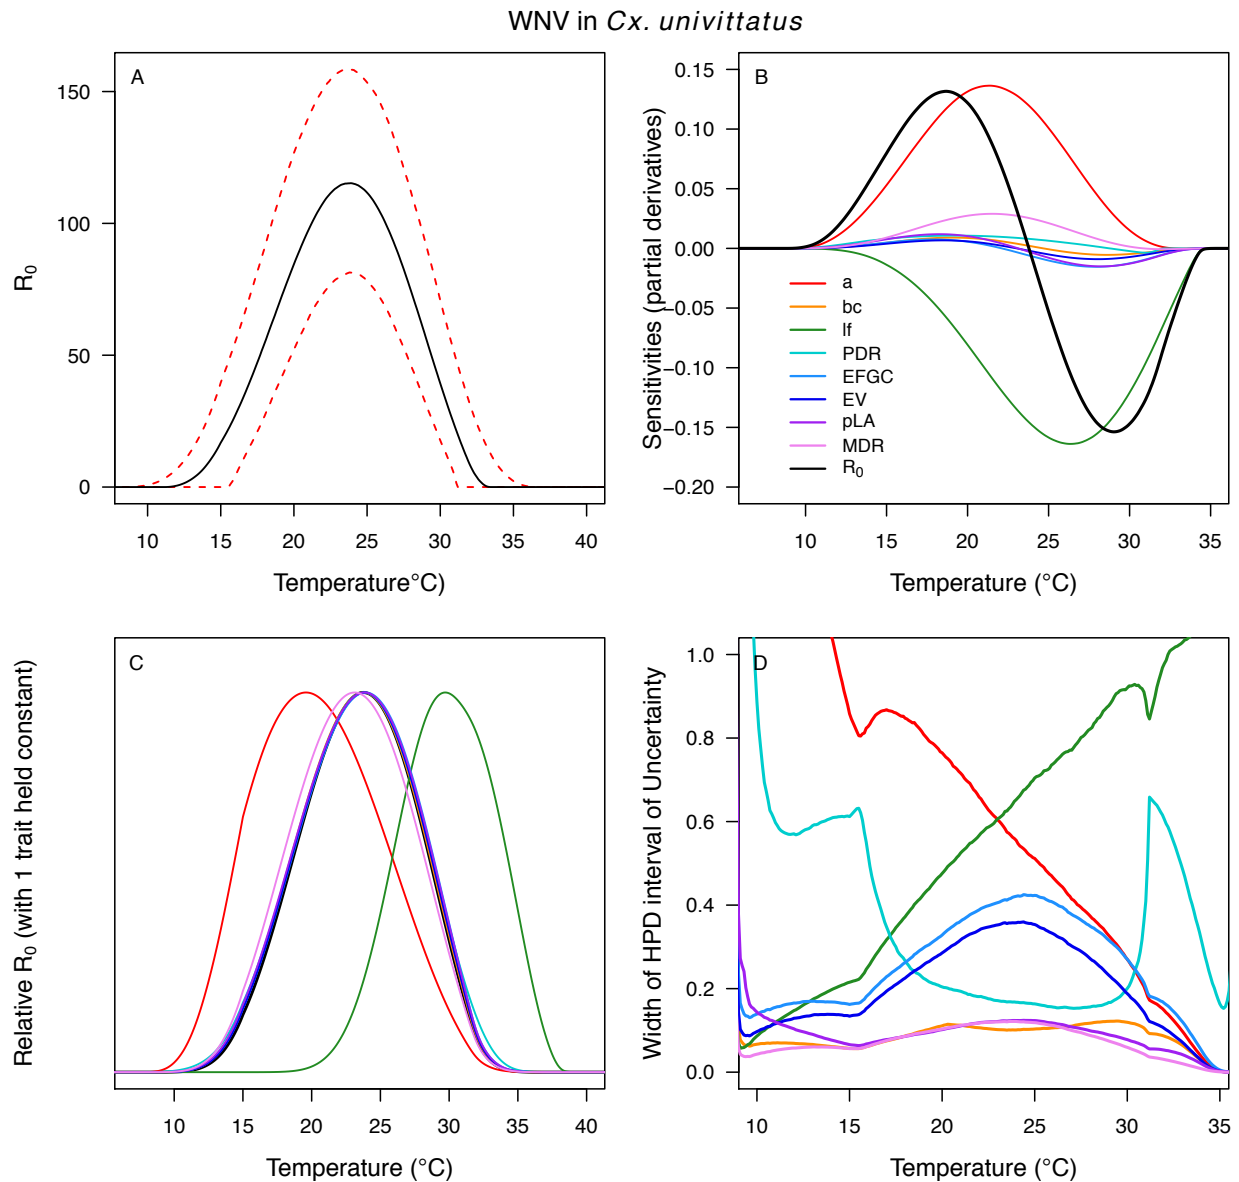

**Figure S15: Temperature-dependent  $R_0$ , sensitivity analyses, and uncertainty analysis for St. model of St. Louis Encephalitis Virus (SLEV) in *Culex tarsalis*.** (A) Median temperature-dependent  $R_0$  (black line) with 95% credible intervals (dashed red lines). (B) Sensitivity analysis #1: derivative with respect to temperature for  $R_0$  (black) and partial derivatives with respect to temperature for each trait. (C) Sensitivity analysis #2: relative  $R_0$  calculated with single traits held constant. (D) Uncertainty analysis using highest posterior density (HPD) interval widths: the proportion of total uncertainty due to each trait. (B-D) Trait colors: biting rate ( $a$ , red), transmission efficiency ( $b$ , orange), infection efficiency ( $c$ , brown), adult lifespan ( $lf$ , green), parasite development rate ( $PDR$ , cyan), fecundity ( $EFGC$ , light blue), egg viability ( $EV$ , dark blue), larval survival ( $pLA$ , purple), and mosquito development rate ( $MDR$ , pink). Fecundity ( $EFGC$ ) and egg viability ( $EV$ ) from *Cx. pipiens*; all other traits from *Cx. tarsalis*.

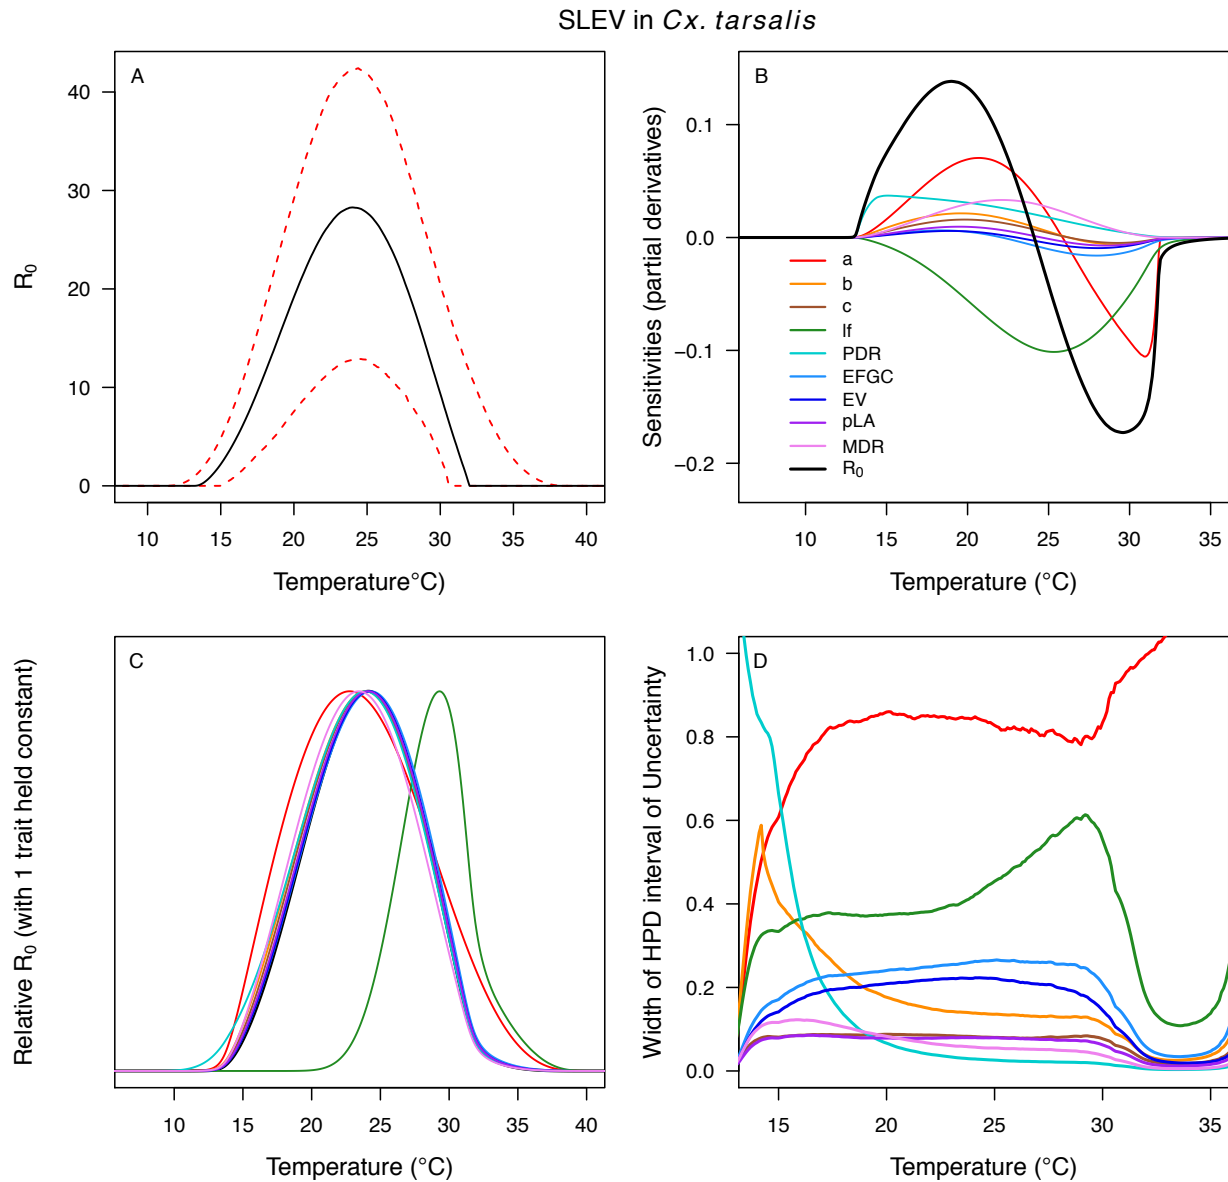

**Figure S16: Temperature-dependent  $R_0$ , sensitivity analyses, and uncertainty analysis for model of Western Equine Encephalitis Virus (WEEV) in *Culex tarsalis*.** (A) Median temperature-dependent  $R_0$  (black line) with 95% credible intervals (dashed red lines). (B) Sensitivity analysis #1: derivative with respect to temperature for  $R_0$  (black) and partial derivatives with respect to temperature for each trait. (C) Sensitivity analysis #2: relative  $R_0$  calculated with single traits held constant. (D) Uncertainty analysis using highest posterior density (HPD) interval widths: the proportion of total uncertainty due to each trait. (B-D) Trait colors: biting rate (*a*, red), transmission efficiency (*b*, orange), infection efficiency (*c*, brown), adult lifespan (*lf*, green), parasite development rate (*PDR*, cyan), fecundity (*EFGC*, light blue), egg viability (*EV*, dark blue), larval survival (*pLA*, purple), and mosquito development rate (*MDR*, pink). Fecundity (*EFGC*) and egg viability (*EV*) from *Cx. pipiens*; all other traits from *Cx. tarsalis*.

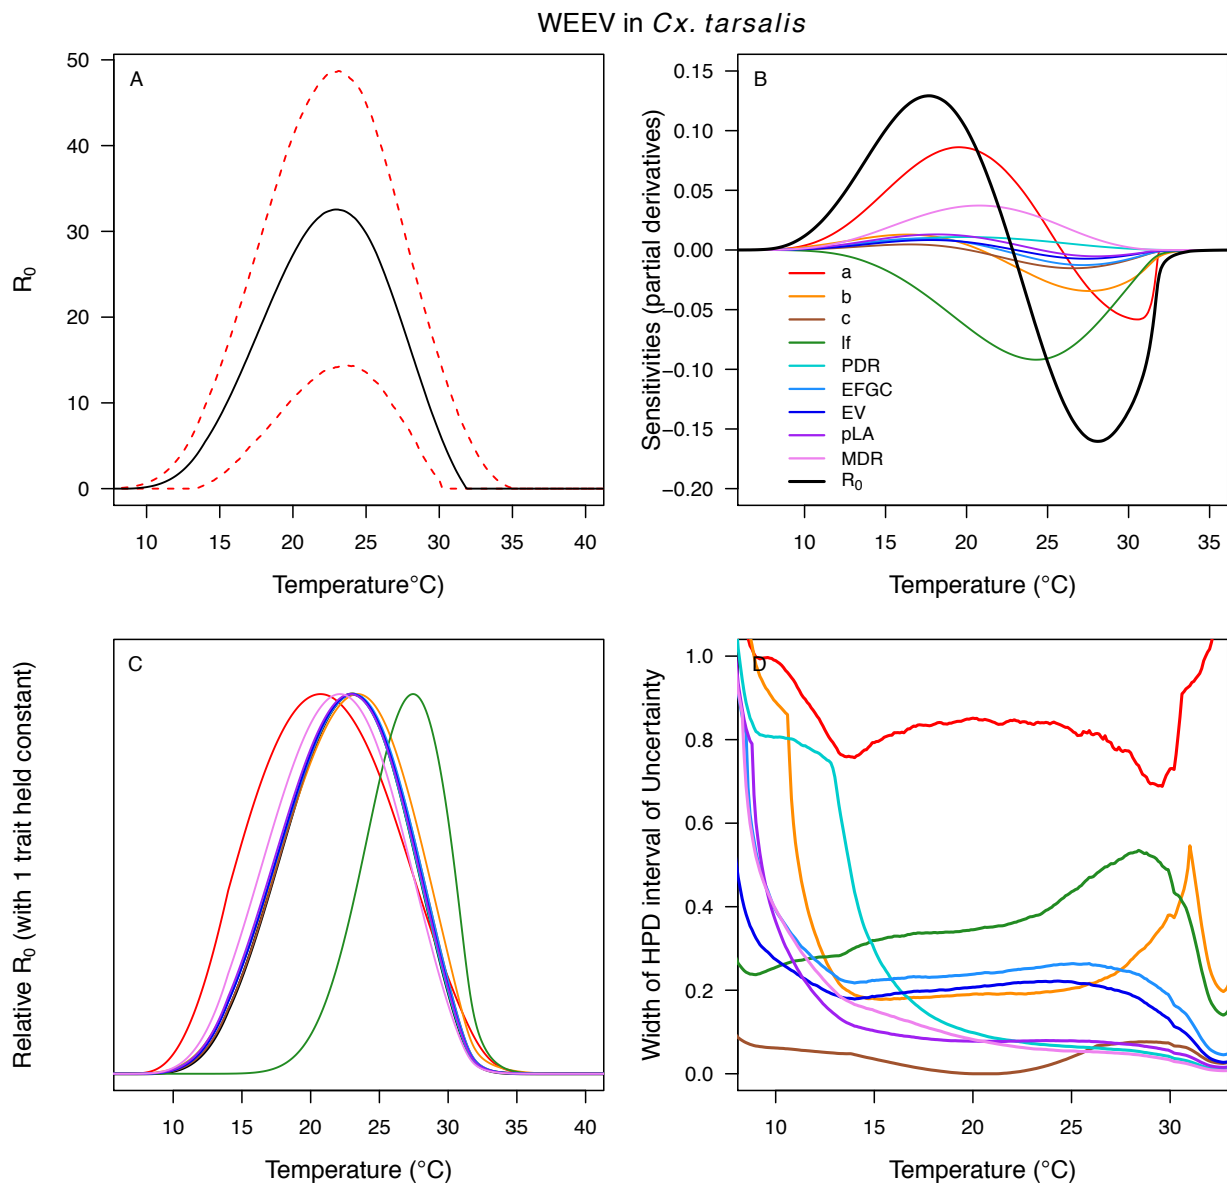



**Figure S17: Temperature-dependent  $R_0$ , sensitivity analyses, and uncertainty analysis for model of Eastern Equine Encephalitis Virus in *Aedes triseriatus*.** (A) Median temperature-dependent  $R_0$  (black line) with 95% credible intervals (dashed red lines). (B) Sensitivity analysis #1: derivative with respect to temperature for  $R_0$  (black) and partial derivatives with respect to temperature for each trait. (C) Sensitivity analysis #2: relative  $R_0$  calculated with single traits held constant. (D) Uncertainty analysis using highest posterior density (HPD) interval widths: the proportion of total uncertainty due to each trait. (B-D) Trait colors: biting rate ( $a$ , red), vector competence ( $bc$ , orange), adult lifespan ( $lf$ , green), parasite development rate ( $PDR$ , cyan), fecundity ( $EFGC$ , light blue), egg viability ( $EV$ , dark blue), larval survival ( $pLA$ , purple), mosquito development rate ( $MDR$ , pink), and proportion ovipositing ( $pO$ , grey). Fecundity ( $EFGC$ ), egg viability ( $EV$ ), and lifespan ( $lf$ ) from *Cx. pipiens*; biting rate ( $a$ ) and proportion ovipositing ( $pO$ ) from *Culiseta melanura*; all other traits from *Ae. triseriatus*. Note: technically fecundity as eggs per female per gonotrophic cycle ( $EFGC$ ) has already accounted for the proportion ovipositing ( $pO$ ). However, we selected this trait fit because it was very similar to the  $ER$  thermal response from *Cx. quinquefasciatus*, but slightly wider (more conservative).

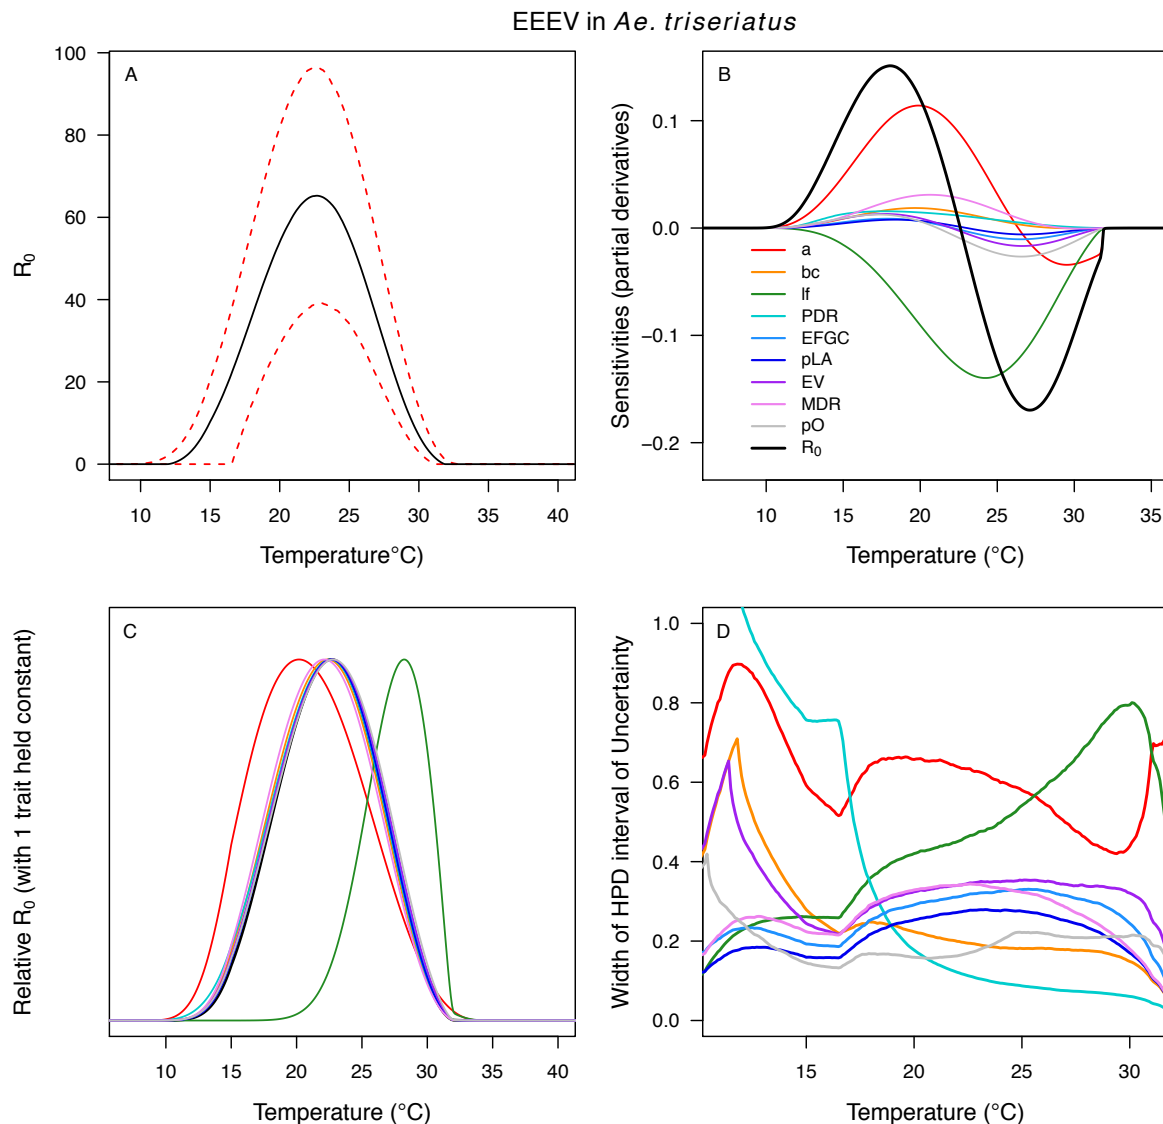

**Figure S18: Temperature-dependent  $R_0$ , sensitivity analyses, and uncertainty analysis for model of Sindbis Virus in *Culex pipiens*.** (A) Median temperature-dependent  $R_0$  (black line) with 95% credible intervals (dashed red lines). (B) Sensitivity analysis #1: derivative with respect to temperature for  $R_0$  (black) and partial derivatives with respect to temperature for each trait. (C) Sensitivity analysis #2: relative  $R_0$  calculated with single traits held constant. (D) Uncertainty analysis using highest posterior density (HPD) interval widths: the proportion of total uncertainty due to each trait. (B-D) Trait colors: biting rate ( $a$ , red), infection efficiency ( $c$ , brown), adult lifespan ( $lf$ , green), fecundity ( $EFGC$ , light blue), egg viability ( $EV$ , dark blue), larval survival ( $pLA$ , purple), and mosquito development rate ( $MDR$ , pink). All traits from *Cx. pipiens*. NOTE: The raw  $R_0$  calculation used  $PDR = 1$ , which is not biologically reasonable trait value.

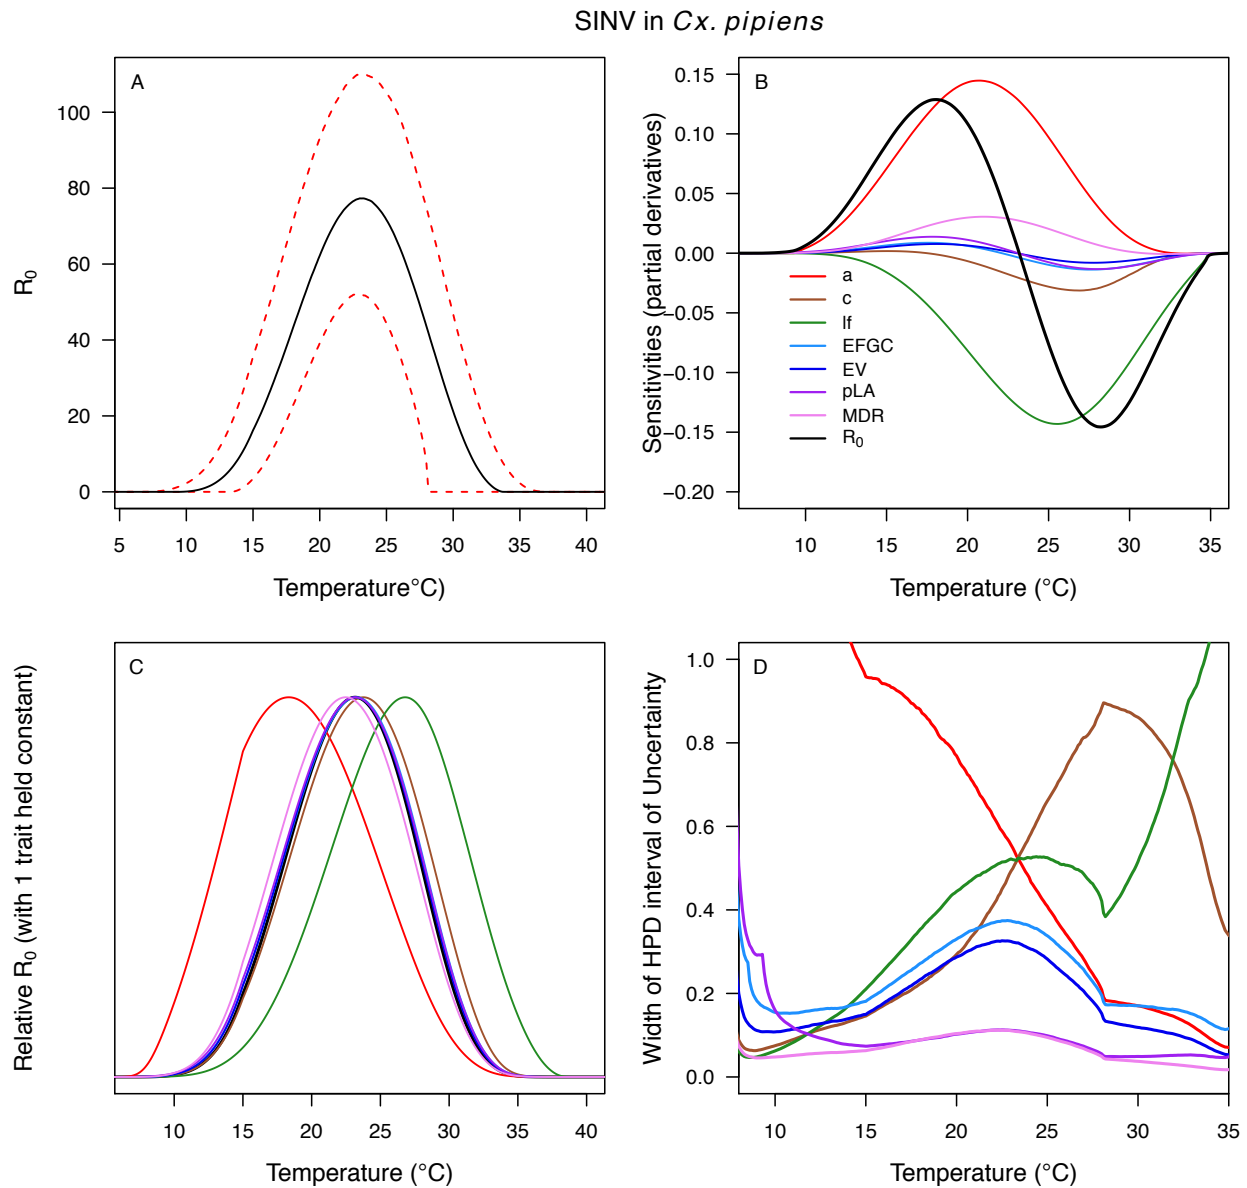

**Figure S19: Temperature-dependent  $R_0$ , sensitivity analyses, and uncertainty analysis for model of Sindbis Virus in *Aedes taeniorhynchus*.** (A) Median temperature-dependent  $R_0$  (black line) with 95% credible intervals (dashed red lines). (B) Sensitivity analysis #1: derivative with respect to temperature for  $R_0$  (black) and partial derivatives with respect to temperature for each trait. (C) Sensitivity analysis #2: relative  $R_0$  calculated with single traits held constant. (D) Uncertainty analysis using highest posterior density (HPD) interval widths: the proportion of total uncertainty due to each trait. (B-D) Trait colors: biting rate ( $a$ , red), infection efficiency ( $c$ , brown), adult lifespan ( $lf$ , green), fecundity ( $EFGC$ , light blue), egg viability ( $EV$ , dark blue), larval survival ( $pLA$ , purple), and mosquito development rate ( $MDR$ , pink). Fecundity ( $EFGC$ ) and biting rate ( $a$ ) from *Culex pipiens*; egg viability ( $EV$ ) and larval traits ( $pLA$  and  $MDR$ ) from *Ae. vexans*; all other traits from *Ae. taeniorhynchus*. NOTE: The raw  $R_0$  calculation used  $PDR = 1$ , which is not biologically reasonable trait value.

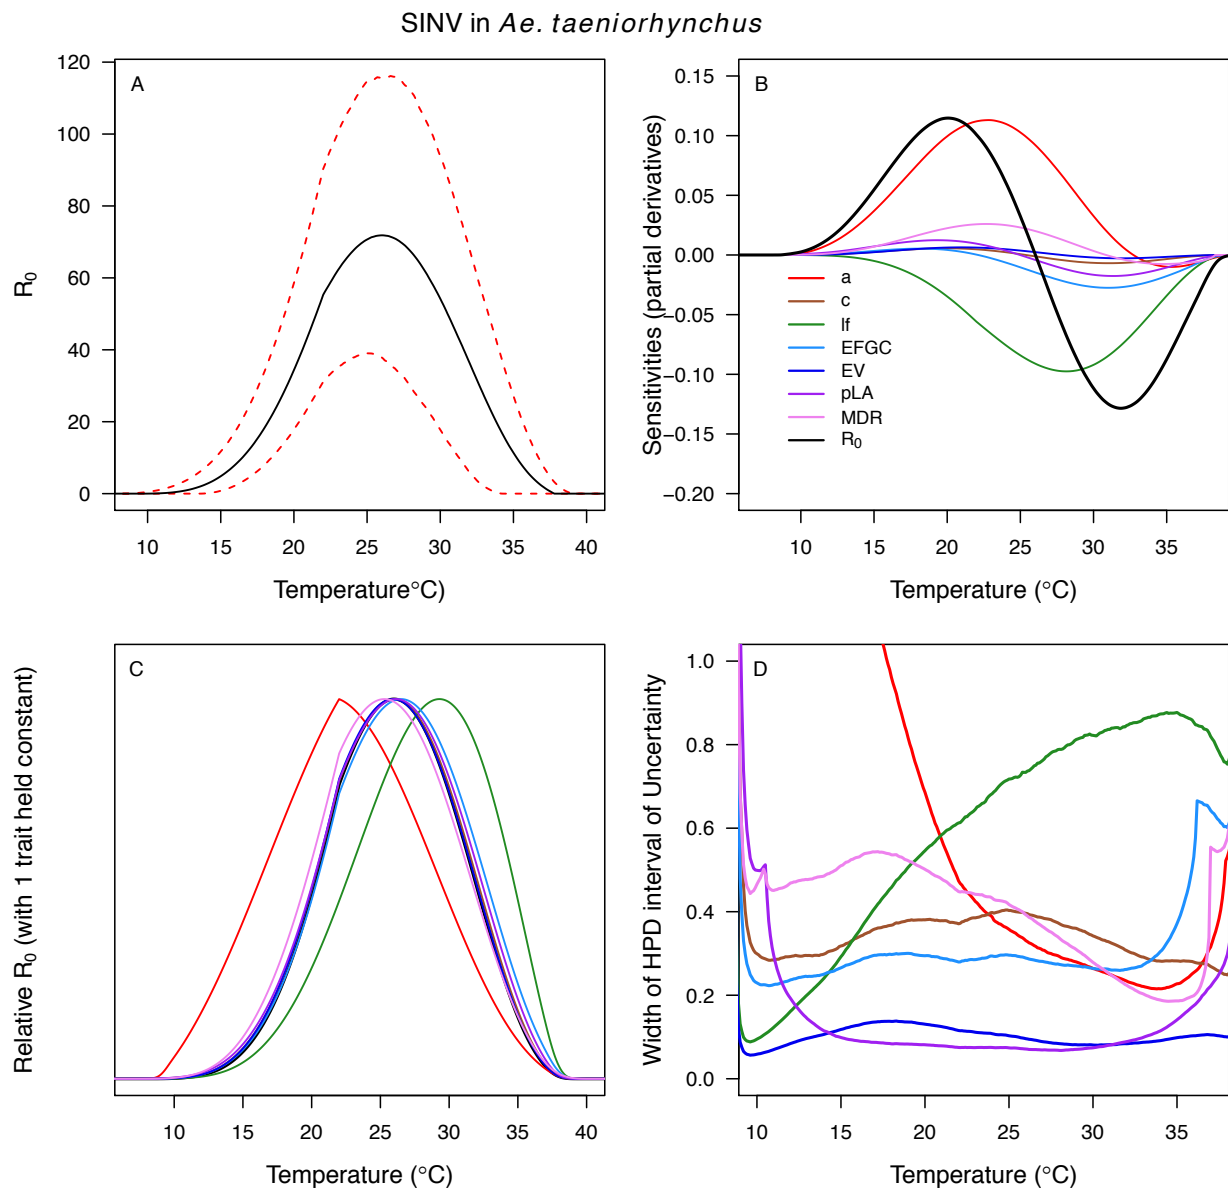

**Figure S20: Temperature-dependent  $R_0$ , sensitivity analyses, and uncertainty analysis for model of Rift Valley Fever Virus in *Aedes taeniorhynchus*.** (A) Median temperature-dependent  $R_0$  (black line) with 95% credible intervals (dashed red lines). (B) Sensitivity analysis #1: derivative with respect to temperature for  $R_0$  (black) and partial derivatives with respect to temperature for each trait. (C) Sensitivity analysis #2: relative  $R_0$  calculated with single traits held constant. (D) Uncertainty analysis using highest posterior density (HPD) interval widths: the proportion of total uncertainty due to each trait. (B-D) Trait colors: biting rate ( $a$ , red), vector competence ( $bc$ , orange), adult lifespan ( $lf$ , green), parasite development rate ( $PDR$ , cyan), fecundity ( $EFGC$ , light blue), egg viability ( $EV$ , dark blue), larval survival ( $pLA$ , purple), and mosquito development rate ( $MDR$ , pink). Fecundity ( $EFGC$ ) and biting rate ( $a$ ) from *Culex pipiens*; egg viability ( $EV$ ) from *Cx. theileri*; larval traits ( $pLA$  and  $MDR$ ) from *Ae. vexans*; all other traits from *Ae. taeniorhynchus*.

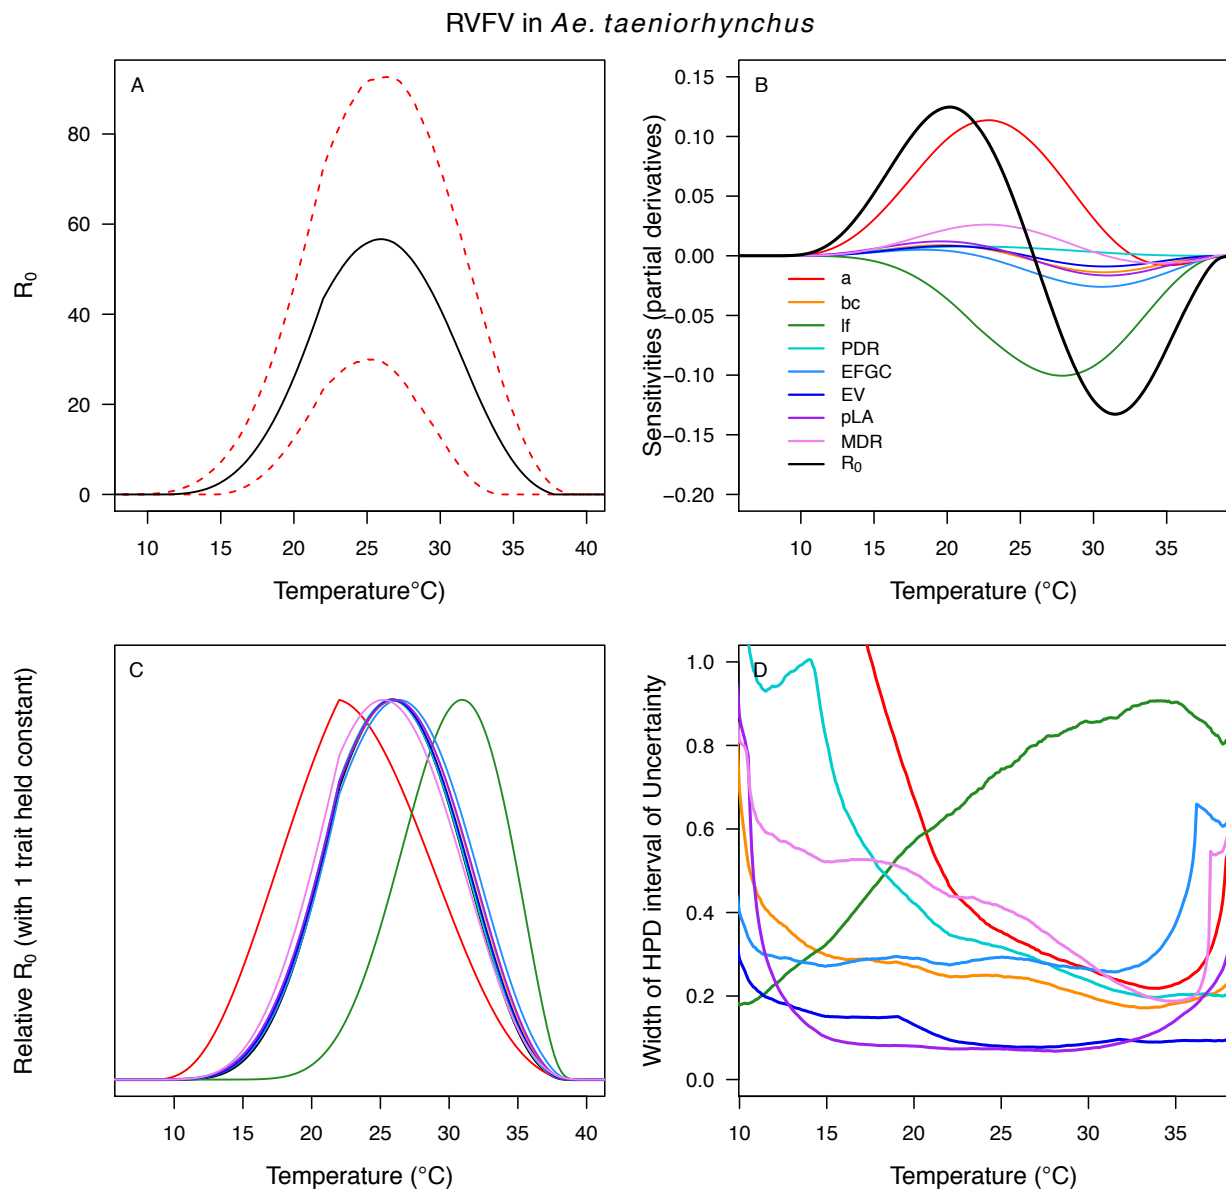

**Figure S21: Histograms of  $T_{min}$ , optimum, and  $T_{max}$  for transmission ( $R_0$ ) models.**  $T_{min}$  (left column), optimum (center column), and  $T_{max}$  (right column). Top row (A-C): West Nile virus (WNV) in four vectors: *Culex pipiens* (grey), *Cx. quinquefasciatus* (red), *Cx. tarsalis* (blue), and *Cx. univittatus* (orange). Middle row (D-F): three viruses in *Cx. tarsalis*: WNV (same as in top row, bright blue), Western Equine Encephalitis virus (WEEV, light blue), and St. Louis Encephalitis virus (SLEV, dark blue). Bottom row (H-J): Sindbis virus (SINV) in *Aedes taeniorhynchus* (grey), SINV in *Cx. pipiens* (dark green), Rift Valley Fever virus (RVFV) in *Ae. taeniorhynchus* (light green), and Eastern Equine Encephalitis virus (EEEV) in *Ae. triseriatus* (purple).

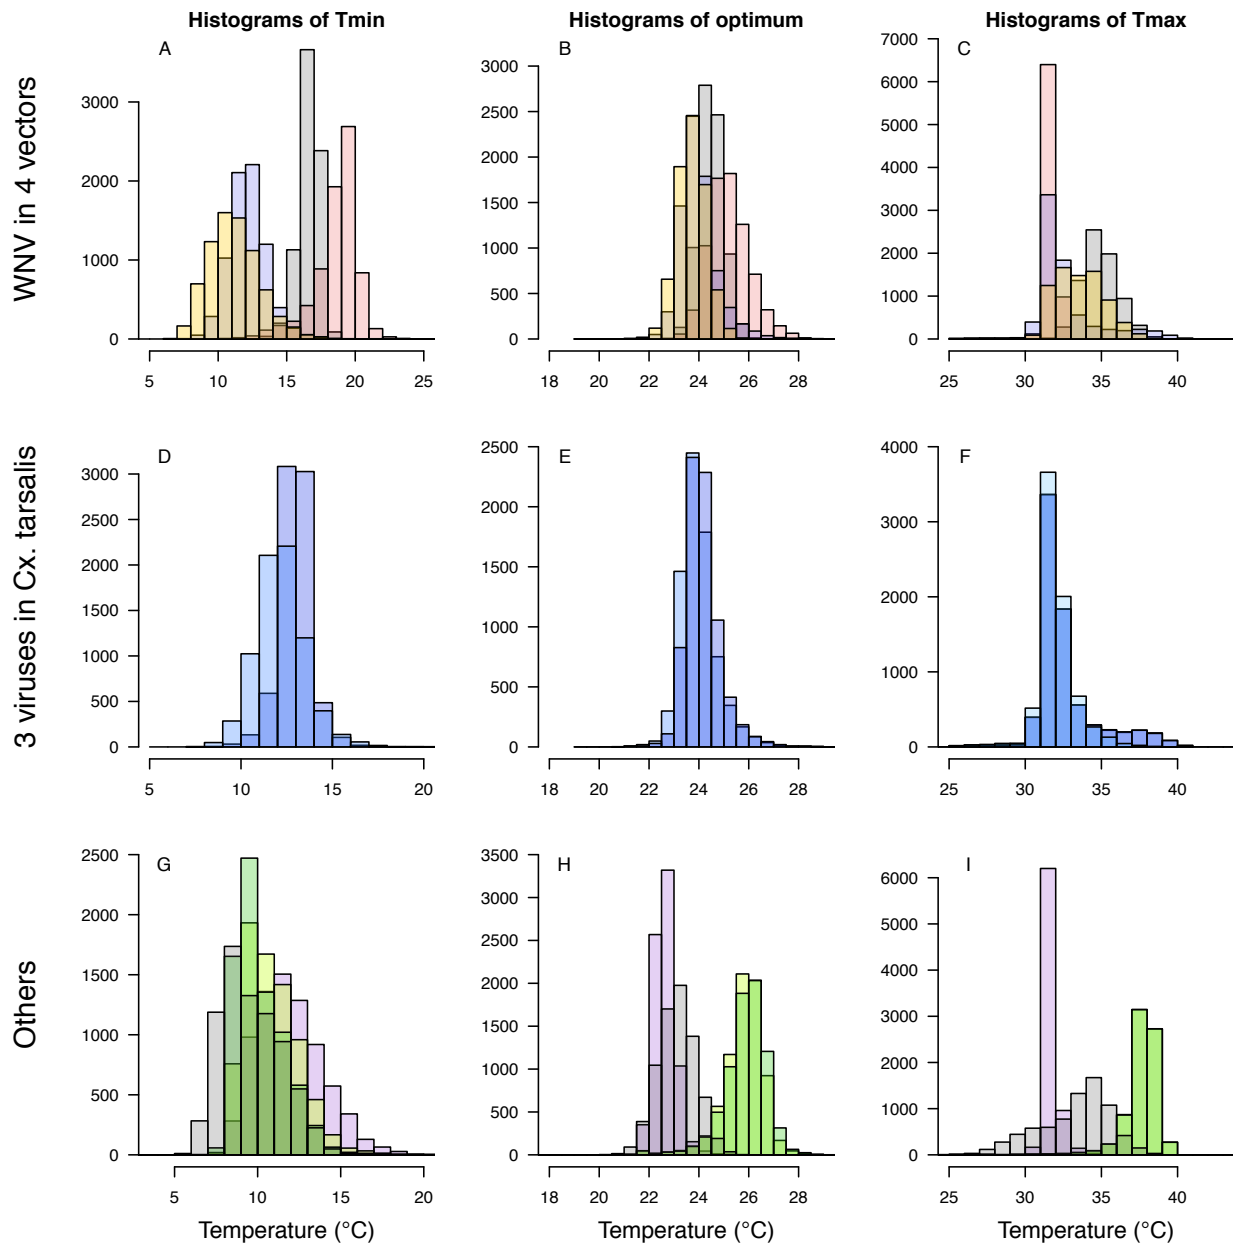

**Figure S22: Comparing alternative model parameterizations.** Several models had multiple potentially valid choices for traits; we show these alternative models here (dashed lines; base models from main text in solid lines) to show that they make very little difference, except in D. (A) Models for EEEV in *Ae. triseriatus* with larval traits (larval-to-adult survival [ $pLA$ ] and mosquito development rate [ $MDR$ ]) from *Ae. triseriatus* (violet, from the main text) and larval traits from *Cs. melanura* (black). We also show larval traits from *Cs. melanura* without proportion ovipositing ( $pO$ ) in the model (grey), since the thermal responses for  $EF_{CG}$  (eggs per female per gonotrophic cycle, in *Cx. pipiens*) and  $ER$  (eggs per raft, in *Cx. quinquefasciatus*) were nearly identical even though the units were different, probably because the  $ER$  data were not very informative and the priors strongly shaped the thermal response. (B) Models for WNV in *Cx. quinquefasciatus*, with (light red, from the main text) and without (dark red) the thermal response for fecundity (as eggs per raft,  $ER$ ), for the same reason as in A. (C) Models for WEEV in *Cx. tarsalis* with vector competence estimated by infection efficiency ( $c$ , Fig 6D) and transmission efficiency ( $b$ , Fig 6E) measured separately (blue, from the main text) or by vector competence measured as a single trait ( $bc$ , Fig 6F; light blue). (D) Models for RVFV in *Ae. taeniorhynchus* with lifespan from *Ae. taeniorhynchus* (light green, from the main text) or from *Cx. pipiens* (dark green). We chose the *Ae. taeniorhynchus* version for the main text because it is the same species the infection traits ( $PDR$ ,  $bc$ ) were measured in, and that choice strongly impacted the results.

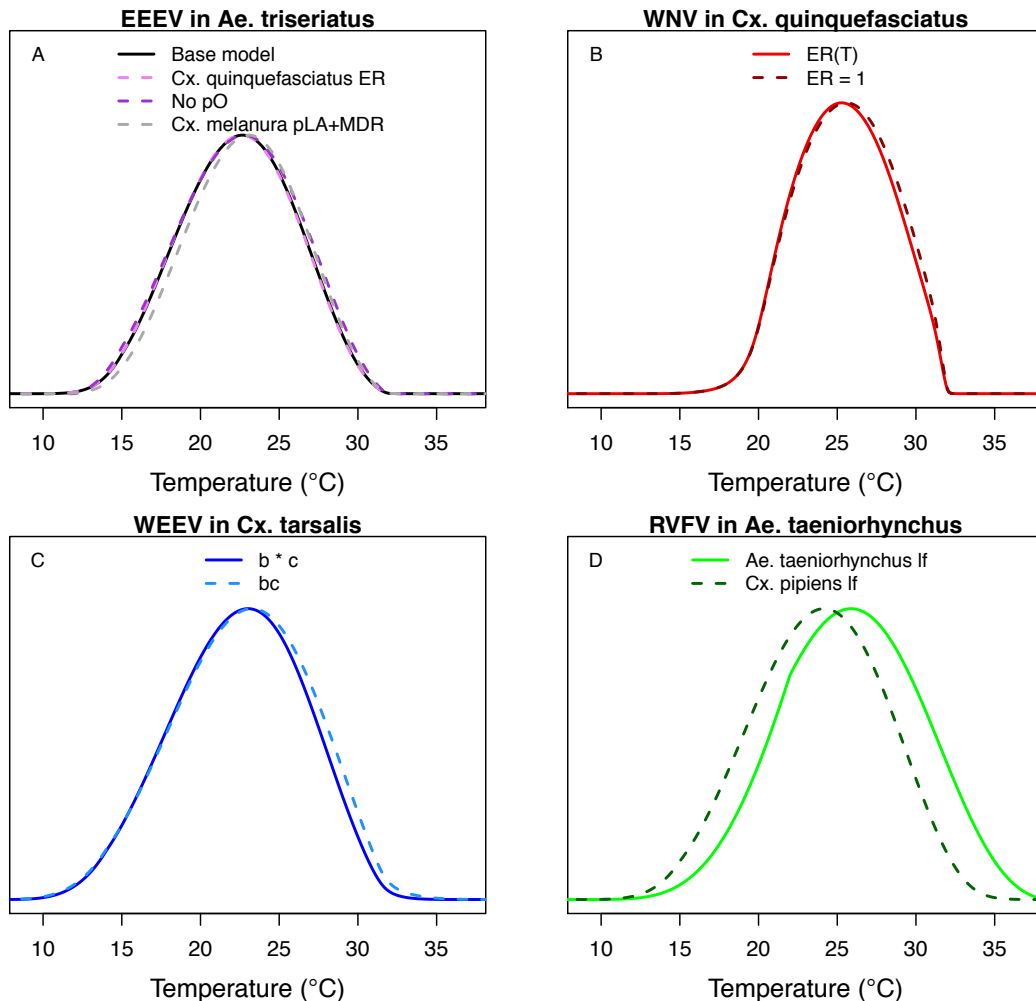

**Figure S23: Comparison with previous  $R_0$  models for transmission of West Nile virus.**

Models taken from this paper (solid lines: *Cx. pipiens* [grey], *Cx. quinquefasciatus* [red], *Cx. tarsalis* [blue], and *Cx. univittatus* [orange]), from Paull et al. 2017 [50] (dashed lines: *Cx. pipiens* [grey], *Cx. quinquefasciatus* [red], and *Cx. tarsalis* [blue]), from Vogels et al. 2017 [54] (*Cx. pipiens* [grey] and *Cx. pipiens molestus* [black]), and from Kushmaro et al. 2015 [55] (not species specific, dot-dashed line [brown]).

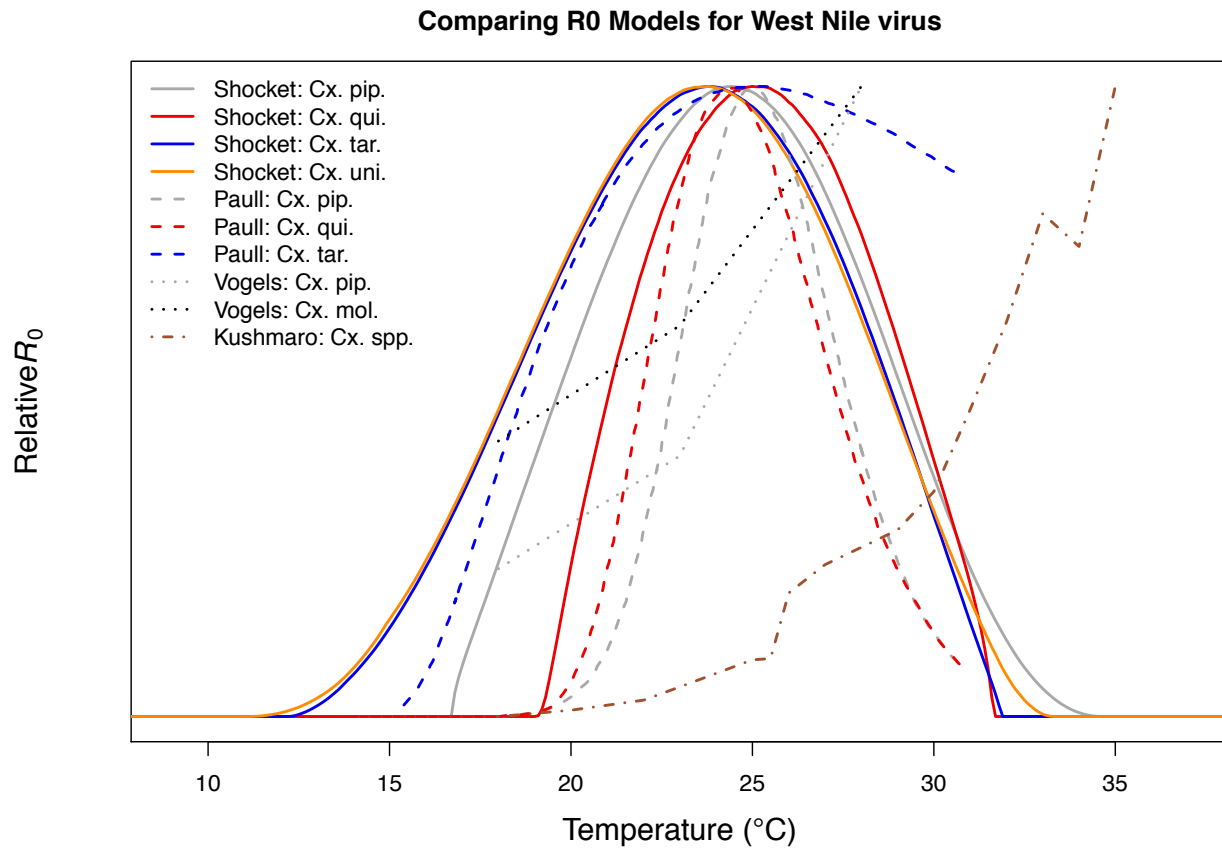

**Figure S24: GAM models of mean WNV incidence as a function of average summer temperature.** (A-F) Models are fit with differing numbers of knots (4–9). In all models, incidence peaks around 24°C ( $T_{opt} = 23.5\text{--}24.2^\circ\text{C}$ ).

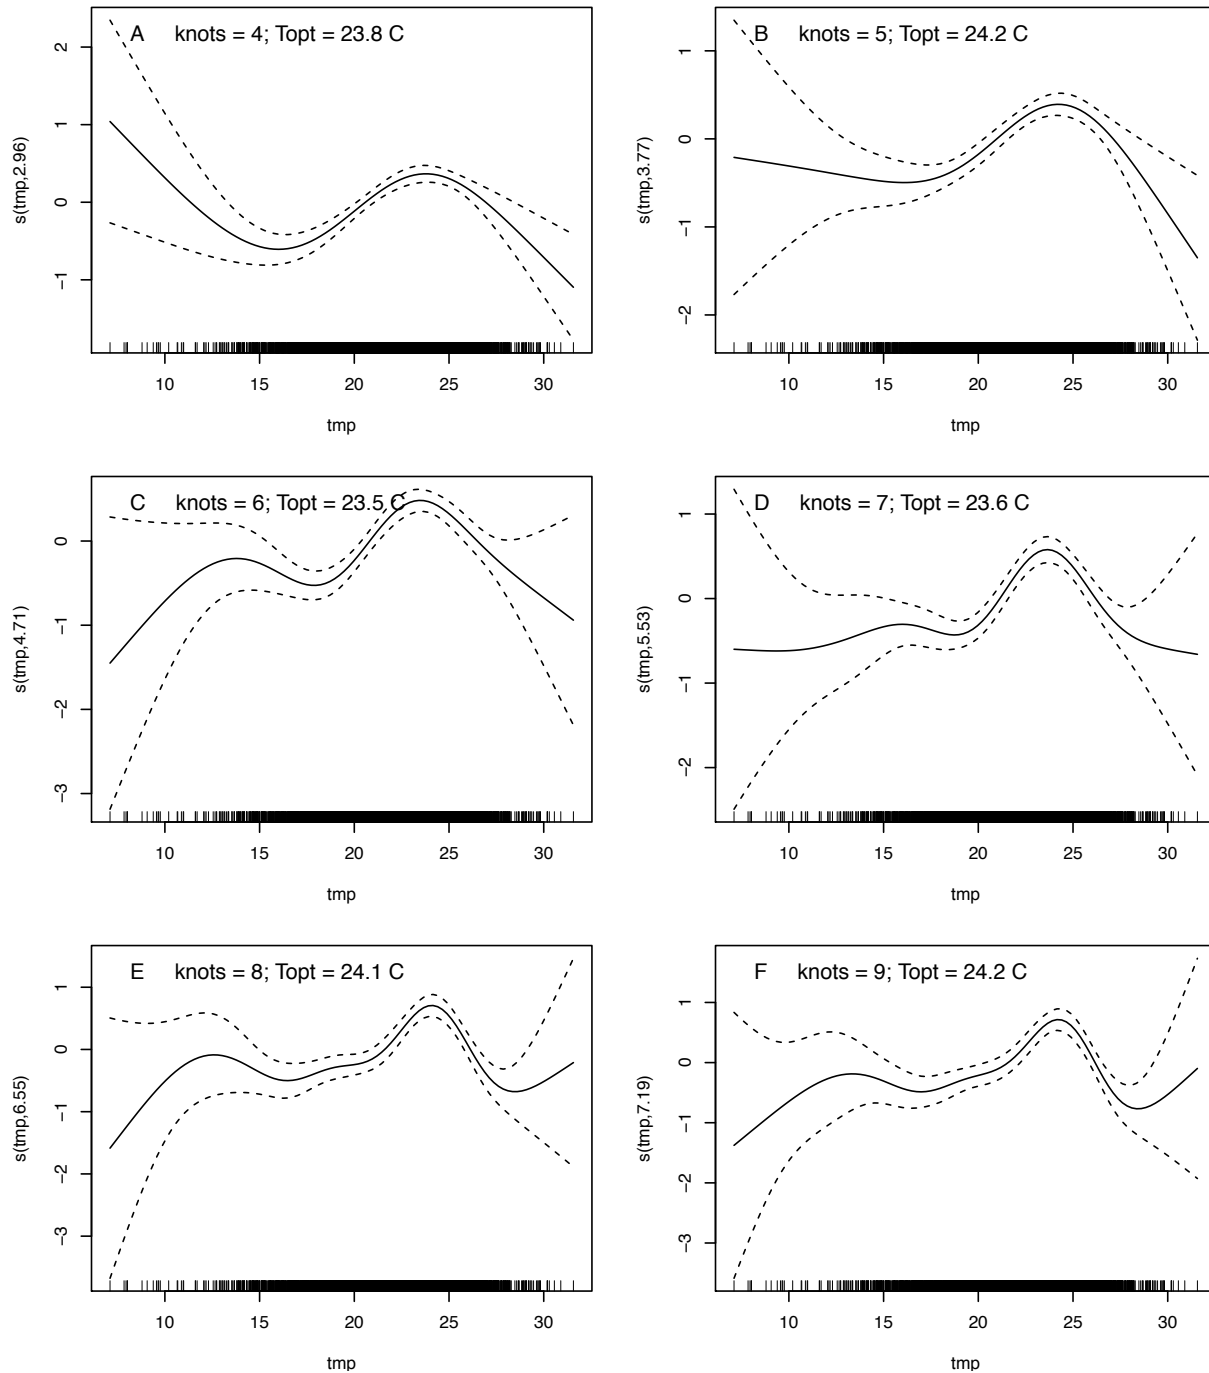



**Table S10: GAM models of mean WNV incidence as a function of average summer temperature.** Statistics for models fit with differing numbers of knots: edf (estimated degrees of freedom), Ref-df,  $F$ , and  $p$ -value refer to the smoothed temperature term (see Fig S24 for plots). Dev. exp. = percent deviance explained.  $T_{opt}$  = temperature of peak incidence.

| Panel in Fig S24 | # knots | edf  | Ref-df | $F$   | $p$ -value            | Adj. $R^2$ | Dev. exp. (%) | $T_{opt}$ |
|------------------|---------|------|--------|-------|-----------------------|------------|---------------|-----------|
| A                | k = 4   | 2.96 | 2.99   | 15.87 | $4.03 \cdot 10^{-10}$ | 0.018      | 2.33          | 23.8°C    |
| B                | k = 5   | 3.77 | 3.97   | 11.11 | $4.64 \cdot 10^{-9}$  | 0.019      | 2.44          | 24.2°C    |
| C                | k = 6   | 4.71 | 4.96   | 11.97 | $4.77 \cdot 10^{-11}$ | 0.022      | 2.85          | 23.5°C    |
| D                | k = 7   | 5.53 | 5.92   | 11.01 | $1.31 \cdot 10^{-11}$ | 0.024      | 3.11          | 23.6°C    |
| E                | k = 8   | 6.55 | 6.93   | 11.12 | $2.73 \cdot 10^{-13}$ | 0.026      | 3.62          | 24.1°C    |
| F                | k = 9   | 7.19 | 7.80   | 10.06 | $3.17 \cdot 10^{-13}$ | 0.026      | 3.67          | 24.2°C    |

**Figure S25: LOESS models of mean WNV incidence as a function of average summer temperature.** Points are means for bins of 42 counties (+/- SE). Lines are locally estimated scatterplot smoothing (LOESS) regression models with different smoothing (span) parameters: 0.1 (red), 0.25 (orange), 0.5 (green), 0.6 (cyan), 0.75 (light blue), 1 (dark blue), and 2 (violet). Models were fit to raw county-level data (n = 3,109, binned for visual clarity). The best model (span = 0.6, which appropriately balances overfitting and underfitting the data) estimates that incidence peaks at 23.9°C.

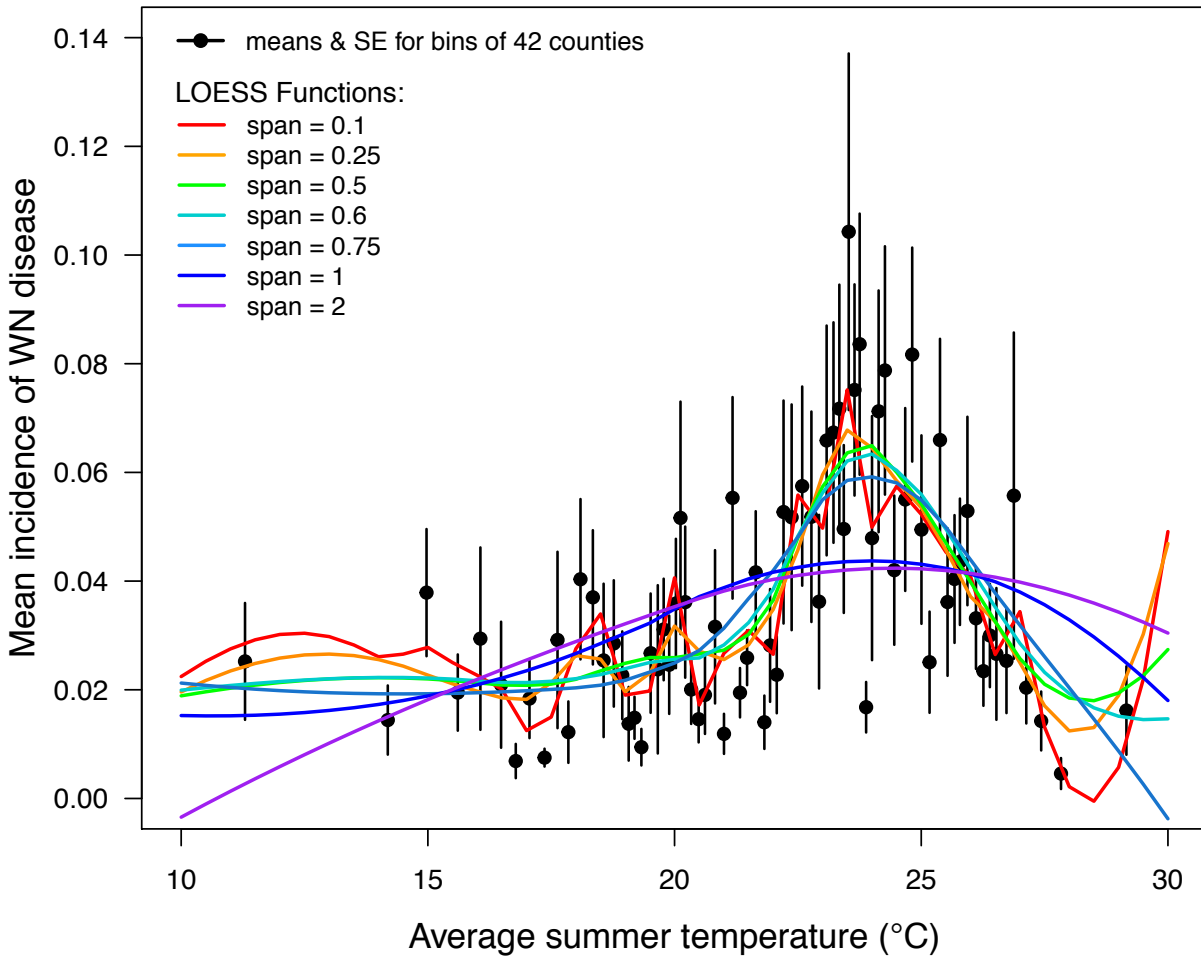

**Figure S26: Raw county-level data for mean WNV incidence (2000-2016) as a function of average summer temperature (n = 3,109).**

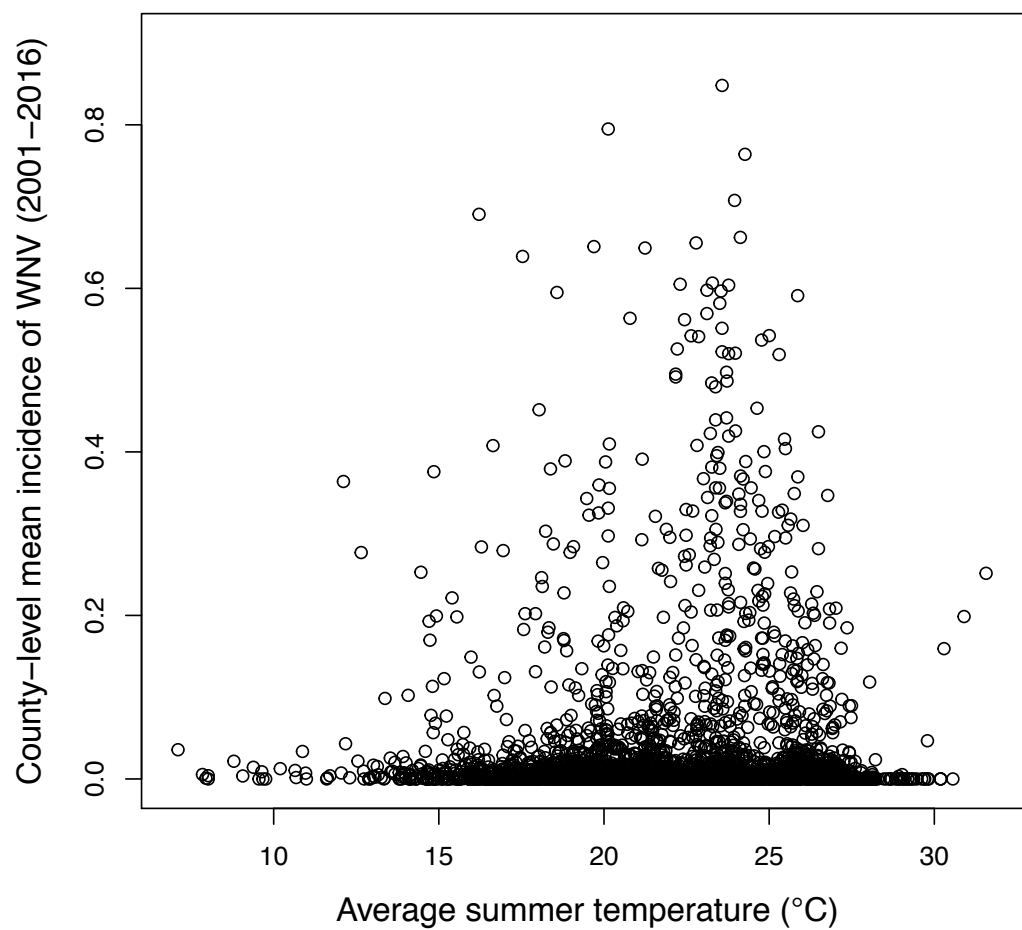

## References

1. Parham PE, Michael E. Modeling the effects of weather and climate change on malaria transmission. *Environmental Health Perspectives*. 2010;118: 620–626. doi:10.1289/ehp.0901256
2. Mordecai EA, Paaijmans KP, Johnson LR, Balzer C, Ben-Horin T, de Moor E, et al. Optimal temperature for malaria transmission is dramatically lower than previously predicted. *Ecology letters*. 2013;16: 22–30. doi:10.1111/ele.12015
3. Johnson LR, Ben-Horin T, Lafferty KD, McNally A, Mordecai E, Paaijmans KP, et al. Understanding uncertainty in temperature effects on vector-borne disease: A Bayesian approach. *Ecology*. 2015;96: 203–213. doi:10.1890/13-1964.1
4. Mordecai EA, Cohen JM, Evans MV, Gudapati P, Johnson LR, Lippi CA, et al. Detecting the impact of temperature on transmission of Zika, dengue, and chikungunya using mechanistic models. *PLOS Neglected Tropical Diseases*. 2017;11: e0005568. doi:10.1371/journal.pntd.0005568
5. Shocket MS, Ryan SJ, Mordecai EA. Temperature explains broad patterns of Ross River virus transmission. *eLife*. 2018;7. doi:10.7554/eLife.37762
6. Tesla B, Demakovskiy LR, Mordecai EA, Ryan SJ, Bonds MH, Ngonghala CN, et al. Temperature drives Zika virus transmission: evidence from empirical and mathematical models. *Proceedings of the Royal Society B: Biological Sciences*. 2018;285: 20180795. doi:10.1098/rspb.2018.0795
7. Mahmood F, Crans WJ. Effect of temperature on the development of *Culiseta melanura* (Diptera: Culicidae) and its impact on the amplification of eastern equine encephalomyelitis virus in birds. *J Med Entomol*. 1998;35: 1007–1012.
8. Weaver SC, Barrett ADT. Transmission cycles, host range, evolution and emergence of arboviral disease. *Nature Reviews Microbiology*. 2004;2: 789–801. doi:10.1038/nrmicro1006
9. Tekle A. The Physiology of Hibernation and Its Role in the Geographical Distribution of Populations of the *Culex Pipiens* Complex. *The American Journal of Tropical Medicine and Hygiene*. 1960;9: 321–330. doi:10.4269/ajtmh.1960.9.321
10. Madder DJ, Surgeoner GA, Helson BV. Number of generations, egg production, and developmental time of *Culex pipiens* and *Culex restuans* (Diptera: Culicidae) in southern Ontario. *J Med Entomol*. 1983;20: 275–287.
11. Ruybal JE, Kramer LD, Kilpatrick AM. Geographic variation in the response of *Culex pipiens* life history traits to temperature. *Parasites & Vectors*. 2016;9. doi:10.1186/s13071-016-1402-z

12. Li J, Zhu G, Zhou H, Tang J, Cao J. Effect of temperature on the development of *Culex pipiens pallens*. *Chin J Vector Biol & Control*. 2017;28: 35–37.
13. Reisen WK, Milby MM, Presser SB, Hardy JL. Ecology of Mosquitoes and St. Louis Encephalitis Virus in the Los Angeles Basin of California, 1987–1990. *Journal of Medical Entomology*. 1992;29: 582–598. doi:10.1093/jmedent/29.4.582
14. Mahmood F, Crans WJ. A thermal heat summation model to predict the duration of the gonotrophic cycle of *Culiseta melanura* in nature. *J Am Mosq Control Assoc*. 1997;13: 92–94.
15. Oda T, Mori A, Ueda M, Kurokawa K, others. Effects of temperatures on the oviposition and hatching of eggs in *Culex pipiens molestus* and *Culex pipiens quinquefasciatus*. *Tropical Medicine*. 1980;22: 167–180.
16. Mogi M. Temperature and Photoperiod Effects on Larval and Ovarian Development of New Zealand Strains of *Culex quinquefasciatus* (Diptera: Culicidae). *Annals of the Entomological Society of America*. 1992;85: 58–66. doi:10.1093/aesa/85.1.58
17. Ciota AT, Maticchiero AC, Kilpatrick AM, Kramer LD. The Effect of Temperature on Life History Traits of *Culex* Mosquitoes. *Journal of Medical Entomology*. 2014;51: 55–62. doi:10.1603/ME13003
18. McHaffey DG. Photoperiod and temperature influences on diapause in eggs of the floodwater mosquito *Aedes vexans* (Meigen) (Diptera: Culicidae). *J Med Entomol*. 1972;9: 564–571.
19. Rayah EAE, Groun NAA. Effect of temperature on hatching eggs and embryonic survival in the mosquito *Culex quinquefasciatus*. *Entomologia Experimentalis et Applicata*. 1983;33: 349–351. doi:10.1111/j.1570-7458.1983.tb03281.x
20. Van der Linde TCD. Development rates and percentage hatching of *Culex* (*Culex*) *theileri*; Theobald (Diptera: Culicidae) eggs at various constant temperatures. *Journal of the Entomological Society of Southern Africa*. 1990;53: 17–26.
21. Parker BM. Temperature and Salinity as Factors Influencing the Size and Reproductive Potentials of *Aedes dorsalis* (Diptera: Culicidae). *Annals of the Entomological Society of America*. 1982;75: 99–102. doi:10.1093/aesa/75.1.99
22. McHaffey DG, Harwood RF. Photoperiod and Temperature Influences on Diapause in Eggs of the Floodwater Mosquito, *Aedes Dorsalis* (Meigen) (Diptera: Culicidae)1. *Journal of Medical Entomology*. 1970;7: 631–644. doi:10.1093/jmedent/7.6.631
23. McHaffey DG. Photoperiod and temperature influences on diapause in eggs of the floodwater mosquito *Aedes nigromaculis* (Ludlow) (Diptera : Culicidae). *Mosquito News*. 1972;32: 51–61.

24. Shelton RM. The effect of temperatures on development of eight mosquito species. *Mosquito News*. 1973;33: 1–12.
25. Brust RA. WEIGHT AND DEVELOPMENT TIME OF DIFFERENT STADIA OF MOSQUITOES REARED AT VARIOUS CONSTANT TEMPERATURES. *The Canadian Entomologist*. 1967;99: 986–993. doi:10.4039/Ent99986-9
26. Trpiš M, Shemanchuk JA. EFFECT OF CONSTANT TEMPERATURE ON THE LARVAL DEVELOPMENT OF *AEDES VEXANS* (DIPTERA: CULICIDAE). *The Canadian Entomologist*. 1970;102: 1048–1051. doi:10.4039/Ent1021048-8
27. Mpho M, Callaghan A, Holloway GJ. Temperature and genotypic effects on life history and fluctuating asymmetry in a field strain of *Culex pipiens*. *Heredity*. 2002;88: 307–312. doi:10.1038/sj.hdy.6800045
28. Mpho M, Callaghan A, Holloway GJ. Effects of temperature and genetic stress on life history and fluctuating wing asymmetry in *Culex pipiens* mosquitoes. *European Journal of Entomology*. 2002;99: 405–412. doi:10.14411/eje.2002.050
29. Loetti V, Schweigmann N, Burrioni N. Development rates, larval survivorship and wing length of *Culex pipiens* (Diptera: Culicidae) at constant temperatures. *Journal of Natural History*. 2011;45: 2203–2213. doi:10.1080/00222933.2011.590946
30. Rueda LM, Patel KJ, Axtell RC, Stinner RE. Temperature-dependent development and survival rates of *Culex quinquefasciatus* and *Aedes aegypti* (Diptera: Culicidae). *J Med Entomol*. 1990;27: 892–898.
31. Mpho M, Holloway GJ, Callaghan A. A comparison of the effects of organophosphate insecticide exposure and temperature stress on fluctuating asymmetry and life history traits in *Culex quinquefasciatus*. *Chemosphere*. 2001;45: 713–720.
32. Reisen WK. Effect of temperature on *Culex tarsalis* (Diptera: Culicidae) from the Coachella and San Joaquin Valleys of California. *J Med Entomol*. 1995;32: 636–645.
33. Buth JL, Brust RA, Ellis RA. Development time, oviposition activity and onset of diapause in *Culex tarsalis*, *Culex restuans* and *Culiseta inornata* in southern Manitoba. *J Am Mosq Control Assoc*. 1990;6: 55–63.
34. Dodson BL, Kramer LD, Rasgon JL. Effects of larval rearing temperature on immature development and West Nile virus vector competence of *Culex tarsalis*. *Parasites & Vectors*. 2012;5: 199. doi:10.1186/1756-3305-5-199
35. Teng H-J, Apperson CS. Development and Survival of Immature *Aedes albopictus* and *Aedes triseriatus* (Diptera: Culicidae) in the Laboratory: Effects of Density, Food, and Competition on Response to Temperature. *Journal of Medical Entomology*. 2000;37: 40–52. doi:10.1603/0022-2585-37.1.40

36. Oda T, Uchida K, Mori A, Mine M, Eshita Y, Kurokawa K, et al. Effects of high temperature on the emergence and survival of adult *Culex pipiens molestus* and *Culex quinquefasciatus* in Japan. *J Am Mosq Control Assoc.* 1999;15: 153–156.
37. Kiarie-Makara MW, Ngumbi PM, Lee D-K. Effects of Temperature on the Growth and Development of *Culex pipiens* Complex Mosquitoes (Diptera: Culicidae). *Journal of Pharmacy and Biological Sciences.* 2015;10: 1–10.
38. Olejnicek J, Gelbic I. Differences in response to temperature and density between two strains of the mosquito, *Culex pipiens molestus* forskal. *J Vector Ecol.* 2000;25: 136–145.
39. Muturi EJ, Lampman R, Costanzo K, Alto BW. Effect of Temperature and Insecticide Stress on Life-History Traits of *Culex restuans* and *Aedes albopictus* (Diptera: Culicidae). *Journal of Medical Entomology.* 2011;48: 243–250. doi:10.1603/ME10017
40. Reisen WK, Meyer RP, Presser SB, Hardy JL. Effect of temperature on the transmission of western equine encephalomyelitis and St. Louis encephalitis viruses by *Culex tarsalis* (Diptera: Culicidae). *J Med Entomol.* 1993;30: 151–160.
41. Reisen WK, Fang Y, Martinez VM. Effects of Temperature on the Transmission of West Nile Virus by *Culex tarsalis* (Diptera: Culicidae). *Journal of Medical Entomology.* 2006;43: 309–317. doi:10.1603/0022-2585(2006)043[0309:EOTOTT]2.0.CO;2
42. Turell MJ, Lundström JO. Effect of environmental temperature on the vector competence of *Aedes aegypti* and *Ae. taeniorhynchus* for Ockelbo virus. *Am J Trop Med Hyg.* 1990;43: 543–550.
43. Lundström JO, Turell MJ, Niklasson B. Effect of environmental temperature on the vector competence of *Culex pipiens* and *Cx. torrentium* for Ockelbo virus. *Am J Trop Med Hyg.* 1990;43: 534–542.
44. Kilpatrick AM, Meola MA, Moudy RM, Kramer LD. Temperature, viral genetics, and the transmission of West Nile virus by *Culex pipiens* mosquitoes. *PLoS Pathogens.* 2008;4. doi:10.1371/journal.ppat.1000092
45. Dohm DJ, O’Guinn ML, Turell MJ. Effect of environmental temperature on the ability of *Culex pipiens* (Diptera: Culicidae) to transmit West Nile virus. *Journal of Medical Entomology.* 2002;39: 221–225. doi:10.1603/0022-2585-39.1.221
46. Kramer LD, Hardy JL, Presser SB. Effect of temperature of extrinsic incubation on the vector competence of *Culex tarsalis* for western equine encephalomyelitis virus. *Am J Trop Med Hyg.* 1983;32: 1130–1139.
47. Turell MJ, Rossi CA, Bailey CL. Effect of Extrinsic Incubation Temperature on the Ability of *Aedes Taeniorhynchus* and *Culex Pipiens* to Transmit Rift Valley Fever Virus. *The American Journal of Tropical Medicine and Hygiene.* 1985;34: 1211–1218. doi:10.4269/ajtmh.1985.34.1211

48. Chamberlain RW, Sudia WD. The effects of temperature upon the extrinsic incubation of eastern equine encephalitis in mosquitoes. *Am J Hyg.* 1955;62: 295–305.
49. Cornel AJ, Jupp PG, Blackburn NK. Environmental Temperature on the Vector Competence of *Culex univittatus* (Diptera: Culicidae) for West Nile Virus. *Journal of Medical Entomology.* 1993;30: 449–456. doi:10.1093/jmedent/30.2.449
50. Paull SH, Horton DE, Ashfaq M, Rastogi D, Kramer LD, Diffenbaugh NS, et al. Drought and immunity determine the intensity of West Nile virus epidemics and climate change impacts. *Proceedings of the Royal Society B: Biological Sciences.* 2017;284: 20162078. doi:10.1098/rspb.2016.2078
51. Nayar JK. Effects of constant and fluctuating temperatures on life span of *Aedes taeniorhynchus* adults. *Journal of Insect Physiology.* 1972;18: 1303–1313. doi:10.1016/0022-1910(72)90259-4
52. Andreadis SS, Dimotisiou OC, Savopoulou-Soultani M. Variation in adult longevity of *Culex pipiens f. pipiens*, vector of the West Nile Virus. *Parasitology Research.* 2014;113: 4315–4319. doi:10.1007/s00436-014-4152-x
53. Mordecai EA, Caldwell JM, Grossman MK, Lippi CA, Johnson LR, Neira M, et al. Thermal biology of mosquito-borne disease. *Ecology Letters.* 2019;22: 1690–1078. doi:<https://doi.org/10.1111/ele.13335>
54. Vogels CBF, Hartemink N, Koenraadt CJM. Modelling West Nile virus transmission risk in Europe: effect of temperature and mosquito biotypes on the basic reproduction number. *Scientific Reports.* 2017;7. doi:10.1038/s41598-017-05185-4
55. Kushmaro A, Friedlander TA, Levins R. Temperature Effects on the Basic Reproductive Number (R0) Of West Nile Virus, Based On Ecological Parameters: Endemic Vs. New Emergence Regions. *Journal of Tropical Diseases.* 2015;s1. doi:10.4172/2329-891X.1000S1-001
